# Supplementary material for: Global burden of active smoking among people living with HIV on antiretroviral therapy: a systematic review and meta-analysis
Source: PubMed Central journal article supplement (PMC7881452; doi:10.1186/s40249-021-00799-3), 2021-02-12
Supplement: 40249_2021_799_MOESM1_ESM.pdf [file 40249_2021_799_MOESM1_ESM.pdf]

# Global burden of active smoking among people living with HIV on antiretroviral therapy

a systematic review and meta-analysis

## APPENDIX

---

### Supplementary Tables

Supplementary Table 1. Search strategy in EMBASE..... 3

Supplementary Table 2. Characteristics of studies investigating the prevalence of active smoking in people living with HIV undergoing antiretroviral therapy..... 4

Supplementary Table 3. Individual characteristics of studies investigating the prevalence of active smoking in people living with HIV undergoing antiretroviral therapy ..... 5

Supplementary Table 4. Characteristics of included studies investigating the association between active smoking and non-adherence to antiretroviral therapy ..... 18

Supplementary Table 5. Individual characteristics of included studies investigating the association between active smoking and non-adherence to antiretroviral therapy ..... 19

Supplementary Table 6. Sensitivity analysis of prevalence of active smoking in the global population living with HIV undergoing ART ..... 22

### Supplementary Figures

Supplementary Figure 1. PRISMA flow chart ..... 25

Supplementary Figure 2. Funnel plot for meta-analysis of prevalence of active smoking in people undergoing antiretroviral therapy ..... 26

Supplementary Figure 3. Meta-analysis prevalence of active tobacco smoking in people living with HIV undergoing antiretroviral therapy in Asia and Pacific ..... 27

|                                                                                                                                                                                                            |    |
|------------------------------------------------------------------------------------------------------------------------------------------------------------------------------------------------------------|----|
| Supplementary Figure 4. Meta-analysis prevalence of active tobacco smoking in people living with HIV undergoing antiretroviral therapy in Eastern and Southern Africa .....                                | 28 |
| Supplementary Figure 5. Meta-analysis prevalence of active tobacco smoking in people living with HIV undergoing antiretroviral therapy in Eastern Europe and Central Asia .....                            | 29 |
| Supplementary Figure 6. Meta-analysis prevalence of active tobacco smoking in people living with HIV undergoing antiretroviral therapy in Latin America and the Caribbean .....                            | 29 |
| Supplementary Figure 7. Meta-analysis prevalence of active tobacco smoking in people living with HIV undergoing antiretroviral therapy in Middle-East and North Africa .....                               | 30 |
| Supplementary Figure 8. Meta-analysis prevalence of active tobacco smoking in people living with HIV undergoing antiretroviral therapy in West and Central Africa .....                                    | 30 |
| Supplementary Figure 9. Meta-analysis prevalence of active tobacco smoking in people living with HIV undergoing antiretroviral therapy in West and Central Europe and North America                        | 31 |
| Supplementary Figure 10. Funnel plot of the meta-analysis of association between exposure to active smoking and non-adherence to antiretroviral therapy in people living with HIV, crude analysis .....    | 32 |
| Supplementary Figure 11. Funnel plot of the meta-analysis of association between exposure to active smoking and non-adherence to antiretroviral therapy in people living with HIV, adjusted analysis ..... | 32 |

**Supplementary References**

|                                                                                                                                                                             |    |
|-----------------------------------------------------------------------------------------------------------------------------------------------------------------------------|----|
| Supplementary References 1. Articles included in the meta-analysis prevalence of active smoking in the global population undergoing antiretroviral therapy .....            | 33 |
| Supplementary References 2. Articles included in the meta-of the association between active smoking and adherence to antiretroviral therapy in people living with HIV ..... | 56 |

Supplementary Table 1. Search strategy in EMBASE

|    | <b>Search terms</b>                                                                                                                                                                                                             |
|----|---------------------------------------------------------------------------------------------------------------------------------------------------------------------------------------------------------------------------------|
| #1 | 'human immunodeficiency virus infection':ab,ti OR hiv:ab,ti OR aids:ab,ti<br>OR 'acquired immune deficiency syndrome':ab,ti                                                                                                     |
| #2 | 'antiretrovirus agent':ab,ti OR 'antiretroviral therapy':ab,ti OR 'highly active<br>antiretroviral therapy':ab,ti OR haart:ab,ti OR art:ab,ti OR 'combined<br>antiretroviral therapy':ab,ti OR 'antiretroviral treatment':ab,ti |
| #3 | #1 AND 2                                                                                                                                                                                                                        |
| #4 | 'tobacco'/exp OR tobacco OR 'smoking'/exp<br>OR smoking OR smok* OR 'cigarette'/exp<br>OR cigarette OR cigar* OR tabacum OR 'nicotine'/exp<br>OR nicotine OR 'nicotiana'/exp OR nicotiana                                       |
| #5 | #3 AND #4                                                                                                                                                                                                                       |

Supplementary Table 2. Characteristics of studies investigating the prevalence of active smoking in people living with HIV undergoing antiretroviral therapy

| <b>Variables</b>                        | <b>N = 290 studies</b> |
|-----------------------------------------|------------------------|
| <b>General characteristics</b>          |                        |
| <b>Year of publication, range</b>       | 2000-2019              |
| <b>Design, n (%)</b>                    |                        |
| - Cross-sectional                       | 125 (43.1)             |
| - Cohort                                | 115 (39.7)             |
| - Case control                          | 28 (9.7)               |
| - Clinical trial                        | 22 (7.6)               |
| <b>Setting, n (%)</b>                   |                        |
| - Hospital-based                        | 271 (93.5)             |
| - Population-based                      | 9 (3.0)                |
| - Both                                  | 4 (1.4)                |
| - Unclear                               | 6 (2.1)                |
| <b>Methodological quality</b>           |                        |
| <b>Sampling method, n (%)</b>           |                        |
| - Non-probabilistic                     | 249 (85.9)             |
| - Probabilistic                         | 41 (14.1)              |
| <b>Precision, n (%)</b>                 |                        |
| - Acceptable                            | 119 (41.0)             |
| - Low                                   | 171 (59.0)             |
| <b>Response rate, n (%)</b>             |                        |
| - 80% or more                           | 133 (45.9)             |
| - < 80%                                 | 14 (4.8)               |
| - Unclear                               | 143 (49.3)             |
| <b>Timing of data collection, n (%)</b> |                        |
| - Prospectively                         | 230 (79.3)             |
| - Retrospectively                       | 43 (14.8)              |
| - Both                                  | 1 (0.3)                |
| - Unclear                               | 16 (5.5)               |
| <b>Data collection procedure, n (%)</b> |                        |
| - Identical for all participants        | 286 (98.6)             |
| - Not identical                         | 1 (0.4)                |
| - Unclear                               | 3 (1.0)                |

Supplementary Table 3. Individual characteristics of studies investigating the prevalence of active smoking in people living with HIV undergoing antiretroviral therapy

| Study                  | Sample | % on ART | Mean age, years | % of Males | Duration since HIV diagnosis, years | Duration on ART, years | Probabilistic Sampling | Timing          | Precision acceptable | Response rate adequate | Identical procedure for data collection | Country      |
|------------------------|--------|----------|-----------------|------------|-------------------------------------|------------------------|------------------------|-----------------|----------------------|------------------------|-----------------------------------------|--------------|
| Aaron, 2012            | 183    | 100      | 28              | 0          | NR                                  | NR                     | No                     | Prospectively   | No                   | Yes                    | Yes                                     | USA          |
| Abioye, 2015           | 2038   | 100      | 38.1            | 31.8       | NR                                  | NR                     | No                     | Retrospectively | Yes                  | No                     | Yes                                     | Tanzania     |
| Aboud, 2010            | 705    | 100      | NR              | 72.2       | NR                                  | NR                     | No                     | Prospectively   | Yes                  | Yes                    | Yes                                     | UK           |
| Acevedo, 2002          | 90     | 100      | 42              | NR         | NR                                  | 3                      | No                     | Prospectively   | No                   | No                     | Yes                                     | USA          |
| Adefolalu, 2014        | 232    | 100      | 40              | 29.7       | NR                                  | NR                     | Yes                    | Prospectively   | Yes                  | Yes                    | Yes                                     | South Africa |
| Aderemi-Williams, 2017 | 248    | 100      | 40.4            | 40.3       | NR                                  | NR                     | No                     | Prospectively   | Yes                  | Yes                    | Yes                                     | Nigeria      |
| Alemu, 2016            | 296    | 90.5     | 33              | 36.5       | NR                                  | NR                     | No                     | Prospectively   | No                   | No                     | Yes                                     | Ethiopia     |
| Alemu, 2016            | 114    | 90.5     | 32              | 46         | NR                                  | NR                     | No                     | Prospectively   | No                   | No                     | Yes                                     | Ethiopia     |
| Alencherry, 2019       | 100    | 100      | 55              | 38         | 12                                  | 11                     | No                     | Prospectively   | No                   | Yes                    | Yes                                     | Uganda       |
| Alencherry, 2019       | 167    | 100      | 50              | 78         | 15                                  | 8.8                    | No                     | Prospectively   | No                   | Yes                    | Yes                                     | USA          |
| Allavena, 2012         | 334    | 100      | 38.1            | 72.5       | NR                                  | NR                     | No                     | Prospectively   | No                   | Yes                    | Yes                                     | France       |
| Allavena, 2012         | 2660   | 100      | 45.8            | 72.3       | NR                                  | NR                     | No                     | Prospectively   | No                   | Yes                    | Yes                                     | France       |
| Almeida, 2009          | 110    | 100      | 37.2            | 50.9       | 2.33                                | NR                     | Yes                    | Retrospectively | No                   | No                     | Yes                                     | Brazil       |
| Amberbir, 2019         | 820    | 100      | NR              | 28.2       | NR                                  | NR                     | No                     | Prospectively   | Yes                  | No                     | Yes                                     | Malawi       |
| Anastos, 2005          | 573    | 100      | 40.3            | NR         | NR                                  | NR                     | No                     | Prospectively   | Yes                  | Yes                    | Yes                                     | USA          |
| Anastos, 2005          | 184    | 100      | 38              | NR         | NR                                  | NR                     | No                     | Prospectively   | Yes                  | Yes                    | Yes                                     | USA          |
| Anastos, 2005          | 204    | 100      | 37              | 0          | NR                                  | NR                     | No                     | Prospectively   | Yes                  | Yes                    | Yes                                     | USA          |
| Anema, 2011            | 457    | 100      | 46              | 74.8       | NR                                  | NR                     | No                     | Retrospectively | Yes                  | Yes                    | Yes                                     | Canada       |
| Ansemant, 2013         | 263    | 91.6     | 47.7            | 71.5       | 13                                  | NR                     | No                     | Prospectively   | Yes                  | No                     | Yes                                     | France       |
| Arbune, 2017           | 102    | 95       | NR              | 54         | NR                                  | NR                     | No                     | Unclear         | Yes                  | No                     | Yes                                     | Romania      |
| Ayalew, 2016           | 340    | 100      | 34.4            | 39.7       | NR                                  | NR                     | No                     | Retrospectively | No                   | Yes                    | Yes                                     | Ethiopia     |
| Badie, 2017            | 170    | 100      | 41              | 63.5       | 5.5                                 | NR                     | No                     | Prospectively   | No                   | Yes                    | Yes                                     | Iran         |
| Bailey, 2014           | 100    | 98       | 29.5            | NR         | NR                                  | NR                     | No                     | Prospectively   | Yes                  | No                     | Yes                                     | Ukraine      |
| Baker, 2012            | 43     | 100      | 48              | 97         | NR                                  | NR                     | Yes                    | Prospectively   | No                   | Yes                    | Yes                                     | USA          |
| Baker, 2016            | 178    | 100      | 33              | 69.7       | 1.2                                 | NR                     | No                     | Prospectively   | Yes                  | Yes                    | Yes                                     | Global       |

|                           |      |      |      |      |      |      |     |                 |               |     |     |                                                                    |                 |
|---------------------------|------|------|------|------|------|------|-----|-----------------|---------------|-----|-----|--------------------------------------------------------------------|-----------------|
| <b>Baker, 2016</b>        | 154  | 100  | 46   | 70.1 | 1.3  | NR   | No  | Prospectively   | Yes           | Yes | Yes | Global (35 countries)                                              |                 |
| <b>Balasundaram, 2014</b> | 130  | 100  | NR   | 61   | NR   | NR   | No  | Prospectively   | No            | Yes | Yes | India                                                              |                 |
| <b>Baranoski, 2014</b>    | 65   | 100  | 49   | 0    | 13   | NR   | No  | Retrospectively | No            | No  | Yes | USA                                                                |                 |
| <b>Barska, 2017</b>       | 121  | 90.9 | 40   | 66   | 8    | NR   | No  | Prospectively   | No            | No  | Yes | Poland                                                             |                 |
| <b>Batista, 2014</b>      | 1380 | 100  | 40.6 | 64.1 | NR   | NR   | No  | Prospectively   | Yes           | No  | Yes | Brazil                                                             |                 |
| <b>Bednasz, 2016</b>      | 90   | 100  | NR   | 72.2 | NR   | NR   | No  | Retrospectively | No            | No  | Yes | USA                                                                |                 |
| <b>Begovac, 2015</b>      | 254  | 100  | 49   | 76   | NR   |      | 6   | No              | Prospectively | No  | No  | Yes                                                                | Croatia, Serbia |
| <b>Bekolo, 2014</b>       | 114  | 100  | 43   | 17.2 | NR   |      | 3   | No              | Prospectively | No  | No  | Yes                                                                | Cameroon        |
| <b>Berg, 2007</b>         | 495  | 100  | 40   | 90   | 4.8  | NR   | No  | Prospectively   | Yes           | No  | Yes | Germany                                                            |                 |
| <b>Bergersen, 2004</b>    | 219  | 100  | 41.6 | 81   | 7.15 | 3.75 | No  | Prospectively   | No            | No  | Yes | Norway                                                             |                 |
| <b>Bertisch, 2013</b>     | 59   | 95   | NR   | 85   | 5    | NR   | No  | Prospectively   | No            | No  | Yes | Switzerland                                                        |                 |
| <b>Besutti, 2016</b>      | 1446 | 100  | 48.4 | 71.2 | 17.5 | 10.6 | No  | Unclear         | Yes           | No  | Yes | Italy                                                              |                 |
| <b>Bhatta, 2018</b>       | 132  | 100  | 36.1 | 47   | NR   | NR   | Yes | Prospectively   | Yes           | Yes | Yes | Nepal                                                              |                 |
| <b>Bijker, 2019</b>       | 3703 | 100  | 46   | 69   | NR   | 9.8  | No  | Prospectively   | Yes           | No  | Yes | Asia                                                               |                 |
| <b>Biraguma, 2018</b>     | 698  | 100  | 38   | 32.5 | NR   | NR   | Yes | Prospectively   | Yes           | Yes | Yes | Rwanda                                                             |                 |
| <b>Boccaro, 2006</b>      | 42   | 100  | 46.2 | 40   | 12.4 | 4.4  | No  | Retrospectively | No            | No  | Yes | France                                                             |                 |
| <b>Boccaro, 2006</b>      | 42   | 100  | 48.7 | 40   | 11.2 | 4.3  | No  | Retrospectively | No            | No  | Yes | France                                                             |                 |
| <b>Boger, 2012</b>        | 107  | 100  | 46   | 76   | NR   | NR   | Yes | Prospectively   | No            | No  | Yes | USA                                                                |                 |
| <b>Bolland, 2019</b>      | 44   | 100  | 48.7 | 100  | 7.8  | 4.2  | No  | Prospectively   | No            | No  | No  | New Zealand                                                        |                 |
| <b>Bonnet, 2004</b>       | 964  | 94.3 | 41   | 78   | 7.6  | NR   | No  | Prospectively   | Yes           | Yes | Yes | France                                                             |                 |
| <b>Bonolo, 2013</b>       | 306  | 100  | 33   | 65   | NR   | NR   | No  | Prospectively   | No            | No  | Yes | Brazil                                                             |                 |
| <b>Brites-Alves, 2018</b> | 106  | 100  | 52.5 | 61.3 | NR   | 12.5 | No  | Prospectively   | No            | No  | Yes | Brazil                                                             |                 |
| <b>Brites-Alves, 2018</b> | 114  | 100  | 48.8 | 72.8 | NR   | 11.1 | No  | Prospectively   | No            | No  | Yes | Brazil                                                             |                 |
| <b>Brown, 2017</b>        | 197  | 94   | 50   | 80   | NR   | 7    | No  | Prospectively   | No            | No  | Yes | UK                                                                 |                 |
| <b>Buchacz, 2013</b>      | 3166 | 100  | 47   | 79   | NR   | 6.8  | No  | Prospectively   | Yes           | No  | Yes | USA                                                                |                 |
| <b>Bucher, 2012</b>       | 490  | 100  | NR   | 61.2 | NR   | NR   | No  | Prospectively   | Yes           | Yes | Yes | Switzerland                                                        |                 |
| <b>Bultum, 2018</b>       | 527  | 100  | NR   | 40.6 | NR   | NR   | No  | Prospectively   | Yes           | No  | Yes | Ethiopia                                                           |                 |
| <b>Cahn, 2010</b>         | 4010 | 100  | 41.9 | 73.9 | NR   | 2.1  | Yes | Prospectively   | Yes           | No  | Yes | Argentina; Brazil; Chile;<br>Colombia; Ecuador; Peru;<br>Venezuela |                 |

|                               |      |      |       |      |       |      |     |                 |     |     |         |                           |
|-------------------------------|------|------|-------|------|-------|------|-----|-----------------|-----|-----|---------|---------------------------|
| <b>Camargo, 2019</b>          | 112  | 100  | 42    | 66   | NR    | NR   | No  | Prospectively   | Yes | Yes | Yes     | Brazil                    |
| <b>Carballo, 2015</b>         | 133  | 90   | 51    | 85   | 12    | 11.5 | No  | Unclear         | No  | Yes | Yes     | Switzerland               |
| <b>Carr, 2015</b>             | 163  | 100  | 30    | 88   | 0.9   | NR   | Yes | Prospectively   | No  | Yes | Yes     | South America             |
| <b>Carr, 2015</b>             | 128  | 100  | 34    | 71   | 2.6   | NR   | Yes | Prospectively   | No  | Yes | Yes     | Asia                      |
| <b>Carr, 2015</b>             | 71   | 100  | 40    | 87   | 2.2   | NR   | Yes | Prospectively   | No  | Yes | Yes     | Australia; Europe         |
| <b>Carr, 2015</b>             | 46   | 100  | 39    | 22   | 3.7   | NR   | Yes | Prospectively   | No  | Yes | Yes     | South Africa              |
| <b>Carrieri, 2012</b>         | 1154 | 100  | 37.7  | 78   | NR    | 5.9  | No  | Prospectively   | Yes | No  | Yes     | France                    |
| <b>Castley, 2016</b>          | 474  | 100  | 45    | 78.5 | NR    | NR   | No  | Prospectively   | Yes | Yes | Yes     | Australia                 |
| <b>Chireshe, 2019</b>         | 600  | 100  | 41.8  | 44   | NR    | 6.5  | No  | Prospectively   | Yes | Yes | Yes     | Zimbabwe                  |
| <b>Chițu-Tișu, 2016</b>       | 60   | 100  | 34.6  | 58.3 | 4     | 4    | No  | Prospectively   | No  | Yes | Yes     | Romania                   |
| <b>Chițu-Tișu, 2017</b>       | 60   | 100  | 34.81 | 61.6 | 5     | 4    | No  | Retrospectively | No  | Yes | Yes     | Romania                   |
| <b>Cioe, 2017</b>             | 185  | 100  | 42.2  | 100  | NR    | NR   | No  | Prospectively   | No  | No  | Yes     | USA                       |
| <b>Cockerham, 2010</b>        | 922  | 100  | 43    | 69   | NR    | NR   | No  | Prospectively   | Yes | Yes | Yes     | USA                       |
| <b>Cole, 2018</b>             | 134  | 100  | 56    | 93   | 15    | 13   | No  | Prospectively   | No  | Yes | Yes     | Netherlands; UK           |
| <b>Colon-Lopez, 2018</b>      | 6526 | 91.3 | 47.2  | 64.2 | NR    | NR   | No  | Prospectively   | Yes | No  | Yes     | Puerto Rico               |
| <b>Conley, 2015</b>           | 452  | 100  | 41    | 78   | NR    | 2.9  | No  | Prospectively   | Yes | Yes | Yes     | USA                       |
| <b>Costiniuk, 2019</b>        | 101  | 97   | 54    | 87   | NR    | NR   | No  | Prospectively   | No  | No  | Yes     | Canada                    |
| <b>Cournil, 2012</b>          | 207  | 100  | 46.8  | 32.3 | NR    | 8.8  | No  | Prospectively   | No  | Yes | Yes     | Senegal                   |
| <b>Crane, 2017</b>            | 8567 | 91   | 46    | 85   | NR    | NR   | No  | Retrospectively | Yes | No  | Yes     | USA                       |
| <b>Da Silva, 2009</b>         | 243  | 100  | 41    | 59.7 | 5.8   | NR   | No  | Prospectively   | No  | Yes | Yes     | Brazil                    |
| <b>Daglan, 2013</b>           | 40   | 100  | 23    | 42.5 | 20.85 | 15.9 | Yes | Prospectively   | No  | No  | Yes     | Romania                   |
| <b>D'Ascenzo, 2014</b>        | 206  | 100  | 54    | 88   | 3.9   | 1.4  | Yes | Retrospectively | No  | No  | Unclear | Europe; South Africa; USA |
| <b>De Fátima Bonolo, 2008</b> | 295  | 100  | NR    | 65.8 | 2     | 2    | No  | Prospectively   | No  | Yes | Yes     | Brazil                    |
| <b>Degroote, 2014</b>         | 218  | 92   | 46    | 79.4 | NR    | NR   | No  | Prospectively   | No  | Yes | Yes     | Belgium                   |
| <b>Dentone, 2018</b>          | 158  | 100  | 39    | 88   | NR    | NR   | No  | Prospectively   | No  | No  | Yes     | Italy                     |
| <b>Depairon, 2001</b>         | 168  | 90.5 | 39    | 71.4 | NR    | NR   | No  | Prospectively   | No  | No  | Yes     | Switzerland               |
| <b>Deshwal, 2019</b>          | 475  | 100  | NR    | NR   | 8.1   | NR   | No  | Prospectively   | Yes | Yes | Yes     | India                     |
| <b>Dimala, 2016</b>           | 100  | 100  | 40.2  | 30   | NR    | NR   | No  | Prospectively   | No  | No  | Yes     | Cameroon                  |
| <b>Dirajlal-Fargo, 2018</b>   | 147  | 100  | 45.41 | 68.2 | NR    | 7.2  | No  | Prospectively   | No  | Yes | Yes     | USA                       |

|                              |       |       |      |      |      |      |     |                 |     |     |     |                                                                                                                          |
|------------------------------|-------|-------|------|------|------|------|-----|-----------------|-----|-----|-----|--------------------------------------------------------------------------------------------------------------------------|
| <b>Do T, 2016</b>            | 4274  | 100   | 40.7 | 70.7 | NR   | NR   | No  | Retrospectively | Yes | No  | Yes | Thailand Vietnam Indonesia<br>India Hong Kong SAR<br>Philippines Taiwan Malaysia<br>Japan South Korea Singapore<br>China |
| <b>Do T, 2016</b>            | 1496  | 100   | 44   | 67.8 | NR   | NR   | No  | Retrospectively | Yes | No  | Yes | Thailand Vietnam Indonesia<br>India Hong Kong SAR<br>Philippines Taiwan Malaysia<br>Japan South Korea Singapore<br>China |
| <b>Donald, 2017</b>          | 131   | 100   | NR   | 0    | NR   | NR   | No  | Prospectively   | No  | No  | Yes | South Africa                                                                                                             |
| <b>Drozd, 2017</b>           | 28912 | 100   | NR   | 81   | NR   | NR   | No  | Prospectively   | Yes | Yes | Yes | Canada, USA                                                                                                              |
| <b>Dubé, 2006</b>            | 33    | 100   | 43   | 100  | NR   | NR   | Yes | Prospectively   | No  | No  | Yes | USA                                                                                                                      |
| <b>Echeverría, 2014</b>      | 174   | 94.4  | 46.5 | 84.1 | NR   | NR   | No  | Prospectively   | No  | Yes | Yes | Spain                                                                                                                    |
| <b>Edward, 2013</b>          | 214   | 100   | 39.1 | 79.1 | NR   | NR   | No  | Prospectively   | No  | No  | Yes | Nigeria                                                                                                                  |
| <b>Engeland, 2008</b>        | 193   | 100   | NR   | 24   | NR   | NR   | Yes | Retrospectively | No  | Yes | Yes | USA                                                                                                                      |
| <b>Erlandson, 2012</b>       | 250   | 100   | 52   | 88   | 14   | NR   | No  | Prospectively   | No  | Yes | Yes | USA                                                                                                                      |
| <b>Erlandson, 2012</b>       | 43    | 100   | 51.8 | 86   | 16.8 | NR   | No  | Prospectively   | No  | Yes | Yes | USA                                                                                                                      |
| <b>Erlandson, 2012</b>       | 66    | 100   | 52.1 | 74   | 15.8 | NR   | No  | Prospectively   | No  | Yes | Yes | USA                                                                                                                      |
| <b>Fabbiani, 2013</b>        | 245   | 93.9  | 46   | 75.5 | 11   | 8    | No  | Prospectively   | No  | Yes | Yes | Italy                                                                                                                    |
| <b>Farhadian, 2018</b>       | 108   | 97.3  | 55   | 100  | NR   | NR   | No  | Prospectively   | No  | Yes | Yes | USA                                                                                                                      |
| <b>Florindo, 2007</b>        | 220   | 100   | NR   | 76.8 | NR   | NR   | No  | Prospectively   | Yes | Yes | Yes | Brazil                                                                                                                   |
| <b>Fontela, 2018</b>         | 277   | 100   | 53   | 67   | NR   | NR   | No  | Prospectively   | No  | No  | Yes | Spain                                                                                                                    |
| <b>Fontela, 2018</b>         | 62    | 100   | 66   | 85   | NR   | NR   | No  | Prospectively   | No  | No  | Yes | Spain                                                                                                                    |
| <b>Freitas, 2012</b>         | 149   | 100   | 44.4 | 45.4 | 6.7  | 5    | No  | Unclear         | No  | Yes | Yes | Portugal                                                                                                                 |
| <b>Freitas, 2012</b>         | 215   | 100   | 47   | 63   | 9.2  | 8    | No  | Unclear         | No  | Yes | Yes | Portugal                                                                                                                 |
| <b>Fricke, 2012</b>          | 40    | 100   | 44   | NR   | 14   | 9.2  | No  | Prospectively   | No  | No  | Yes | Germany                                                                                                                  |
| <b>Friis-Møller, 2010</b>    | 22625 | 100   | 40   | 74.1 | 4.8  | 2.5  | No  | Prospectively   | Yes | Yes | Yes | USA; Argentina; Australia;<br>Europe                                                                                     |
| <b>Furuya-Kanamori, 2013</b> | 314   | 100   | 48.1 | 100  | NR   | NR   | Yes | Prospectively   | No  | Yes | Yes | Australia                                                                                                                |
| <b>Fuster, 2016</b>          | 232   | 94.7  | 42.1 | 68.9 | 7.15 | 5.12 | Yes | Prospectively   | No  | No  | Yes | Chile                                                                                                                    |
| <b>Gaisa, 2014</b>           | 728   | 93.68 | NR   | NR   | NR   | NR   | No  | Prospectively   | Yes | Yes | Yes | USA                                                                                                                      |



|                               |       |      |       |      |       |      |     |                 |     |     |     |                                                    |
|-------------------------------|-------|------|-------|------|-------|------|-----|-----------------|-----|-----|-----|----------------------------------------------------|
| <b>Galán, 2016</b>            | 89    | 100  | 50.04 | 76.4 | NR    | NR   | No  | Prospectively   | No  | Yes | Yes | Spain                                              |
| <b>Gamarel, 2017</b>          | 377   | 100  | 46.15 | 100  | 13.45 | 9.85 | No  | Prospectively   | No  | Yes | Yes | USA                                                |
| <b>Gangcuangco, 2016</b>      | 138   | 100  | 50.5  | 88   | NR    | NR   | No  | Retrospectively | No  | No  | Yes | USA                                                |
| <b>García-Lázaro, 2007</b>    | 205   | 93.2 | 41.4  | NR   | NR    | NR   | Yes | Prospectively   | No  | No  | Yes | Spain                                              |
| <b>George, 2009</b>           | 195   | 100  | 44.1  | 82.5 | 8     | NR   | Yes | Prospectively   | No  | No  | Yes | USA                                                |
| <b>George, 2019</b>           | 318   | 100  | 39    | 25   | NR    | 4    | Yes | Prospectively   | No  | No  | Yes | South Africa                                       |
| <b>Ghadaki, 2016</b>          | 247   | 92   | 49    | 75.3 | NR    | NR   | No  | Prospectively   | No  | Yes | Yes | Canada                                             |
| <b>Ghehi, 2017</b>            | 2056  | 100  | 35    | 21.5 | NR    | NR   | No  | Prospectively   | Yes | Yes | Yes | Côte d'Ivoire                                      |
| <b>Gingo, 2015</b>            | 936   | 100  | 36.8  | NR   | NR    | 0    | No  | Prospectively   | Yes | No  | Yes | USA                                                |
| <b>Gingo, 2015</b>            | 1082  | 100  | 44.5  | NR   | NR    | 8    | No  | Prospectively   | Yes | No  | Yes | USA                                                |
| <b>Glass, 2006</b>            | 8033  | 100  | NR    | NR   | NR    | NR   | No  | Prospectively   | Yes | Yes | Yes | Switzerland                                        |
| <b>Gonçalves, 2009</b>        | 120   | 100  | NR    | NR   | NR    | NR   | No  | Prospectively   | No  | No  | Yes | Brazil                                             |
| <b>Grint, 2014</b>            | 9535  | 100  | 41    | 73.3 | NR    | NR   | No  | Prospectively   | Yes | No  | Yes | Israel; Argentina ; Europe                         |
| <b>Grome, 2017</b>            | 70    | 100  | 45    | 57   | NR    | 6.24 | No  | Prospectively   | No  | No  | Yes | USA                                                |
| <b>Guaraldi, 2012</b>         | 133   | 100  | 48.77 | 100  | 14.7  | NR   | No  | Prospectively   | No  | No  | Yes | Italy                                              |
| <b>Guaraldi, 2014</b>         | 1446  | 100  | 49    | 71.2 | NR    | NR   | No  | Prospectively   | Yes | Yes | Yes | Italy                                              |
| <b>Guzmán-Fulgencio, 2011</b> | 73    | 95.9 | 46    | 79.5 | 14    | 18.4 | No  | Prospectively   | No  | Yes | Yes | Spain                                              |
| <b>Haberer, 2019</b>          | 483   | 100  | 31    | 31   | NR    | 0    | No  | Prospectively   | Yes | No  | Yes | Uganda                                             |
| <b>Haberer, 2019</b>          | 421   | 100  | 34    | 30   | NR    | 0    | No  | Prospectively   | Yes | No  | Yes | South Africa                                       |
| <b>Haeri, 2009</b>            | 151   | 100  | 27    | 0    | NR    | NR   | No  | Retrospectively | No  | No  | Yes | USA                                                |
| <b>Haskelberg, 2014</b>       | 210   | 100  | 38.8  | 47.6 | NR    | 3.3  | Yes | Prospectively   | No  | Yes | Yes | Argentina, India, Malaysia, South Africa, Thailand |
| <b>Hatcher, 2012</b>          | 270   | 100  | 34    | 100  | NR    | NR   | No  | Prospectively   | No  | Yes | Yes | Uganda                                             |
| <b>Heaps-Woodruff, 2016</b>   | 46    | 100  | 47    | 89.5 | 11.45 | NR   | No  | Prospectively   | No  | No  | Yes | USA                                                |
| <b>Helleberg, 2015</b>        | 17995 | 100  | NR    | 71.3 | NR    | NR   | No  | Prospectively   | Yes | Yes | Yes | Europe; North America                              |
| <b>Helou, 2017</b>            | 92    | 100  | 53    | 66   | NR    | NR   | No  | Retrospectively | No  | No  | Yes | USA                                                |
| <b>Hidalgo-Tenorio, 2018</b>  | 95    | 93.7 | 43.7  | 0    | 13.6  | NR   | No  | Prospectively   | No  | No  | Yes | Spain                                              |
| <b>Hileman, 2012</b>          | 30    | 100  | NR    | 86   | 0.6   | NR   | No  | Retrospectively | No  | No  | Yes | USA                                                |

|                               |       |      |       |       |       |       |     |                 |     |     |         |               |
|-------------------------------|-------|------|-------|-------|-------|-------|-----|-----------------|-----|-----|---------|---------------|
| <b>Hileman, 2018</b>          | 147   | 100  | 45.4  | 78    | 12    | NR    | No  | Prospectively   | Yes | Yes | Yes     | USA           |
| <b>Hinojosa, 2018</b>         | 206   | 98.5 | 44    | NR    | 8     | NR    | Yes | Prospectively   | Yes | No  | Unclear | Mexico        |
| <b>Ho, 2012</b>               | 74    | 100  | 47    | NR    | 7     | NR    | No  | Prospectively   | No  | No  | Yes     | USA           |
| <b>Hoffman, 2016</b>          | 122   | 100  | 49    | 95    | NR    | NR    | No  | Prospectively   | No  | No  | Yes     | USA           |
| <b>Horizon, 2011</b>          | 30    | 100  | 49    | 100   | NR    | NR    | No  | Retrospectively | No  | Yes | Yes     | USA           |
| <b>Hsu, 2016</b>              | 149   | 100  | 48.5  | 92.6  | 15.2  | 8.1   | No  | Prospectively   | No  | No  | Yes     | USA           |
| <b>Hulgan, 2014</b>           | 37    | 100  | 43    | 0     | NR    | NR    | Yes | Prospectively   | Yes | No  | Yes     | North America |
| <b>Iloeje, 2005</b>           | 5787  | 100  | 39.4  | 88    | NR    | NR    | No  | Prospectively   | Yes | Yes | Yes     | USA           |
| <b>Iloeje, 2005</b>           | 1755  | 100  | 38.7  | 80    | NR    | NR    | No  | Prospectively   | Yes | Yes | Yes     | USA           |
| <b>Iqbal, 2010</b>            | 211   | 100  | 27.1  | 0     | 3     | NR    | No  | Prospectively   | No  | No  | Yes     | USA           |
| <b>Iyer, 2019</b>             | 254   | 100  | 37    | 82.6  | NR    | NR    | No  | Retrospectively | Yes | No  | Yes     | USA           |
| <b>Jackiewicz, 2019</b>       | 80    | 100  | 40.6  | NR    | NR    | NR    | No  | Prospectively   | No  | No  | Yes     | Poland        |
| <b>Jacobson, 2008</b>         | 379   | 100  | 43    | 74.67 | NR    | NR    | No  | Prospectively   | No  | Yes | Yes     | USA           |
| <b>Jaime, 2006</b>            | 223   | 100  | 38.9  | 76.8  | NR    | NR    | Yes | Prospectively   | No  | Yes | Yes     | Brazil        |
| <b>Jerome, 2017</b>           | 771   | 100  | NR    | 28.4  | NR    | NR    | No  | Retrospectively | Yes | No  | Yes     | Benin         |
| <b>Johs, 2017</b>             | 1015  | 100  | 51    | 81    | NR    | NR    | No  | Prospectively   | Yes | No  | Yes     | USA           |
| <b>Jordan, 2014</b>           | 100   | 100  | 29.86 | 100   | NR    | 1.35  | No  | Prospectively   | No  | Yes | Yes     | Vietnam       |
| <b>Julnes, 2016</b>           | 80    | 100  | 50    | 64    | 18    | NR    | No  | Prospectively   | No  | No  | Yes     | USA           |
| <b>Julnes, 2016</b>           | 34    | 100  | 50    | 62    | 20    | NR    | No  | Prospectively   | No  | No  | Yes     | USA           |
| <b>Kaio, 2013</b>             | 182   | 100  | 43.76 | 62.1  | 11.49 | 10.08 | No  | Prospectively   | No  | No  | Yes     | Brazil        |
| <b>Kakar, 2017</b>            | 180   | 100  | NR    | 96    | NR    | NR    | No  | Retrospectively | No  | No  | Yes     | Australia     |
| <b>Katoto, 2018</b>           | 474   | 95.7 | 43    | 28    | NR    | 5     | Yes | Prospectively   | Yes | No  | Yes     | DRC           |
| <b>Kazooba, 2017</b>          | 1024  | 100  | NR    | 35    | NR    | NR    | No  | Prospectively   | Yes | Yes | Yes     | Uganda        |
| <b>Kerchberger, 2019</b>      | 1118  | 100  | 48.8  | 0     | NR    | 10.9  | No  | Retrospectively | Yes | No  | Yes     | USA           |
| <b>Kesselring, 2011</b>       | 11459 | 100  | 38    | 77    | NR    | 4.8   | No  | Prospectively   | Yes | No  | Yes     | Netherlands   |
| <b>Ketut Agus Somia, 2019</b> | 42    | 100  | 30    | 35.72 | 2.04  | 1.54  | No  | Prospectively   | No  | Yes | Yes     | Indonesia     |
| <b>Ketut Agus Somia, 2019</b> | 42    | 100  | 39.5  | 35.72 | 3.29  | 2.71  | No  | Prospectively   | No  | Yes | Yes     | Indonesia     |
| <b>Knobel, 2019</b>           | 10897 | 100  | 48    | 71.4  | 15.8  | 13.1  | No  | Unclear         | Yes | No  | Yes     | Spain         |
| <b>Knudsen, 2014</b>          | 54    | 100  | 49    | NR    | 11    | 6     | No  | Prospectively   | No  | No  | Yes     | Denmark       |

|                            |       |      |      |       |       |      |     |                                   |     |     |     |                                                                          |
|----------------------------|-------|------|------|-------|-------|------|-----|-----------------------------------|-----|-----|-----|--------------------------------------------------------------------------|
| <b>Knudsen, 2014</b>       | 54    | 100  | 50   | NR    | 9     | 6    | No  | Prospectively                     | No  | No  | Yes | Denmark                                                                  |
| <b>Knudsen, 2015</b>       | 56    | 100  | 53   | 93    | NR    | NR   | No  | Prospectively                     | No  | No  | Yes | Denmark                                                                  |
| <b>Knudsen, 2015</b>       | 102   | 94   | 52   | 75    | 12.5  | NR   | No  | Prospectively                     | No  | Yes | Yes | Denmark                                                                  |
| <b>Kobayashi, 2019</b>     | 79    | 95   | 46   | NR    | NR    | NR   | Yes | Prospectively                     | No  | Yes | Yes | USA                                                                      |
| <b>Koethe, 2013</b>        | 158   | 100  | 45   | 29.8  | NR    | NR   | No  | Prospectively                     | Yes | Yes | Yes | USA                                                                      |
| <b>Koethe, 2016</b>        | 70    | 100  | NR   | 57.14 | NR    | NR   | No  | Prospectively                     | No  | No  | Yes | USA                                                                      |
| <b>Kooij, 2016</b>         | 594   | 94.4 | 52.8 | 88.7  | NR    | NR   | No  | Prospectively                     | Yes | Yes | Yes | Netherlands                                                              |
| <b>Krentz, 2005</b>        | 124   | 100  | NR   | NR    | NR    | NR   | No  | Retrospectively                   | No  | Yes | Yes | Canada                                                                   |
| <b>Krishnan, 2011</b>      | 3158  | 100  | 38   | 82    | NR    | NR   | No  | Prospectively                     | Yes | No  | Yes | Global                                                                   |
| <b>Kristoffersen, 2013</b> | 105   | 100  | 47.4 | 89    | 12.3  | 8.9  | No  | Prospectively                     | No  | No  | Yes | Denmark                                                                  |
| <b>Krsak, 2015</b>         | 438   | 90   | 44.3 | 68    | NR    | NR   | No  | Prospectively                     | Yes | No  | Yes | USA                                                                      |
| <b>Kulkarni, 2016</b>      | 49    | 100  | 43   | 100   | NR    | NR   | No  | Prospectively                     | No  | No  | Yes | USA                                                                      |
| <b>Kwong, 2006</b>         | 18603 | 100  | 36   | 82.79 | NR    | NR   | No  | Prospectively                     | Yes | Yes | Yes | Netherlands; USA                                                         |
| <b>Lake, 2013</b>          | 35    | 100  | 49   | 57    | NR    | NR   | No  | Prospectively                     | Yes | Yes | Yes | USA                                                                      |
| <b>Lake, 2015</b>          | 82    | 100  | NR   | 95    | NR    | NR   | No  | Prospectively                     | No  | No  | Yes | USA                                                                      |
| <b>Lake, 2015</b>          | 40    | 100  | NR   | 95    | NR    | NR   | No  | Prospectively                     | No  | No  | Yes | USA                                                                      |
| <b>Lake, 2018</b>          | 1018  | 100  | 53.7 | 100   | 12.2  | NR   | No  | Prospectively                     | Yes | No  | Yes | USA                                                                      |
| <b>Leader, 2016</b>        | 350   | 100  | 50.7 | 81    | NR    | NR   | No  | Prospectively                     | No  | Yes | Yes | USA                                                                      |
| <b>León, 2017</b>          | 84    | 100  | 42   | 75    | NR    | NR   | No  | Prospectively                     | No  | Yes | Yes | Spain                                                                    |
| <b>Leung, 2014</b>         | 199   | 99   | 49.3 | 100   | 12.05 | NR   | No  | Prospectively                     | No  | No  | Yes | Canada                                                                   |
| <b>Levy, 2019</b>          | 3368  | 93   | 50   | 78.4  | 13    | NR   | No  | Prospectively                     | Yes | No  | Yes | USA                                                                      |
| <b>Li J, 2018</b>          | 957   | 100  | 46   | 62.5  | NR    | NR   | No  | Prospectively,<br>Retrospectively | Yes | Yes | Yes | USA                                                                      |
| <b>Lifson, 2015</b>        | 4685  | 100  | NR   | 68    | NR    | NR   | Yes | Prospectively                     | Yes | Yes | Yes | Africa; Asia; Europe; Israel;<br>North America; South America;<br>Mexico |
| <b>Lima, 2009</b>          | 87    | 100  | 52   | 91.9  | NR    | NR   | No  | Prospectively                     | Yes | No  | Yes | Brazil                                                                   |
| <b>Liu, 2015</b>           | 231   | 94   | 49.6 | 91    | 12.4  | NR   | No  | Prospectively                     | No  | No  | Yes | Canada                                                                   |
| <b>Llop, 2018</b>          | 128   | 100  | 57   | 73    | 21    | 18.3 | No  | Prospectively                     | No  | No  | Yes | Spain                                                                    |
| <b>Lo, 2010</b>            | 78    | 95   | 46.5 | 100   | 13.5  | 7    | No  | Prospectively                     | No  | No  | Yes | USA                                                                      |
| <b>Longenecker, 2018</b>   | 55    | 100  | 49   | 84    | NR    | 1    | No  | Prospectively                     | No  | No  | Yes | USA                                                                      |

|                          |       |      |      |       |      |      |     |                 |     |     |     |                                                                     |
|--------------------------|-------|------|------|-------|------|------|-----|-----------------|-----|-----|-----|---------------------------------------------------------------------|
| <b>Looby, 2018</b>       | 33    | 91   | 47   | 0     | 14   | NR   | No  | Retrospectively | No  | No  | Yes | USA                                                                 |
| <b>Lorenz, 2017</b>      | 520   | 93.2 | 40.8 | 100   | 1    | NR   | No  | Prospectively   | Yes | No  | Yes | USA                                                                 |
| <b>Ma, 2011</b>          | 275   | 100  | 46   | 62.9  | NR   | NR   | Yes | Prospectively   | No  | No  | Yes | USA                                                                 |
| <b>MacDonald, 2018</b>   | 915   | 100  | 36   | 70.7  | 1.2  | NR   | No  | Prospectively   | Yes | Yes | Yes | Africa, Asia, Europe, Israel, Australia, Mexico, South America, USA |
| <b>Madeddu, 2008</b>     | 76    | 100  | 38.3 | 82.9  | NR   | NR   | No  | Retrospectively | No  | Yes | Yes | italy                                                               |
| <b>Madeddu, 2013</b>     | 111   | 100  | 42.3 | 69.4  | NR   | NR   | No  | Prospectively   | No  | Yes | Yes | italy                                                               |
| <b>Maggi, 2000</b>       | 55    | 100  | 36   | 85.5  | 5    | NR   | No  | Prospectively   | No  | Yes | Yes | Italy                                                               |
| <b>Maggi, 2004</b>       | 105   | 100  | 38   | 80.9  | 8    | 2.16 | No  | Prospectively   | No  | Yes | Yes | Italy                                                               |
| <b>Mai, 2018</b>         | 475   | 100  | 38.4 | 62    | NR   | NR   | No  | Prospectively   | Yes | Yes | Yes | Vietnam                                                             |
| <b>Makhubele, 2016</b>   | 46    | 100  | 27   | 0     | NR   | NR   | No  | Prospectively   | No  | No  | Yes | South Africa                                                        |
| <b>Makinson, 2011</b>    | 52    | 90   | 48   | 80.8  | NR   | NR   | No  | Retrospectively | No  | No  | Yes | France                                                              |
| <b>Mama, 2018</b>        | 291   | 100  | 37.4 | 28.5  | NR   | NR   | Yes | Prospectively   | Yes | Yes | Yes | Ethiopia                                                            |
| <b>Mandas, 2009</b>      | 86    | 100  | 40.9 | 54.7  | NR   | NR   | No  | Unclear         | No  | Yes | Yes | Italy                                                               |
| <b>Marando, 2016</b>     | 690   | 100  | 45   | 72.5  | 11.7 | NR   | Yes | Prospectively   | Yes | Yes | Yes | Italy                                                               |
| <b>Marcellin, 2017</b>   | 955   | 92   | 45.6 | 70    | 16.2 | 10.3 | No  | Prospectively   | Yes | Yes | Yes | France                                                              |
| <b>Martin, 2013</b>      | 210   | 100  | 21   | 47.6  | NR   | NR   | No  | Prospectively   | No  | Yes | Yes | India, Malaysia, Thailand, South Africa, Argentina                  |
| <b>Mashinya, 2015</b>    | 214   | 100  | 44.8 | 20    | NR   | 3.2  | No  | Prospectively   | No  | Yes | Yes | South Africa                                                        |
| <b>May, 2007</b>         | 13100 | 100  | 50   | 100   | NR   | NR   | No  | Retrospectively | Yes | Yes | Yes | UK;USA                                                              |
| <b>Mccombe, 2013</b>     | 1320  | 100  | 43.8 | 81    | NR   | NR   | No  | Prospectively   | Yes | Yes | Yes | Canada                                                              |
| <b>Melaku, 2019</b>      | 120   | 100  | 42.3 | 43.3  | NR   | NR   | No  | Prospectively   | No  | Yes | Yes | Ethiopia                                                            |
| <b>Melaku, 2019</b>      | 120   | 100  | 38.4 | 42.3  | NR   | NR   | No  | Prospectively   | No  | Yes | Yes | Ethiopia                                                            |
| <b>Mercié, 2002</b>      | 422   | 100  | 41   | 72.8  | 7    | 3    | No  | Prospectively   | Yes | No  | Yes | France                                                              |
| <b>Miller, 2014</b>      | 3570  | 100  | NR   | 77.2  | 7.3  | 4    | No  | Prospectively   | Yes | Yes | Yes | Europe, Americas, Western Pacific                                   |
| <b>Misra, 2013</b>       | 199   | 100  | 43.6 | NR    | 9.5  | 5.6  | No  | Unclear         | Yes | No  | Yes | USA                                                                 |
| <b>Missailidis, 2015</b> | 97    | 100  | 51   | 100   | 13   | NR   | Yes | Prospectively   | No  | No  | Yes | Sweden                                                              |
| <b>Monnig, 2016</b>      | 124   | 92.7 | 42.8 | 100   | 9.9  | NR   | No  | Prospectively   | No  | No  | Yes | USA                                                                 |
| <b>Monteiro, 2011</b>    | 53    | 100  | 43.4 | 50.94 | NR   | 4.9  | No  | Unclear         | No  | No  | Yes | Brazil                                                              |

|                           |      |      |      |       |      |      |     |                 |     |     |     |                           |
|---------------------------|------|------|------|-------|------|------|-----|-----------------|-----|-----|-----|---------------------------|
| <b>Morell, 2016</b>       | 96   | 100  | 44.8 | 19.2  | NR   | 7    | No  | Prospectively   | No  | No  | Yes | Spain                     |
| <b>Morillo, 2018</b>      | 53   | 100  | 53.6 | 90.6  | NR   | NR   | Yes | Prospectively   | Yes | No  | Yes | Spain                     |
| <b>Morojele, 2017</b>     | 130  | 100  | NR   | 60.8  | NR   | NR   | No  | Prospectively   | No  | Yes | Yes | India                     |
| <b>Muiru, 2018</b>        | 105  | 100  | 49   | 46    | NR   | NR   | No  | Prospectively   | No  | Yes | Yes | Uganda                    |
| <b>Muramatsu, 2019</b>    | 306  | 96.1 | 49   | 95.1  | NR   | 6.23 | No  | Retrospectively | No  | No  | Yes | Japan                     |
| <b>Muronya, 2011</b>      | 174  | 100  | 40.8 | 38.5  | NR   | 2.96 | Yes | Prospectively   | No  | Yes | Yes | Malawi                    |
| <b>Mussini, 2013</b>      | 4942 | 100  | 37   | 72.6  | NR   | NR   | No  | Prospectively   | Yes | No  | Yes | Italy                     |
| <b>Muyanja, 2016</b>      | 250  | 100  | 36   | 32    | NR   | 2.6  | No  | Prospectively   | No  | Yes | Yes | Uganda                    |
| <b>Nakamura, 2011</b>     | 44   | 97.8 | 40   | 100   | NR   | 5.8  | No  | Unclear         | No  | Yes | Yes | Japan                     |
| <b>Ndona, 2012</b>        | 49   | 100  | 43   | 42.9  | NR   | NR   | No  | Prospectively   | No  | Yes | Yes | RDC                       |
| <b>Nduka, 2016</b>        | 306  | 100  | 38.6 | 34.6  | 4.2  | NR   | No  | Prospectively   | Yes | Yes | Yes | Nigeria                   |
| <b>Neumann, 2010</b>      | 309  | 100  | 42.1 | 77.67 | NR   | NR   | No  | Prospectively   | No  | No  | Yes | Germany                   |
| <b>Nguyen, 2008</b>       | 36   | 100  | 53   | 97    | 12   | NR   | Yes | Prospectively   | No  | Yes | Yes | USA                       |
| <b>Nguyen, 2016</b>       | 1050 | 100  | 35.6 | 58.4  | 6.2  | 4.4  | No  | Prospectively   | Yes | No  | Yes | Vietnam                   |
| <b>Niewoehner, 2015</b>   | 328  | 100  | 37   | 36    | 1.5  | NR   | Yes | Prospectively   | No  | Yes | Yes | Africa                    |
| <b>Niewoehner, 2015</b>   | 103  | 100  | 36   | 73    | 0.8  | NR   | Yes | Prospectively   | No  | Yes | Yes | Asia                      |
| <b>Niewoehner, 2015</b>   | 313  | 100  | 31.3 | 92    | 1.2  | NR   | Yes | Prospectively   | No  | Yes | Yes | Australia; Europe; Israel |
| <b>Niewoehner, 2015</b>   | 191  | 100  | 34   | 86    | 0.6  | NR   | Yes | Prospectively   | No  | Yes | Yes | Mexico; South America     |
| <b>Nittayananta, 2014</b> | 99   | 100  | 38.5 | 52    | 7    | NR   | No  | Prospectively   | No  | Yes | Yes | Thailand                  |
| <b>Nkuize, 2012</b>       | 145  | 100  | 44.2 | 47.59 | NR   | NR   | No  | Prospectively   | No  | Yes | Yes | Belgium                   |
| <b>Nolan, 2017</b>        | 202  | 100  | 50   | 65.8  | NR   | NR   | No  | Retrospectively | No  | No  | Yes | USA                       |
| <b>North, 2017</b>        | 734  | 100  | 34   | 30    | NR   | NR   | No  | Prospectively   | Yes | No  | Yes | Uganda                    |
| <b>North, 2018</b>        | 269  | 100  | 52   | 54    | NR   | 9    | No  | Prospectively   | No  | No  | Yes | Uganda                    |
| <b>Nouaman, 2018</b>      | 795  | 100  | 34   | 46.3  | NR   | 0    | No  | Prospectively   | Yes | No  | Yes | Zambia                    |
| <b>Obry-Roguet, 2018</b>  | 862  | 96   | 52.8 | 67.9  | 20.3 | 16   | No  | Retrospectively | Yes | No  | Yes | France                    |
| <b>O'Halloran, 2019</b>   | 202  | 100  | 55   | 75    | NR   | NR   | No  | Prospectively   | No  | No  | Yes | USA                       |
| <b>Okafor, 2017</b>       | 1902 | 100  | 40   | 69    | NR   | NR   | No  | Retrospectively | Yes | No  | Yes | USA                       |
| <b>Önen, 2010</b>         | 122  | 91.8 | 55.8 | 82.8  | 10.4 | NR   | No  | Prospectively   | No  | No  | Yes | USA                       |
| <b>Pacek, 2014</b>        | 358  | 100  | 48.9 | 61.8  | NR   | 0.6  | No  | Retrospectively | No  | No  | Yes | USA                       |
| <b>Palacios, 2006</b>     | 95   | 100  | 40   | 82    | 4.7  | NR   | No  | Prospectively   | No  | Yes | Yes | Spain                     |

|                                 |       |      |      |      |      |      |     |                 |     |     |     |                                   |
|---------------------------------|-------|------|------|------|------|------|-----|-----------------|-----|-----|-----|-----------------------------------|
| <b>Paella, 2018</b>             | 917   | 100  | NR   | 100  | NR   | NR   | No  | Prospectively   | Yes | Yes | Yes | USA                               |
| <b>Parikh, 2015</b>             | 150   | 100  | 52   | 88   | NR   | 0.5  | Yes | Unclear         | Yes | No  | Yes | USA                               |
| <b>Park, 2017</b>               | 147   | 100  | 46   | 78   | 11.6 | 5.5  | Yes | Prospectively   | Yes | No  | Yes | USA                               |
| <b>Parrinello, 2012</b>         | 226   | 99   | 41.7 | NR   | NR   | NR   | No  | Prospectively   | No  | Yes | Yes | USA                               |
| <b>Parrinello, 2012</b>         | 148   | 99   | 42.8 | NR   | NR   | NR   | No  | Prospectively   | No  | Yes | Yes | USA                               |
| <b>Passos, 2012</b>             | 73    | 94.5 | 43   | 100  | 8.5  | 7.7  | No  | Prospectively   | No  | No  | Yes | Brazil                            |
| <b>Pastori, 2015</b>            | 36    | 100  | 42.6 | 69.4 | NR   | 11.4 | No  | Unclear         | No  | Yes | Yes | Italy                             |
| <b>Payam, 2011</b>              | 68    | 91.2 | 48.5 | 94.1 | NR   | NR   | No  | Retrospectively | No  | Yes | Yes | USA                               |
| <b>Petoumenos, 2011</b>         | 27136 | 100  | 38   | 77   | NR   | 1.8  | No  | Prospectively   | Yes | No  | Yes | Argentina; Australia;Europe; USA. |
| <b>Petraglia, 2017</b>          | 164   | 90   | 45.1 | 70.1 | NR   | NR   | No  | Prospectively   | No  | Yes | Yes | Russia                            |
| <b>Pinzone, 2019</b>            | 72    | 100  | 47   | 80.6 | 10.2 | 6    | No  | Prospectively   | Yes | No  | Yes | Italy                             |
| <b>Pool, 2019</b>               | 819   | 98.1 | 52   | NR   | 8    | NR   | No  | Prospectively   | Yes | Yes | Yes | Ireland, UK                       |
| <b>Poudel, 2014</b>             | 233   | 100  | 35.6 | 52.4 | NR   | NR   | No  | Prospectively   | No  | No  | Yes | Nepal                             |
| <b>PrayGod, 2017</b>            | 273   | 100  | 41.5 | 34.8 | NR   | NR   | No  | Retrospectively | No  | No  | Yes | Tanzania                          |
| <b>Protopopescu, 2012</b>       | 599   | 100  | 37.6 | 77.7 | NR   | NR   | No  | Prospectively   | Yes | No  | Yes | France                            |
| <b>Quirico, 2018</b>            | 79    | 100  | 64.4 | 51   | 16   | 11.3 | No  | Prospectively   | No  | Yes | Yes | Italy                             |
| <b>Quiros-Roldan, 2005</b>      | 36    | 100  | NR   | 75   | NR   | NR   | No  | Prospectively   | No  | Yes | Yes | Italy                             |
| <b>Rabkin, 2015</b>             | 175   | 100  | 45.4 | 25.7 | 4    | NR   | No  | Prospectively   | No  | No  | Yes | South Africa                      |
| <b>Rabkin, 2018</b>             | 1826  | 100  | 47   | 38   | NR   | NR   | No  | Prospectively   | Yes | Yes | Yes | Swaziland                         |
| <b>Rasmussen, 2016</b>          | 55    | 100  | 49   | 91   | 10   | NR   | No  | Retrospectively | Yes | No  | Yes | Denmark                           |
| <b>Rasmussen, 2016</b>          | 182   | 100  | 50   | 92   | 10   | NR   | No  | Retrospectively | Yes | No  | Yes | Denmark                           |
| <b>Reid, 2017</b>               | 225   | 100  | 46.5 | NR   | NR   | 13   | No  | Prospectively   | No  | Yes | Yes | USA                               |
| <b>Reid, 2019</b>               | 148   | 100  | 50   | 53   | NR   | 8    | No  | Prospectively   | No  | No  | Yes | USA                               |
| <b>Rezaei-Soufi, 2014</b>       | 50    | 100  | 36   | 71.4 | 3    | 1    | No  | Prospectively   | No  | No  | Yes | Iran                              |
| <b>Rezaei-Soufi, 2014</b>       | 100   | 100  | 38   | 81.8 | 3    | 1    | No  | Prospectively   | No  | No  | Yes | Iran                              |
| <b>Rocha-Brischiliari, 2014</b> | 178   | 100  | NR   | 0    | NR   | NR   | No  | Retrospectively | Yes | Yes | Yes | Brazil                            |
| <b>Rollet-Kurhajec, 2015</b>    | 308   | 100  | 44   | 72   | 11   | 6    | Yes | Prospectively   | No  | Yes | Yes | Canada                            |

|                             |      |      |      |       |      |      |     |                 |     |     |     |                                                                                                                                                                                                             |
|-----------------------------|------|------|------|-------|------|------|-----|-----------------|-----|-----|-----|-------------------------------------------------------------------------------------------------------------------------------------------------------------------------------------------------------------|
| <b>Ronit, 2018</b>          | 4576 | 100  | 36.8 | 73.4  | NR   | NR   | Yes | Prospectively   | Yes | Yes | Yes | Africa;Asia;Europe;Israel;South America;USA                                                                                                                                                                 |
| <b>Ryom, 2018</b>           | 1157 | 93.7 | 44   | 88.3  | NR   | NR   | No  | Prospectively   | Yes | No  | Yes | Australia, Europe, and the USA                                                                                                                                                                              |
| <b>Ryom, 2019</b>           | 2467 | 96   | 60   | 77.2  | NR   | NR   | No  | Prospectively   | Yes | Yes | Yes | Europe; USA; Australia                                                                                                                                                                                      |
| <b>Sabin, 2008</b>          | 517  | 98.4 | 49   | 92    | NR   | NR   | No  | Prospectively   | Yes | No  | Yes | Europe, the USA, Australia                                                                                                                                                                                  |
| <b>Salyer, 2006</b>         | 95   | 100  | 41.3 | 83    | 14   | 11   | No  | Unclear         | No  | Yes | Yes | USA                                                                                                                                                                                                         |
| <b>Sampériz, 2014</b>       | 275  | 92   | 49   | 78.2  | 11.9 | NR   | No  | Prospectively   | No  | Yes | Yes | Spain                                                                                                                                                                                                       |
| <b>Sansores, 2008</b>       | 207  | 100  | 41.3 | 90    | 6.92 | 5.39 | No  | Unclear         | No  | No  | Yes | Mexico                                                                                                                                                                                                      |
| <b>Sarfo, 2019</b>          | 250  | 100  | 45.7 | 18.8  | 8.6  | NR   | No  | Unclear         | No  | Yes | Yes | Ghana                                                                                                                                                                                                       |
| <b>Seang, 2018</b>          | 57   | 100  | 57   | 100   | 22   | 11   | No  | Prospectively   | No  | Yes | Yes | USA                                                                                                                                                                                                         |
| <b>Serrano-Villar, 2014</b> | 132  | 100  | 47   | 78    | 11   | 7.5  | No  | Prospectively   | No  | No  | Yes | Spain                                                                                                                                                                                                       |
| <b>Shahmanesh, 2016</b>     | 8762 | 100  | 42   | 76.28 | NR   | NR   | No  | Prospectively   | Yes | Yes | Yes | Europe; Israel; Argentina                                                                                                                                                                                   |
| <b>Sharma, 2013</b>         | 100  | 100  | NR   | 61    | NR   | NR   | No  | Prospectively   | No  | No  | Yes | Nepal                                                                                                                                                                                                       |
| <b>Sherer, 2014</b>         | 2035 | 100  | NR   | 63    | NR   | NR   | No  | Prospectively   | Yes | No  | Yes | North America (the United States); Latin American (Brazil); Europe (France, Germany, Italy, Russia, Spain, and the United Kingdom); Asia (Australia and Korea); and Africa (Cote d'Ivoire and South Africa) |
| <b>Shin, 2019</b>           | 598  | 100  | 37   | 0     | 6    | NR   | No  | Retrospectively | Yes | No  | Yes | India                                                                                                                                                                                                       |
| <b>Shirley, 2013</b>        | 200  | 97   | 49   | 84    | 15.2 | NR   | No  | Prospectively   | No  | Yes | Yes | USA                                                                                                                                                                                                         |
| <b>Short, 2014</b>          | 131  | 100  | NR   | NR    | NR   | NR   | No  | Prospectively   | No  | Yes | Yes | UK                                                                                                                                                                                                          |
| <b>Shuter, 2008</b>         | 64   | 100  | NR   | 55    | NR   | NR   | No  | Prospectively   | No  | No  | Yes | USA                                                                                                                                                                                                         |
| <b>Siedner, 2016</b>        | 105  | 100  | 49   | 49    | NR   | 7    | No  | Prospectively   | No  | No  | Yes | Uganda                                                                                                                                                                                                      |
| <b>Siemieniuk, 2011</b>     | 1946 | 100  | NR   | 78.5  | NR   | NR   | No  | Prospectively   | Yes | No  | Yes | Canada                                                                                                                                                                                                      |
| <b>Smit, 2018</b>           | 8791 | 100  | 43.8 | 77.9  | NR   | 4.1  | No  | Prospectively   | Yes | No  | Yes | Netherlands                                                                                                                                                                                                 |
| <b>Sociás, 2016</b>         | 397  | 100  | 41   | 58.9  | NR   | NR   | Yes | Prospectively   | Yes | Yes | Yes | Canada                                                                                                                                                                                                      |
| <b>Søgaard, 2010</b>        | 75   | 100  | 49.1 | 85.3  | NR   | NR   | No  | Unclear         | No  | Yes | Yes | Denmark                                                                                                                                                                                                     |
| <b>Soliman, 2015</b>        | 456  | 100  | 37   | 80    | 1.4  | NR   | Yes | Prospectively   | Yes | Yes | Yes | North America                                                                                                                                                                                               |
| <b>Soliman, 2015</b>        | 1428 | 100  | 38   | 92    | 1.1  | NR   | Yes | Prospectively   | Yes | Yes | Yes | Australia, Europe, Israel                                                                                                                                                                                   |
| <b>Soliman, 2015</b>        | 1048 | 100  | 32   | 86    | 0.5  | NR   | Yes | Prospectively   | Yes | Yes | Yes | South America                                                                                                                                                                                               |



|                                 |       |       |      |       |      |     |     |                 |     |     |     |                        |
|---------------------------------|-------|-------|------|-------|------|-----|-----|-----------------|-----|-----|-----|------------------------|
| <b>Soliman, 2015</b>            | 154   | 100   | 30   | 80    | 0.6  | NR  | Yes | Prospectively   | Yes | Yes | Yes | Asia                   |
| <b>Spinelli, 2019</b>           | 156   | 91.03 | NR   | 92.95 | NR   | NR  | No  | Retrospectively | No  | Yes | Yes | USA                    |
| <b>Sutton, 2019</b>             | 26526 | 100   | 49.3 | 97    | NR   | NR  | No  | Retrospectively | Yes | No  | Yes | USA                    |
| <b>Sutton, 2019</b>             | 53052 | 100   | 49.3 | 97    | NR   | NR  | No  | Retrospectively | Yes | No  | Yes | USA                    |
| <b>Syed, 2013</b>               | 67    | 100   | 16.7 | NR    | NR   | NR  | No  | Unclear         | No  | Yes | Yes | USA                    |
| <b>Szymanek-Pasternak, 2016</b> | 98    | 100   | 41   | NR    | NR   | NR  | No  | Prospectively   | No  | No  | Yes | Poland                 |
| <b>Tarancon-Diez, 2018</b>      | 253   | 96    | 29   | 75    | 19   | NR  | No  | Prospectively   | No  | No  | Yes | Spain                  |
| <b>Thudium, 2018</b>            | 1082  | 98.6  | 50.7 | 84.8  | NR   | NR  | No  | Retrospectively | Yes | No  | Yes | Denmark                |
| <b>Tomažič, 2007</b>            | 37    | 100   | 43.8 | 100   | 11.5 | 5.5 | Yes | Prospectively   | No  | No  | Yes | Slovenia               |
| <b>Tomažič, 2007</b>            | 35    | 100   | 45.5 | 100   | 11   | 5.1 | Yes | Prospectively   | No  | No  | Yes | Slovenia               |
| <b>Troy, 2016</b>               | 208   | 100   | 46   | 67    | NR   | NR  | No  | Retrospectively | No  | Yes | Yes | USA                    |
| <b>Troy, 2016</b>               | 191   | 100   | 45   | 66    | NR   | NR  | No  | Retrospectively | No  | Yes | Yes | USA                    |
| <b>Troy, 2016</b>               | 33    | 100   | 53   | 70    | NR   | NR  | No  | Retrospectively | No  | Yes | Yes | USA                    |
| <b>Troy, 2016</b>               | 193   | 100   | 46   | 68    | NR   | NR  | No  | Retrospectively | No  | Yes | Yes | USA                    |
| <b>Turčinov, 2011</b>           | 130   | 100   | 43   | 79    | NR   | NR  | No  | Retrospectively | No  | No  | Yes | Croatia                |
| <b>van Zoest, 2016</b>          | 499   | 94.7  | 52.9 | 88.6  | 12.2 | NR  | No  | Prospectively   | Yes | No  | Yes | Netherlands            |
| <b>Vernon, 2009</b>             | 101   | 90    | 42   | 74    | 7.2  | 1.2 | No  | Prospectively   | No  | No  | Yes | USA                    |
| <b>Volpe, 2013</b>              | 211   | 100   | 45   | 73    | 11   | 3.1 | No  | Prospectively   | No  | Yes | Yes | USA                    |
| <b>Waweru, 2013</b>             | 207   | 100   | 39.9 | 47.8  | NR   | NR  | Yes | Prospectively   | No  | No  | Yes | South Africa           |
| <b>Weldehaweria, 2017</b>       | 170   | 100   | 39.3 | 42.4  | NR   | NR  | Yes | Prospectively   | Yes | No  | Yes | Ethiopia               |
| <b>Weldehaweria, 2017</b>       | 170   | 100   | 39.2 | 42.4  | NR   | NR  | Yes | Prospectively   | Yes | No  | Yes | Ethiopia               |
| <b>Willig, 2017</b>             | 42    | 100   | 45.5 | 0     | NR   | NR  | No  | Prospectively   | No  | No  | Yes | USA                    |
| <b>Winston, 2013</b>            | 557   | 100   | 44   | 77    | NR   | NR  | No  | Prospectively   | Yes | Yes | Yes | UK                     |
| <b>Wójtowicz, 2019</b>          | 3495  | 99    | 32.8 | 77    | NR   | NR  | No  | Prospectively   | Yes | Yes | Yes | Switzerland            |
| <b>Worm, 2009</b>               | 23202 | 100   | 38   | 74    | NR   | NR  | No  | Prospectively   | Yes | No  | Yes | USA; Australia; Europe |
| <b>Wu, 2019</b>                 | 1006  | 98.5  | 49.3 | 93.2  | NR   | NR  | No  | Prospectively   | Yes | No  | Yes | Taiwan                 |
| <b>Yanagisawa, 2012</b>         | 520   | 100   | 47.6 | NR    | NR   | NR  | No  | Prospectively   | Yes | Yes | Yes | Japan                  |
| <b>Yuan, 2006</b>               | 3414  | 100   | 39.3 | 86    | NR   | NR  | No  | Retrospectively | Yes | Yes | Yes | USA                    |
| <b>Zachry, 2013</b>             | 5530  | 100   | NR   | 85.79 | NR   | NR  | No  | Retrospectively | Yes | No  | Yes | USA                    |



|                     |      |     |    |      |    |     |    |               |     |    |         |       |
|---------------------|------|-----|----|------|----|-----|----|---------------|-----|----|---------|-------|
| <b>Zannou, 2009</b> | 79   | 100 | 38 | 40.5 | NR | 1.9 | No | Prospectively | Yes | No | Yes     | Benin |
| <b>Zhang, 2018</b>  | 1799 | 100 | 42 | 0    | NR | NR  | No | Prospectively | Yes | No | Unclear | USA   |

NR: Not reported

Supplementary Table 4. Characteristics of included studies investigating the association between active smoking and non-adherence to antiretroviral therapy

| <b>Variables</b>                              | <b>N = 20</b> |
|-----------------------------------------------|---------------|
| <b>General characteristics</b>                |               |
| <b>Year of publication, range</b>             | 2006-2019     |
| <b>Design, n (%)</b>                          |               |
| - Cross-sectional                             | 15 (75)       |
| - Cohort                                      | 5 (25)        |
| <b>Setting, n (%)</b>                         |               |
| - Hospital-based                              | 19 (95)       |
| - Population-based                            | 1 (5)         |
| <b>Sampling</b>                               |               |
| - Non-probabilistic                           | 20 (100)      |
| <b>Methodological quality</b>                 |               |
| <b>Selection of participants, n (%)</b>       |               |
| - Low                                         | 10 (50)       |
| - Moderate                                    | 8 (40)        |
| - High                                        | 2 (10)        |
| <b>Comparability of included group, n (%)</b> |               |
| - Low                                         | 15 (75)       |
| - Moderate                                    | 2 (10)        |
| - High                                        | 3 (15)        |
| <b>Outcome assessment, n (%)</b>              |               |
| - Low                                         | 5 (25)        |
| - Moderate                                    | 5 (25)        |
| - High                                        | 10 (50)       |

Supplementary Table 5. Individual characteristics of included studies investigating the association between active smoking and non-adherence to antiretroviral therapy

| Author         | Year | Design          | Sampling          | Setting        | Period of inclusion | Country         | Definition of non-adherence                                                                                                                                                                                                                                                                                                                                                                                    | Sample | Variables for adjustment                                                                                                                                                                                                                                                                                                                                                                                                                    | Selection | Comparability | Outcome |
|----------------|------|-----------------|-------------------|----------------|---------------------|-----------------|----------------------------------------------------------------------------------------------------------------------------------------------------------------------------------------------------------------------------------------------------------------------------------------------------------------------------------------------------------------------------------------------------------------|--------|---------------------------------------------------------------------------------------------------------------------------------------------------------------------------------------------------------------------------------------------------------------------------------------------------------------------------------------------------------------------------------------------------------------------------------------------|-----------|---------------|---------|
| Sharma         | 2013 | Cross sectional | Non-Probabilistic | Hospital-based | 2011-2012           | Nepal           | Missing of ART regimen (< 95%)                                                                                                                                                                                                                                                                                                                                                                                 | 100    |                                                                                                                                                                                                                                                                                                                                                                                                                                             | Mod       | Low           | Low     |
| Winhusen       | 2018 | Cohort          | Non-Probabilistic | Hospital-based | NR                  | USA             | HIV medication adherence was measured by self-report as the % of pills taken in the last 30 days; "high adherence" was defined as self-reporting taking $\geq 90\%$ of prescribed ART.                                                                                                                                                                                                                         | 623    |                                                                                                                                                                                                                                                                                                                                                                                                                                             | Low       | High          | Low     |
| O'Connor       | 2013 | Cohort          | Non-Probabilistic | Hospital-based | NR                  | SMART Countries | Community Programs for Clinical Research on AIDS Antiretroviral Medication Adherence Self-Report Form (form 065)                                                                                                                                                                                                                                                                                               | 35695  | Study arm, sex, age, ethnicity, mode of transmission, education, residence, calendar year, CD4 count, NRTI, PI, NNRTI in the regimen, No of ART classes experienced, event in past year, history of of AIDS defining illness, concomitant drugs,                                                                                                                                                                                            | Low       | Low           | Low     |
| Bonolo [Women] | 2013 | Cohort          | Non-Probabilistic | Hospital-based | 2001-2002           | Brazil          | Intake of less than 95% of the prescribed number of doses in the last 3 days                                                                                                                                                                                                                                                                                                                                   | 100    | Marital status, Alcohol, Self-reported difficulty for ART, Adverse events, Time between HIV and first ART, education, race, income, job, disclosure of HIV status, lifetime IDU, lifetime illicit drug use, psychological support, understanding medical counseling and ART prescription, Number of pills, CD4 count baseline, CDC classification of clinical presentation, baseline anxiety and depression, self-perceived quality of life | Low       | Low           | Mod     |
| Bonolo [Men]   | 2013 | Cohort          | Non-Probabilistic | Hospital-based | 2001-2002           | Brazil          | Intake of less than 95% of the prescribed number of doses in the last 3 days                                                                                                                                                                                                                                                                                                                                   | 195    | Marital status, Alcohol, Self-reported difficulty for ART, Adverse events, Time between HIV and first ART, education, race, income, job, disclosure of HIV status, lifetime IDU, lifetime illicit drug use, psychological support, understanding medical counseling and ART prescription, Number of pills, CD4 count baseline, CDC classification of clinical presentation, baseline anxiety and depression, self-perceived quality of life | Low       | Low           | Mod     |
| Yuan           | 2006 | Cohort          | Non-Probabilistic | Hospital-based | 1996-2003           | USA             | Non-compliance attributable to patient preference, general non-compliance, including non-compliance on the physician's directive                                                                                                                                                                                                                                                                               | 1341   |                                                                                                                                                                                                                                                                                                                                                                                                                                             | Low       | High          | Low     |
| Jordan         | 2014 | Cross sectional | Non-Probabilistic | Hospital-based | 2005                | VietNam         | Adherence to currently prescribed ART was assessed using the patient's subjective rating on a one-item Likert scale of how well he was able to take all his medications in the past 30 days (perfect, very good, good, fair, or poor).                                                                                                                                                                         | 528    | CD4 count, live alone, drug use last 6 mo, alcohol, duration on ART, ever TB, hepatitis B and C, Bothersome symptoms                                                                                                                                                                                                                                                                                                                        | Mod       | Low           | High    |
| Cioe           | 2017 | Cross sectional | Non-Probabilistic | Hospital-based | 2011-2015           | USA             | An interviewer asked participants to reflect back on the past 30 days, mark memorable events (e.g., vacations, birthdays, paycheck days, parties) on the calendar as anchor points, and then recall day by day whether or not they had missed any doses of their HIV medications. The authors dichotomized 30-day ART adherence at greater than (perfect/near perfect) or less than (imperfect) 95 % adherence | 166    | MSM color, income, education, marital status, drug use, cocaine use, methamphetamine use, popper use, marijuana use, age, timing living with HIV, age at smoking initiation, drinking behaviors                                                                                                                                                                                                                                             | High      | Low           | High    |

|                      |      |                 |                   |                |           |         |                                                                                                                                                                                                                                                                                                                                                                                                                                                                                                                                                                                                                                                                                                                                              |      |                                                                                                                                                                                                                                                                                         |     |     |      |
|----------------------|------|-----------------|-------------------|----------------|-----------|---------|----------------------------------------------------------------------------------------------------------------------------------------------------------------------------------------------------------------------------------------------------------------------------------------------------------------------------------------------------------------------------------------------------------------------------------------------------------------------------------------------------------------------------------------------------------------------------------------------------------------------------------------------------------------------------------------------------------------------------------------------|------|-----------------------------------------------------------------------------------------------------------------------------------------------------------------------------------------------------------------------------------------------------------------------------------------|-----|-----|------|
| <b>Nolan</b>         | 2017 | Cross sectional | Non-Probabilistic | Hospital-based | 2012-2014 | USA     | Self reported past 30-day ART adherence (<90% vs. ≥90%) measured using a validated Visual Analogue Scale (VAS)                                                                                                                                                                                                                                                                                                                                                                                                                                                                                                                                                                                                                               | 200  |                                                                                                                                                                                                                                                                                         | Low | Low | High |
| <b>Batista</b>       | 2014 | Cross sectional | Non-Probabilistic | Hospital-based | 2007-2009 | Brazil  | Self-reported irregular use of combined antiretroviral therapy (cART), categorized in 'yes' - when patients reported a discontinuation of treatment at some point on their own - and 'no'.                                                                                                                                                                                                                                                                                                                                                                                                                                                                                                                                                   | 1380 | Age, use of crack                                                                                                                                                                                                                                                                       | Low | Low | High |
| <b>Peretti-Watel</b> | 2006 | Cross sectional | Non-Probabilistic | Hospital-based | 2003      | France  | Adherence to HAART was assessed with a dichotomous outcome (highly adherent versus non-adherent). Adherence was assessed by four survey questions about dose-taking during the previous 7 days: (1) Did you scrupulously follow prescribed doses of HAART? (2) Did you miss at least one dose during the last week? (3) Did you take the entire daily dose at one time rather than at the prescribed intervals? [This question was eliminated for patients following once-daily regimens.] and (4) Did you fail to follow the prescribed intervals for at least one dose? Patients were defined as highly adherent (versus poorly adherent) if they answered "yes" to the first question and "no" to the second, third, and fourth questions | 2484 | Age, Living with a partner, Being migrant, financial difficulties in household, transmission group, Number of years since HIV diagnosis, HAART adverse effect, Alcohol abuse, Patients on Drug Maintenance therapy, Multiple addictions                                                 | Low | Low | High |
| <b>Soares</b>        | 2019 | Cross sectional | Non-Probabilistic | Hospital-based | 2012-2013 | Brazil  | Nonadherence was defined as intake of less than 90% of the medications prescribed in the last week, considering the number of pills taken by asking the patients and the timetable for each intake                                                                                                                                                                                                                                                                                                                                                                                                                                                                                                                                           | 253  | Age, Physical activity, Disclosure HIV status with partner, Lack of ART. Others: Alcohol, religious activity, illicit drug use, ART regimens, Partner infected with HIV, Number of casual partners over the last 12 months, Casual partners over the last 12 months, Long-term partners | Mod | Low | High |
| <b>Nguyen</b>        | 2016 | Cross sectional | Non-Probabilistic | Hospital-based | 2013      | VietNam | Adherence during the last 30 days was measured by the 100-point visual analog scale (VAS), where 0 indicates complete nonadherence and 100 indicates complete adherence. The established cut point of 95 or above was used to indicate adequate adherence.                                                                                                                                                                                                                                                                                                                                                                                                                                                                                   | 1050 |                                                                                                                                                                                                                                                                                         | Mod | Low | High |
| <b>Degroote</b>      | 2014 | Cross sectional | Non-Probabilistic | Hospital-based | 2012      | Belgium | Simplified Medication Adherence Questionnaire: A patient is considered to be not adherent if one or more of the four first questions were answered affirmatively, if he/she missed more than two doses in the past week or if there were more than 2 days without medication during the past 3 months.                                                                                                                                                                                                                                                                                                                                                                                                                                       | 218  | Sex, Neurocognitive complaints                                                                                                                                                                                                                                                          | Mod | Low | High |
| <b>Camargo</b>       | 2019 | Cross sectional | Non-Probabilistic | Hospital-based | 2014-2017 | Brazil  | Adherence to therapy was evaluated using the Brazilian adaptation of "Assessment of Adherence to Antiretroviral Therapy Questionnaire" (CEAT-VIH), which has 20 self-reported questions. The total score for the questionnaire ranges from 17 to 89 points; the higher the score is the better the adherence, that is, low/insufficient adherence (score <70), intermediate adherence (score between 71 and 78), or optimal/adequate adherence (score >79).                                                                                                                                                                                                                                                                                  | 112  |                                                                                                                                                                                                                                                                                         | Mod | Low | High |
| <b>Wei</b>           | 2015 | Cross sectional | Non-Probabilistic | Hospital-based | 2014      | China   | Self-administrated questionnaire was used to collect the data about HAART compliance                                                                                                                                                                                                                                                                                                                                                                                                                                                                                                                                                                                                                                                         | 276  | demographics, ART status, social support and discrimination, WHO staging, ART side effects                                                                                                                                                                                              | Low | Mod | High |

|                |      |                 |                   |                  |           |         |                                                                                                                                                                                                                                                                                                                                                                                                                                                                                                                                                                                                                                                                                                                                                                                                                            |      |                                                                                                                                                                                                                                                                                                                                                                                                                                                                             |      |      |     |
|----------------|------|-----------------|-------------------|------------------|-----------|---------|----------------------------------------------------------------------------------------------------------------------------------------------------------------------------------------------------------------------------------------------------------------------------------------------------------------------------------------------------------------------------------------------------------------------------------------------------------------------------------------------------------------------------------------------------------------------------------------------------------------------------------------------------------------------------------------------------------------------------------------------------------------------------------------------------------------------------|------|-----------------------------------------------------------------------------------------------------------------------------------------------------------------------------------------------------------------------------------------------------------------------------------------------------------------------------------------------------------------------------------------------------------------------------------------------------------------------------|------|------|-----|
| <b>Cropsey</b> | 2016 | Cross sectional | Non-Probabilistic | Hospital-based   | 2005-2008 | USA     | No missed doses or missed any doses in the past 3 months                                                                                                                                                                                                                                                                                                                                                                                                                                                                                                                                                                                                                                                                                                                                                                   | 2928 |                                                                                                                                                                                                                                                                                                                                                                                                                                                                             | Mod  | High | Low |
| <b>Aye</b>     | 2017 | Cross sectional | Non-Probabilistic | Hospital-based   | 2016      | Maynnar | The authors used the Adult AIDS Clinical Trials Group (AACTG) adherence instrument and 30 days visual analogue scale (VAS) to assess adherence. AACTG is four days recall method for measuring adherence that also assesses reasons of non-adherence. VAS adherence assessment is the Medication Self-report Inventory that can be used to assess adherence to a single antiretroviral medication. Adherence refers to the PLHIV took $\geq 95\%$ of doses taken over the past 30 days. On the other hand, patients with $< 95\%$ of doses taken over the past 30 days, were defined as non-adherence                                                                                                                                                                                                                      | 300  | Gender, age, marital status, education, occupation, duration of ART, CD4 count, line of ART, ART regimen, diagnosis of chronic disease, Information, Motivation and Behavioral skills on adherence information, adherence on motivation, adherence on behavioural skills, alcohol, disclosure, stigma, social support, partner who is not on ART, depression, erectile dysfunction                                                                                          | High | Low  | Mod |
| <b>Silva</b>   | 2015 | Cross sectional | Non-Probabilistic | Hospital-based   | 2010      | Brazil  | This outcome variable was constructed based on the pharmacy's drug dispensation records, according to the dates scheduled for each patient. A seven-day delay per month for the collection of drugs was allowed. For each patient, a binary indicator was constructed with "0" and "1" values to classify adherence status. The "0" value was failure to show up at the pharmacy to collect the drugs prescribed on the scheduled date; the "1" value meant going to the pharmacy on the scheduled date. For each patient, at the completion of a six-month follow-up, an index ranging from 0 to 6 was obtained from the sum of the binary indicator. For analytical purposes, patients were grouped in two categories: "adherence" – for those whose score was $\geq 5$ , and nonadherence" – for those with score $< 5$ | 205  | Sex, Age, Employment status, marital status, sexual orientation, alcohol, use of illicit drugs, CD4 count, clinical status at HAART initiation, number of HAART, type of HAART, adverse drugs                                                                                                                                                                                                                                                                               | Mod  | Low  | Mod |
| <b>Murri</b>   | 2009 | Cross sectional | Non-Probabilistic | Population-based | 2006      | Italy   | Having discontinued therapy for at least 1 day                                                                                                                                                                                                                                                                                                                                                                                                                                                                                                                                                                                                                                                                                                                                                                             | 296  | Age, sex, education, IDU, hepatitis B or C, CD4 count, HIV RNA, PIs, NNRTIs, Number of daily doses, Third or more scheme, number of pills, Missing at least one dose in the previous week, Self-reporting suboptimal adherence (Taking therapy not so well or bad), Uncorrect timing, Believing therapy has "nothing," "poor" or "enough efficacy", Seek for information on AIDS=HIV, Take homeopathic drugs, Physical Health Summary, Mental Health Summary, Symptom score | Low  | Mod  | Mod |

Supplementary Table 6. Sensitivity analysis of prevalence of active smoking in the global population living with HIV undergoing ART

|                                       | Prevalence,<br>% | 95% confidence<br>intervals | N<br>studies | N<br>participants | Heterogeneity      |                    | Egger<br>test |
|---------------------------------------|------------------|-----------------------------|--------------|-------------------|--------------------|--------------------|---------------|
|                                       |                  |                             |              |                   | I <sup>2</sup> , % | P value            |               |
| <b>Global</b>                         | <b>36.1</b>      | <b>33.7-38.5</b>            | <b>329</b>   | <b>462,104</b>    | <b>99.5</b>        | <b>&lt; 0.0001</b> | <b>0.0002</b> |
| - All participants on ART             | 34.5             | 31.8-37.2                   | 268          | 420,575           | 99.6               | < 0.0001           | 0.0001        |
| - Acceptable precision                | 33.7             | 30.1-37.4                   | 132          | 431,453           | 99.8               | < 0.0001           | 0.0007        |
| - Probabilistic sampling              | 31.5             | 26.0-37.3                   | 52           | 25,224            | 98.0               | < 0.0001           | 0.324         |
| - Prospective data collection         | 35.1             | 32.5-37.7                   | 261          | 317,315           | 99.5               | < 0.0001           | < 0.0001      |
| - Response rate $\geq$ 80%            | 35.4             | 32.2-38.8                   | 157          | 193,851           | 99.5               | < 0.0001           | < 0.0001      |
| - Identical data collection procedure | 36.1             | 33.7-38.6                   | 325          | 459,849           | 99.5               | < 0.0001           | 0.0002        |

Supplementary Table 7. Complete cases meta-regression analysis of sources of heterogeneity and factors associated with the variation of prevalence of active tobacco smoking in people living with HIV ongoing antiretroviral therapy

|                                             | N studies | N participants | Univariable model                                |          |                | Multivariable model                                       |          |          |
|---------------------------------------------|-----------|----------------|--------------------------------------------------|----------|----------------|-----------------------------------------------------------|----------|----------|
|                                             | N = 329   | N = 462,104    | Prevalence difference (95% confidence intervals) | P value  | R <sup>2</sup> | Adjusted prevalence difference (95% confidence intervals) | P value  | LR test  |
| <b>Country level of income</b>              |           |                |                                                  | < 0.0001 | 39.4%          |                                                           |          | 0.023    |
| - Low                                       | 30        | 11,329         | Ref                                              |          |                | Ref                                                       |          |          |
| - Lower-Middle                              | 21        | 9,858          | 9.1 (-1.4; 20.7)                                 | 0.091    |                | -0.7 (-4.3; 3.0)                                          | 0.916    |          |
| - Upper-Middle                              | 39        | 8,252          | 25.9 (15.4; 37.2)                                | < 0.0001 |                | 10.0 (6.3; 13.9)                                          | 0.092    |          |
| - High                                      | 216       | 339,022        | 51.2 (41.1; 62.0)                                | < 0.0001 |                | 13.8 (9.2; 18.6)                                          | 0.047    |          |
| - Multi-region                              | 23        | 93,643         | 26.4 (14.7; 39.4)                                | < 0.0001 |                | -2.0 (-6.3; 2.5)                                          | 0.776    |          |
| <b>UNAIDS</b>                               |           |                |                                                  | < 0.0001 | 45.3%          |                                                           |          | < 0.0001 |
| - West and Central Europe and North America | 203       | 293,547        | Ref                                              |          |                | Ref                                                       |          |          |
| - West and Central Africa                   | 12        | 4,868          | -40.9 (-46.5; -34.6)                             | < 0.0001 |                | -32.0 (-35.1; -28.8)                                      | < 0.0001 |          |
| - Eastern and Southern Africa               | 34        | 12,676         | -33.3 (-37.4; -29.0)                             | < 0.0001 |                | -26.0 (-28.9; -22.9)                                      | < 0.0001 |          |
| - Eastern Europe and Central Asia           | 2         | 264            | -2.2 (-23.3; 24.6)                               | 0.865    |                | 5.5 (-2.6; 14.4)                                          | 0.650    |          |
| - Latin America and the Caribbean           | 24        | 16,385         | -16.0 (-21.9; -9.6)                              | < 0.0001 |                | -13.9 (-17.1; -10.6)                                      | 0.020    |          |
| - Asia and the Pacific                      | 27        | 16,352         | -12.4 (-18.2; -6.0)                              | 0.0002   |                | -4.9 (-7.6; -2.1)                                         | 0.388    |          |
| - Middle East and North Africa              | 3         | 320            | -12.0 (-28.1; 7.6)                               | 0.212    |                | -10.9 (-17.1; -4.3)                                       | 0.401    |          |
| - Multi-region                              | 24        | 117,692        | -11.5 (-17.7; -4.9)                              | 0.0009   |                | -4.0 (-7.1; -0.9)                                         | 0.622    |          |
| <b>% of males</b>                           |           |                |                                                  |          | 14.0%          |                                                           |          |          |
| - Increase of 10%                           | 301       | 446,434        | 3.4 (2.4-4.4)                                    | < 0.0001 |                |                                                           |          |          |
| <b>Duration since diagnostic infection</b>  |           |                |                                                  |          | 9.4%           |                                                           |          |          |
| - By increase of 5 years                    | 119       | 68,194         | 12.5 (5.2-20.3)                                  | 0.0006   |                |                                                           |          |          |
| <b>Duration of antiretroviral therapy</b>   |           |                |                                                  |          | 0.2%           |                                                           |          |          |
| - By increase of 5 years                    | 98        | 117,811        | 2.7 (-0.9; 15.3)                                 | 0.625    |                |                                                           |          |          |
| <b>Mean age</b>                             |           |                |                                                  |          | 3.4%           |                                                           |          |          |
| - By increase of 10 years                   | 290       | 380,280        | 6.2 (2.3-10.3)                                   | 0.0018   |                |                                                           |          |          |
| <b>Response rate</b>                        |           |                |                                                  |          | 0.1%           |                                                           |          |          |
| - < 80% or not described                    | 172       | 268,253        | Ref                                              |          |                |                                                           |          |          |
| - ≥ 80%                                     | 157       | 193,851        | -1.2 (-6.1; 3.8)                                 | 0.628    |                |                                                           |          |          |
| <b>Sampling method</b>                      |           |                |                                                  |          | 0.9%           |                                                           |          |          |

|                                               |     |         |                    |       |      |  |  |
|-----------------------------------------------|-----|---------|--------------------|-------|------|--|--|
| - Non probabilistic                           | 277 | 436,880 | Ref                |       |      |  |  |
| - Probabilistic                               | 52  | 25,224  | -5.5 (-11.8; 1.1)  | 0.102 |      |  |  |
| <b>Timing of data collection and analysis</b> |     |         |                    | 0.238 | 1.3% |  |  |
| - Prospectively                               | 261 | 317,315 | Ref                |       |      |  |  |
| - Retrospectively                             | 50  | 129,628 | 4.6 (-2.4; 12.2)   | 0.205 |      |  |  |
| - Both                                        | 1   | 957     | 42.4 (-8.7; 122.2) | 0.119 |      |  |  |
| - Unclear                                     | 17  | 14,204  | 4.0 (-7.1; 16.5)   | 0.493 |      |  |  |
| <b>Precision</b>                              |     |         |                    |       | 0.8% |  |  |
| - Low                                         | 197 | 30,651  | Ref                |       |      |  |  |
| - Acceptable                                  | 132 | 431,453 | -4.1 (-8.9; 0.8)   | 0.102 |      |  |  |

ART: antiretroviral therapy; UNAIDS: Joint United Program on HIV; NA: not applicable; LR: likelihood ratio

\*Missing data were imputed



Supplementary Figure 1. PRISMA flow chart

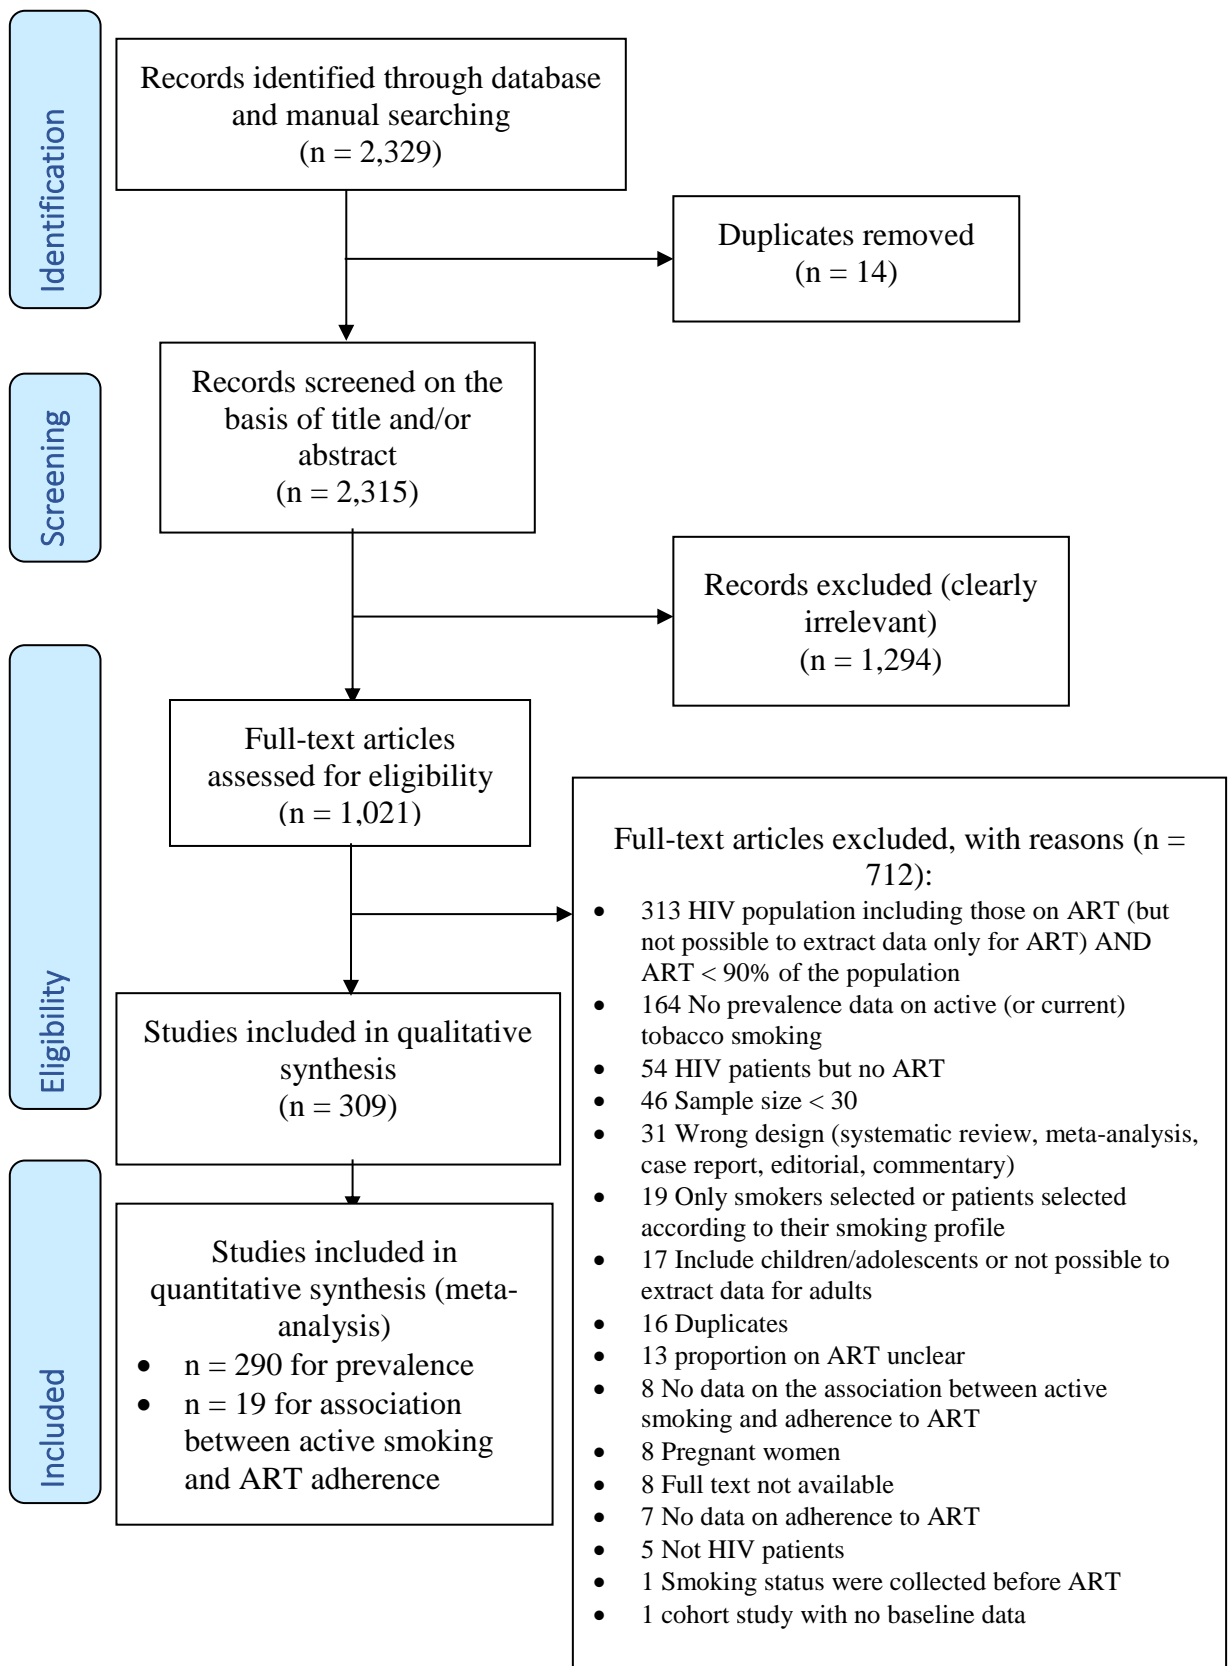

Supplementary Figure 2. Funnel plot for meta-analysis of prevalence of active smoking in people undergoing antiretroviral therapy

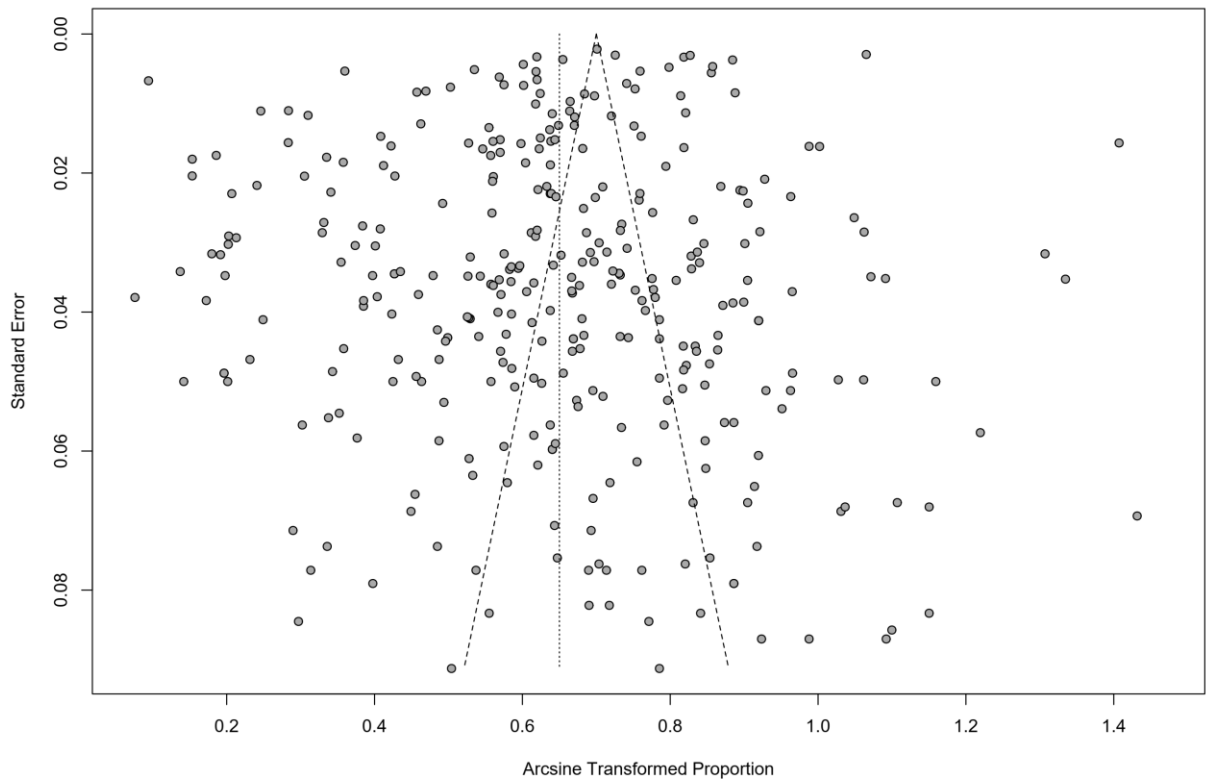

Supplementary Figure 3. Meta-analysis prevalence of active tobacco smoking in people living with HIV undergoing antiretroviral therapy in Asia and Pacific

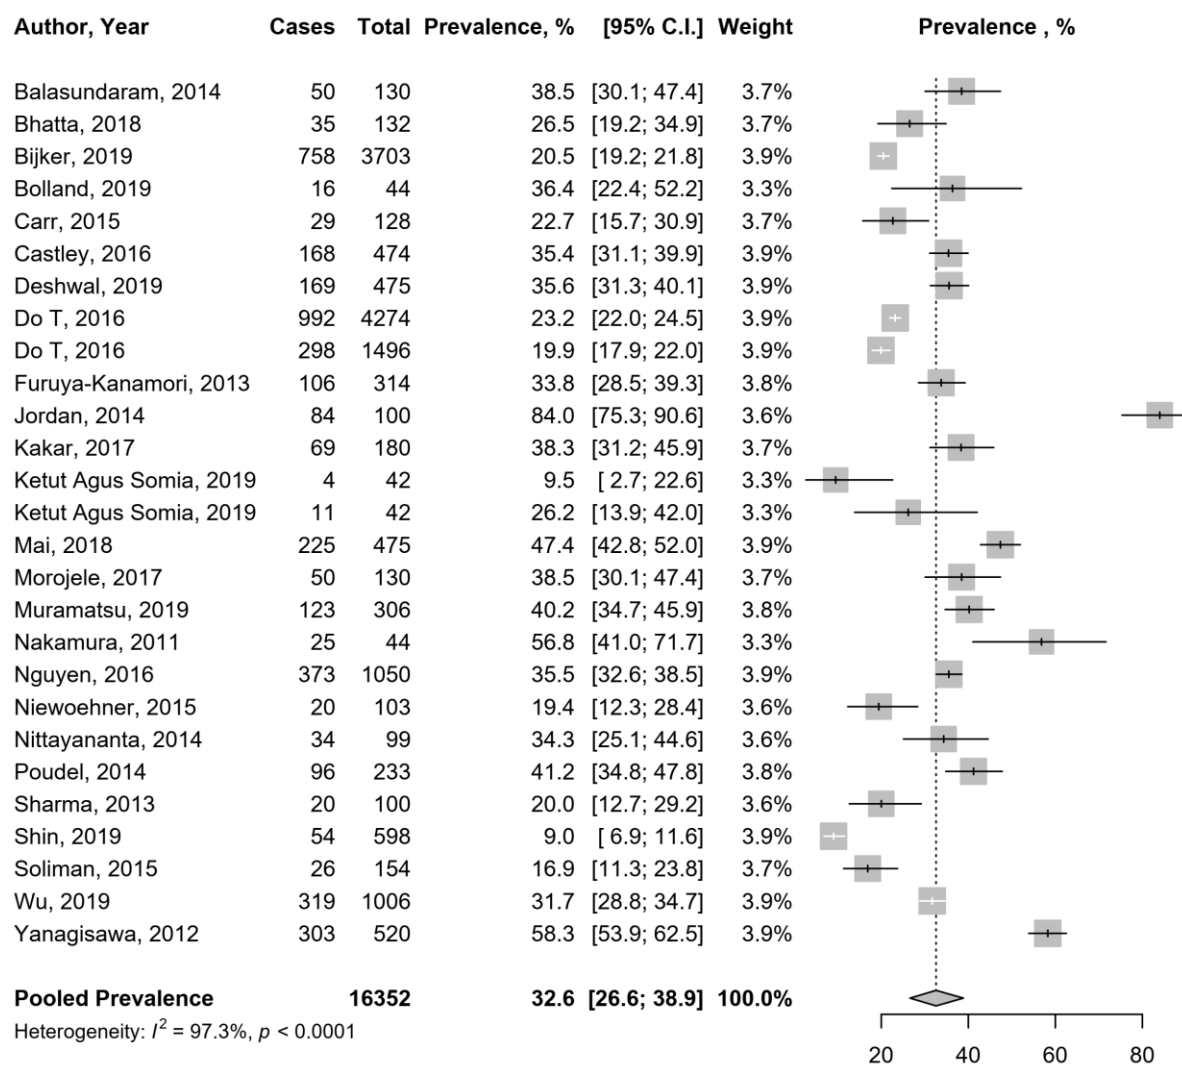

Supplementary Figure 4. Meta-analysis prevalence of active tobacco smoking in people living with HIV undergoing antiretroviral therapy in Eastern and Southern Africa

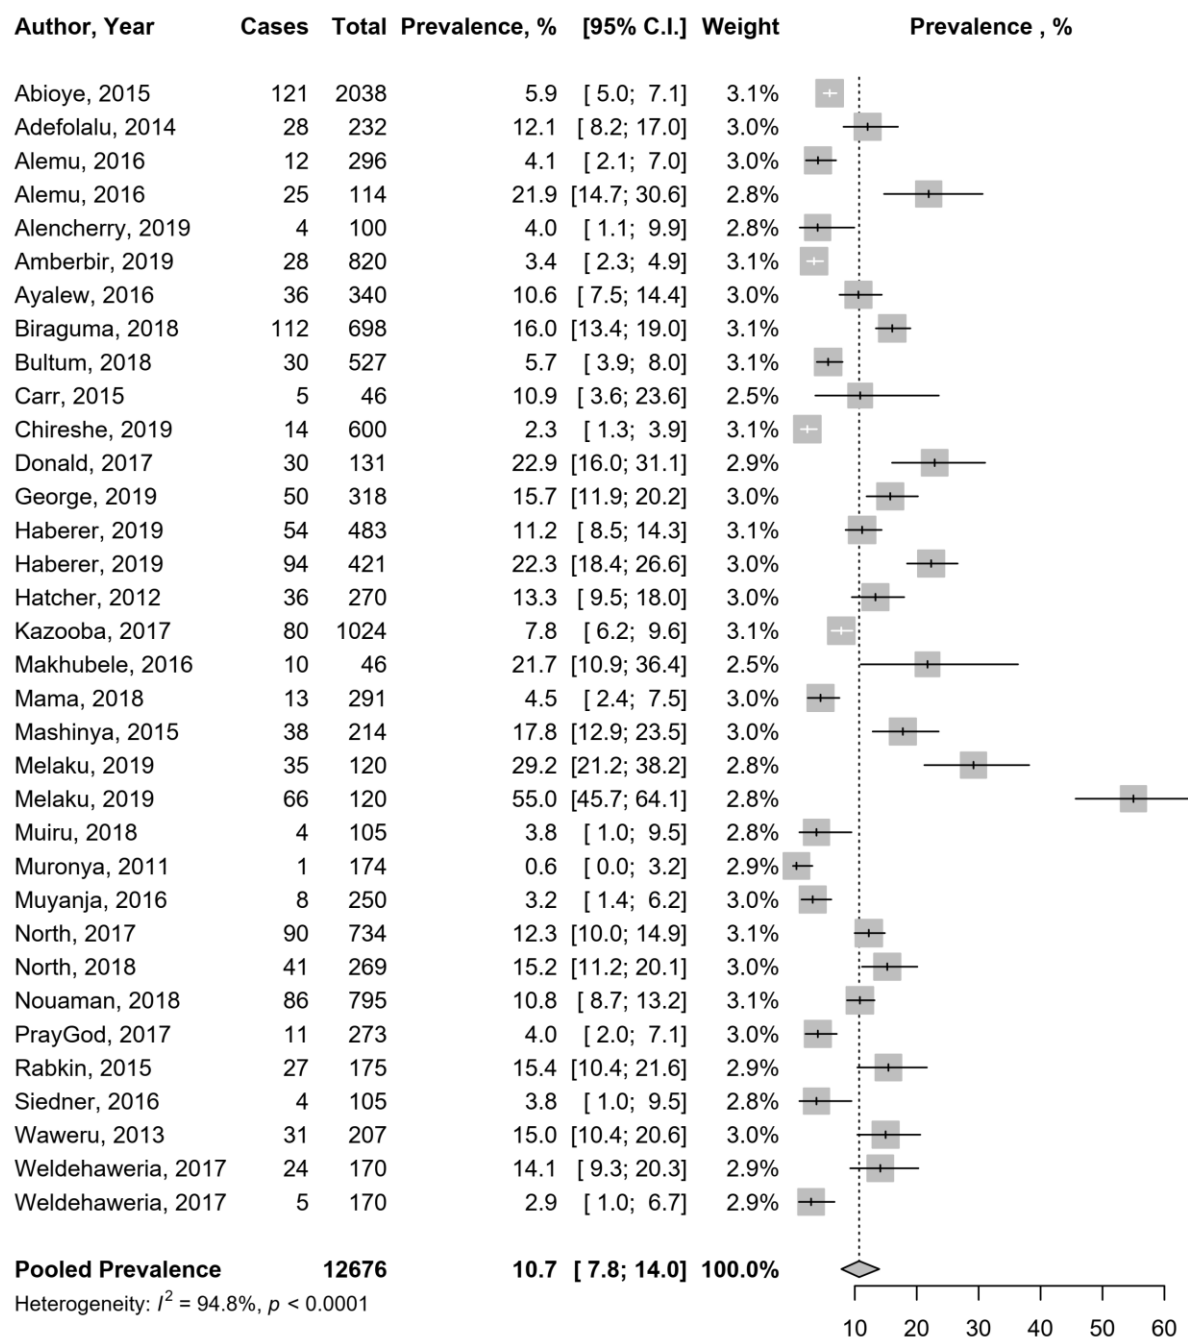

Supplementary Figure 5. Meta-analysis prevalence of active tobacco smoking in people living with HIV undergoing antiretroviral therapy in Eastern Europe and Central Asia

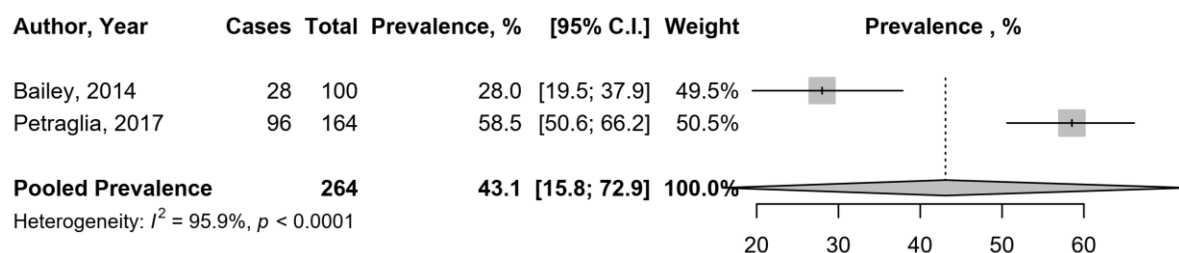

Supplementary Figure 6. Meta-analysis prevalence of active tobacco smoking in people living with HIV undergoing antiretroviral therapy in Latin America and the Caribbean

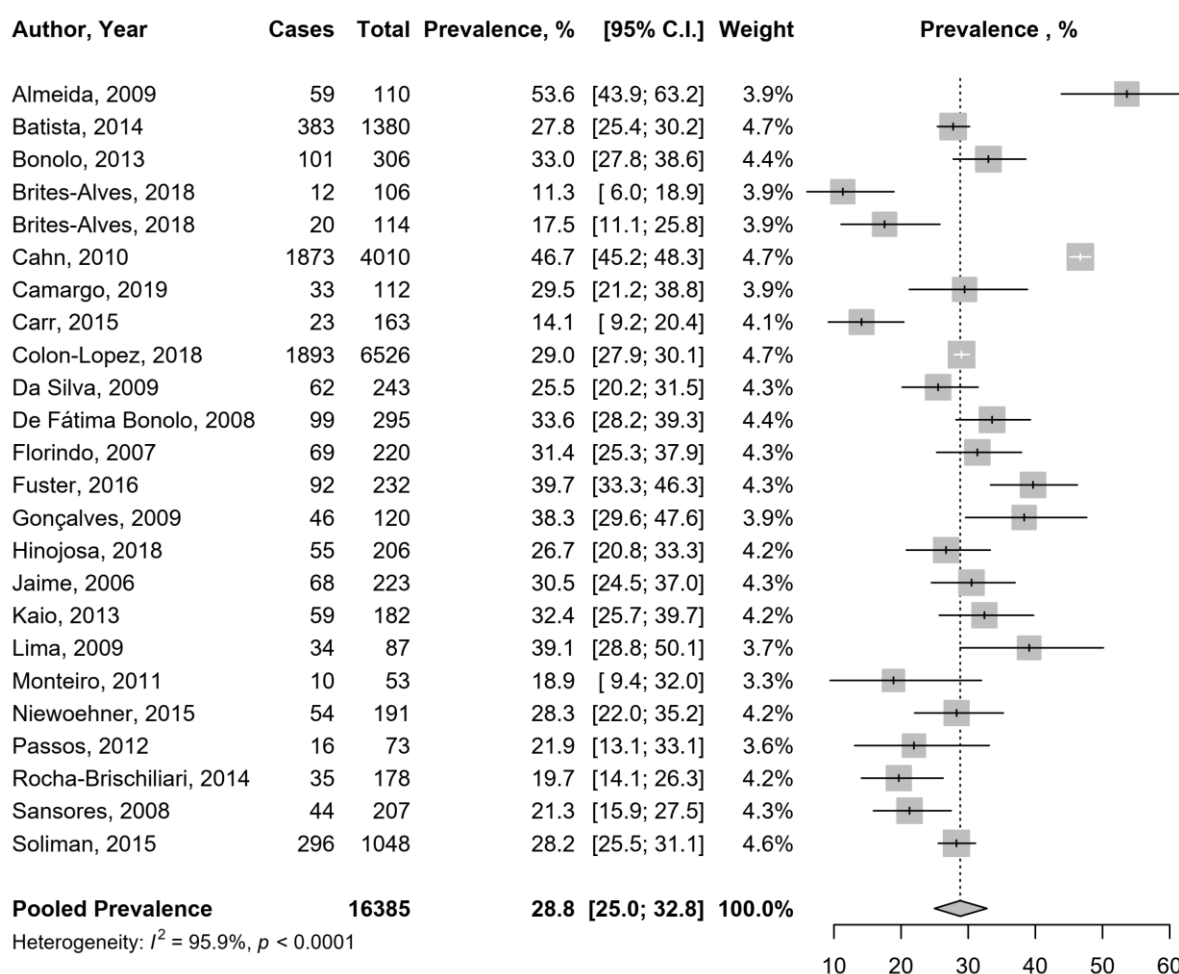

Supplementary Figure 7. Meta-analysis prevalence of active tobacco smoking in people living with HIV undergoing antiretroviral therapy in Middle-East and North Africa

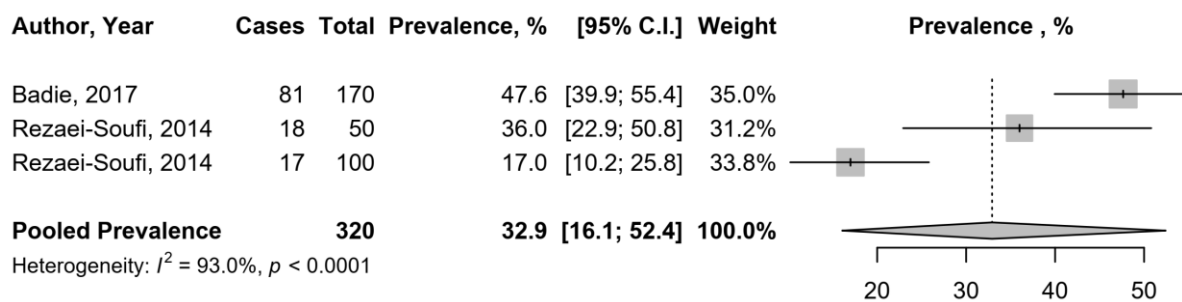

Supplementary Figure 8. Meta-analysis prevalence of active tobacco smoking in people living with HIV undergoing antiretroviral therapy in West and Central Africa

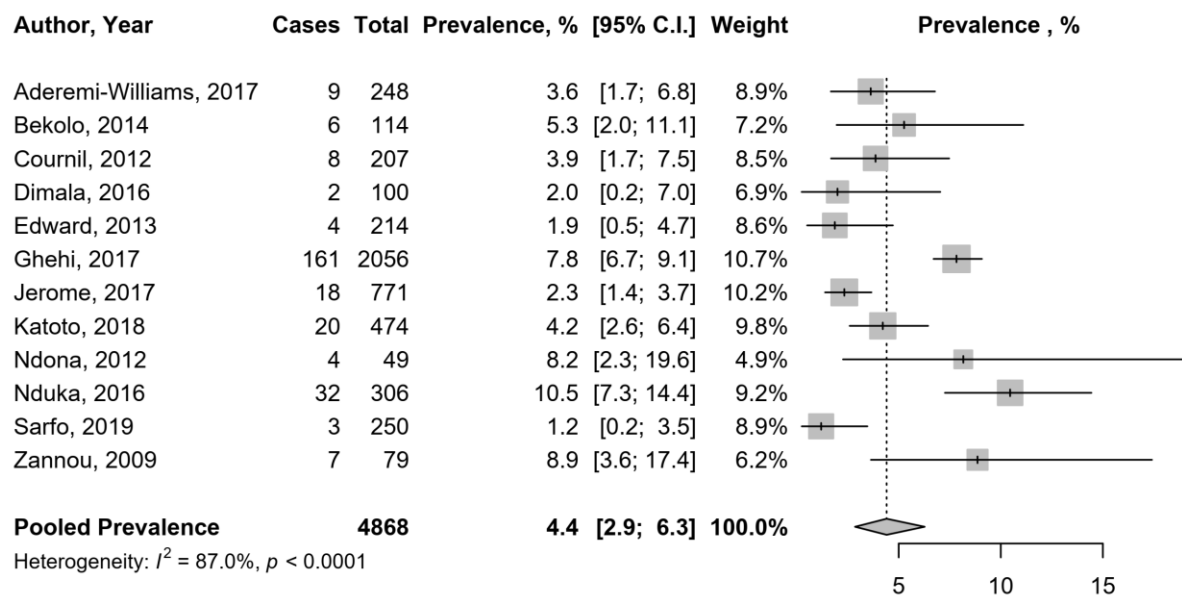

Supplementary Figure 9. Meta-analysis prevalence of active tobacco smoking in people living with HIV undergoing antiretroviral therapy in West and Central Europe and North America

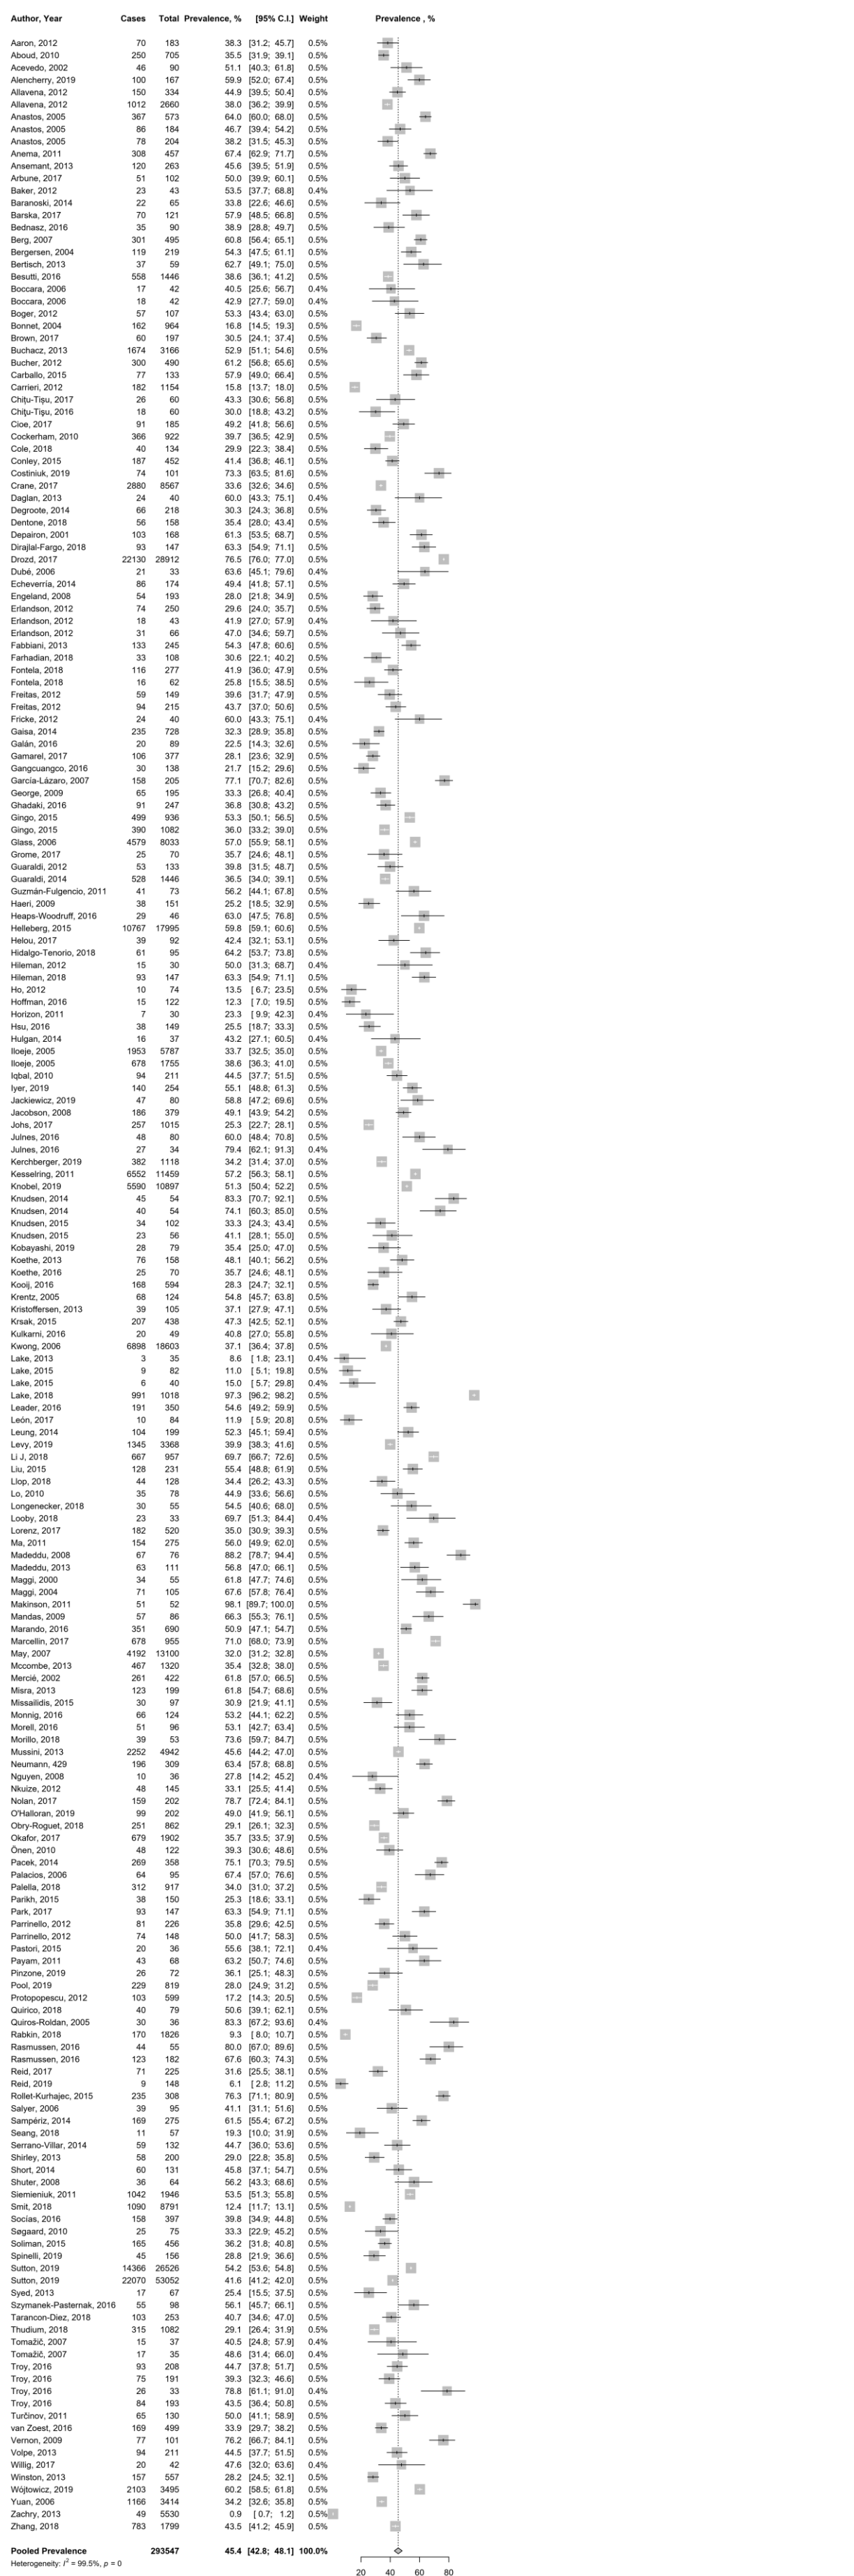



Supplementary Figure 10. Funnel plot of the meta-analysis of association between exposure to active smoking and non-adherence to antiretroviral therapy in people living with HIV, crude analysis

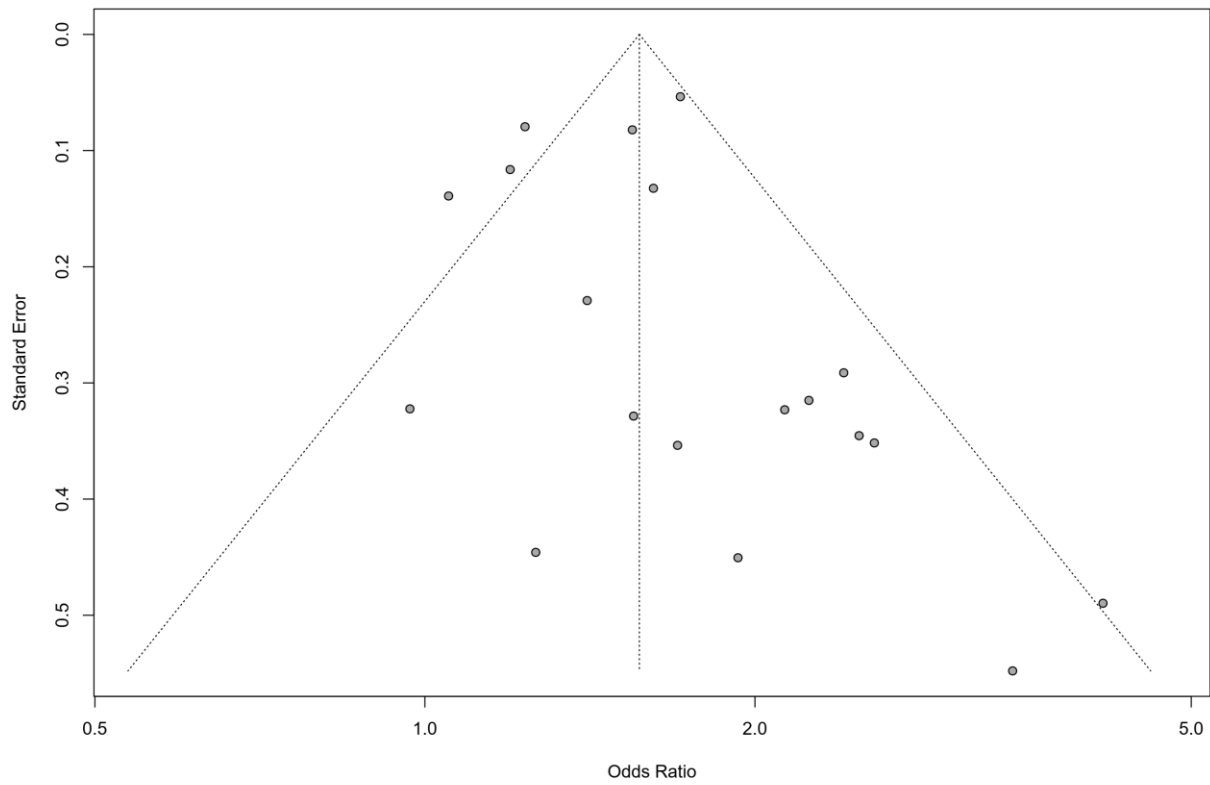

Supplementary Figure 11. Funnel plot of the meta-analysis of association between exposure to active smoking and non-adherence to antiretroviral therapy in people living with HIV, adjusted analysis

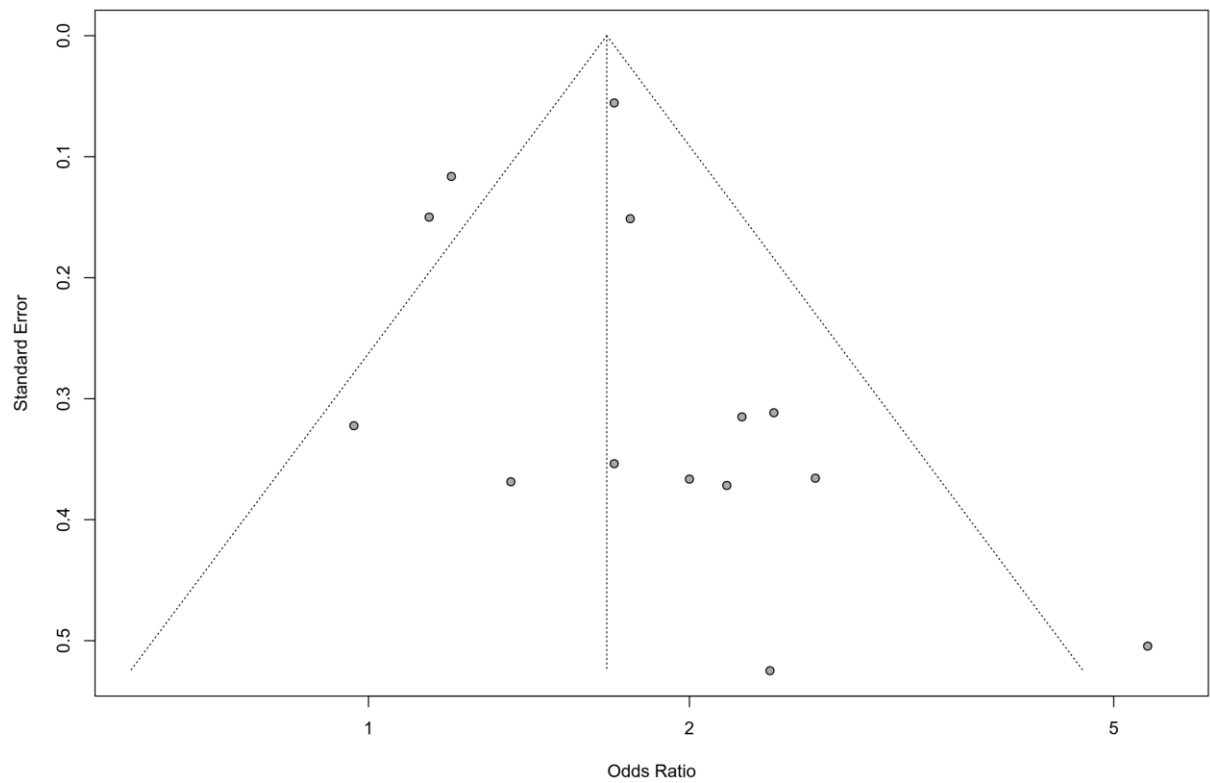



*Supplementary References 1. Articles included in the meta-analysis prevalence of active smoking in the global population undergoing antiretroviral therapy*

Degroote S., D., Vogelaers, P., Vermeir, A., Mariman, A., De Rick, B., Van Der Gucht, et al.  
Determinants of adherence in a cohort of Belgian HIV patients: A pilot study.  
*Acta Clin Belg.* 2014;69(2):111-5.

Chițu-Tișu C.E., E.C., Barbu, M., Lazăr, M., Bojincă, A.-M., Tudor, A., Hristea, et al.  
Body composition in HIV-infected patients receiving highly active antiretroviral therapy.  
*Acta Clin Belg Int J Clin Lab Med.* 2017;72(1):55-62.

Gamarel K.E., T.B., Neilands, A.A., Conroy, S.E., Dilworth, N., Lisha, J.M., Taylor, et al.  
A longitudinal study of persistent smoking among HIV-positive gay and bisexual men in primary relationships.  
*Addict Behav.* 2017;66:118-24.

Chireshe R., K., Naidoo, R., Nyamakura.  
Hypertension among human immunodeficiency virus infected patients on treatment at Parirenyatwa Hospital: A descriptive study.  
*Afr J Prim Health Care Fam Med.* 2019;11(1):e1-e8.

Knudsen A., T.L., Katzenstein, T., Benfield, N.R., Jørgensen, G., Kronborg, J., Gerstoft, et al.  
Plasma plasminogen activator inhibitor-1 predicts myocardial infarction in HIV-1-infected individuals.  
*AIDS.* 2014;28(8):1171-9.

Wójtowicz A., S., Bibert, P., Taffé, E., Bernasconi, H., Furrer, H.F., Günthard, et al.  
IL-4 polymorphism influences susceptibility to *Pneumocystis jirovecii* pneumonia in HIV-positive patients.  
*AIDS.* 2019;33(11):1719-27.

Longenecker C.T., C.E., Sullivan, J., Morrison, C.O., Hileman, D.A., Zidar, R., Gilkeson, et al.  
The effects of HIV and smoking on aortic and splenic inflammation.  
*AIDS.* 2018;32(1):89-94.

Grint D., L., Peters, J.K., Rockstroh, S., De Wit, V.M., Mitsura, B., Knysz, et al.  
Increased incidence of antiretroviral drug discontinuation among patients with viremic hepatitis C virus coinfection and high hyaluronic acid, a marker of liver fibrosis.  
*AIDS.* 2014;28(4):577-87.

Hsu D.C., Y.F., Ma, S., Hur, D., Li, A., Rupert, R., Scherzer, et al.  
Plasma IL-6 levels are independently associated with atherosclerosis and mortality in HIV-infected individuals on suppressive antiretroviral therapy.  
*AIDS.* 2016;30(13):2065-74.

Boccarda F., T., Simon, K., Lacombe, A., Cohen, B., Laloux, E., Bozec, et al.  
Influence of pravastatin on carotid artery structure and function in dyslipidemic HIV-infected patients receiving antiretroviral therapy.  
*AIDS.* 2006;20(18):2395-8.

Palella F.J., X., Li, S.K., Gupta, M.M., Estrella, J.P., Phair, J.B., Margolick, et al.  
Long-Term kidney function, proteinuria, and associated risks among HIV-infected and uninfected men.  
*AIDS.* 2018;32(10):1247-56.

Kwong G.P.S., A.C., Ghani, R.A., Rode, L.M., Bartley, B.J., Cowling, B., Da Silva, et al.  
Comparison of the risks of atherosclerotic events versus death from other causes associated with antiretroviral use.  
*AIDS.* 2006;20(15):1941-50.

Lo J., S., Abbara, L., Shturman, A., Soni, J., Wei, J.A., Rocha-Filho, et al.  
Increased prevalence of subclinical coronary atherosclerosis detected by coronary computed tomography angiography in HIV-infected men.  
*AIDS.* 2010;24(2):243-53.

Ho J.E., R., Scherzer, F.M., Hecht, K., Maka, V., Selby, J.N., Martin, et al.

- The association of CD4+ T-cell counts and cardiovascular risk in treated HIV disease.  
AIDS. 2012;26(9):1115-20.
- O'Halloran J.A., S.A., Cooley, J.F., Strain, A., Boerwinkle, R., Paul, R.M., Presti, et al.  
Altered neuropsychological performance and reduced brain volumetrics in people living with HIV on integrase strand transfer inhibitors.  
AIDS. 2019;33(9):1477-83.
- Ho J.E., R., Scherzer, F.M., Hecht, K., Maka, V., Selby, J.N., Martin, et al.  
The association of CD4+ T-cell counts and cardiovascular risk in treated HIV disease.  
AIDS. 2012;26(9):1115-20.
- Lake J.E., X., Li, F.J., Palella, K.M., Erlandson, D., Wiley, L., Kingsley, et al.  
Metabolic health across the BMI spectrum in HIV-infected and HIV-uninfected men.  
AIDS. 2018;32(1):49-57.
- Koethe J.R., H., Grome, C.A., Jenkins, S.A., Kalams, T.R., Sterling.  
The metabolic and cardiovascular consequences of obesity in persons with HIV on long-term antiretroviral therapy.  
AIDS. 2016;30(1):83-91.
- Kooij K.W., F.W.N.M., Wit, J., Schouten, M., Van Der Valk, M.H., Godfried, I.G., Stolte, et al.  
HIV infection is independently associated with frailty in middle-aged HIV type 1-infected individuals compared with similar but uninfected controls.  
AIDS. 2016;30(2):241-50.
- Ryom L., J.D., Lundgren, M., Law, O., Kirk, W., El-Sadr, F., Bonnet, et al.  
Serious clinical events in HIV-positive persons with chronic kidney disease (CKD).  
AIDS. 2019.
- Tarancon-Diez L., R.S., De Pablo-Bernal, J.L., Jiménez, A.I., Álvarez-Ríos, M., Genebat, I., Rosado-Sánchez, et al.  
Role of toll-like receptor 4 Asp299Gly polymorphism in the development of cardiovascular diseases in HIV-infected patients.  
AIDS. 2018;32(8):1035-41.
- Conley L.J., T.J., Bush, A.W., Rupert, I., Sereti, P., Patel, J.T., Brooks, et al.  
Obesity is associated with greater inflammation and monocyte activation among HIV-infected adults receiving antiretroviral therapy.  
AIDS. 2015;29(16):2201-7.
- Depairon M., S., Chessex, P., Sudre, N., Rodondi, N., Doser, J.-P., Chave, et al.  
Premature atherosclerosis in hiv-infected individuals focus on protease inhibitor therapy.  
AIDS. 2001;15(3):329-34.
- Gaisa M., K., Sigel, J., Hand, S., Goldstone.  
High rates of anal dysplasia in HIV-infected men who have sex with men, women, and heterosexual men.  
AIDS. 2014;28(2):215-22.
- Helleberg M., M.T., May, S.M., Ingle, F., Dabis, P., Reiss, G., Fätkenheuer, et al.  
Smoking and life expectancy among HIV-infected individuals on antiretroviral therapy in Europe and North America.  
AIDS. 2015;29(2):221-9.
- Rabkin M., A., Palma, M.L., McNairy, A.B., Gachuhi, S., Simelane, H., Nuwagaba-Biribonwoha, et al.  
Integrating cardiovascular disease risk factor screening into HIV services in Swaziland: Lessons from an implementation science study.  
AIDS. 2018;32:S43-S6.
- Shahmanesh M., A., Schultze, F., Burns, O., Kirk, J., Lundgren, C., Mussini, et al.

- The cardiovascular risk management for people living with HIV in Europe: How well are we doing?  
AIDS. 2016;30(16):2505-18.
- Spinelli M.A., N.A., Hessol, S., Schwarcz, L., Hsu, M.-K., Parisi, S., Pipkin, et al.  
Homelessness at diagnosis is associated with death among people with HIV in a population-based study of a US city.  
AIDS. 2019;33(11):1789-94.
- Søgaard O.S., H.C., Schønheyder, A.R., Bukh, Z.B., Harboe, T.A., Rasmussen, L., Østergaard, et al.  
Pneumococcal conjugate vaccination in persons with HIV: The effect of highly active antiretroviral therapy.  
AIDS. 2010;24(9):1315-22.
- Maggi P., A., Lillo, F., Perilli, R., Maserati, A., Chirianni.  
Colour-Doppler ultrasonography of carotid vessels in patients treated with antiretroviral therapy: A comparative study.  
AIDS. 2004;18(7):1023-8.
- Maggi P., G., Serio, G., Epifani, G., Fiorentino, A., Saracino, C., Fico, et al.  
Premature lesions of the carotid vessels in HIV-1-infected patients treated with protease inhibitors.  
AIDS. 2000;14(16):F123-F8.
- Crane H.M., M.E., McCaul, G., Chander, H., Hutton, R.M., Nance, J.A.C., Delaney, et al.  
Prevalence and Factors Associated with Hazardous Alcohol Use Among Persons Living with HIV Across the US in the Current Era of Antiretroviral Treatment.  
AIDS Behav. 2017;21(7):1914-25.
- Pacek L.R., C., Latkin, R.M., Crum, E.A., Stuart, A.R., Knowlton.  
Current cigarette smoking among HIV-positive current and former drug users: associations with individual and social characteristics.  
AIDS Behav. 2014;18(7):1368-77.
- Cioe P.A., K.E., Gamarel, D.W., Pantalone, P.M., Monti, K.H., Mayer, C.W., Kahler.  
Cigarette Smoking and Antiretroviral Therapy (ART) Adherence in a Sample of Heavy Drinking HIV-Infected Men Who Have Sex with Men (MSM).  
AIDS Behav. 2017;21(7):1956-63.
- Zhang Y., T.E., Wilson, A., Adedimeji, D., Merenstein, J., Milam, J., Cohen, et al.  
The Impact of Substance Use on Adherence to Antiretroviral Therapy Among HIV-Infected Women in the United States.  
AIDS Behav. 2018;22(3):896-908.
- Anema A., S.D., Weiser, K.A., Fernandes, E., Ding, E.K., Brandson, A., Palmer, et al.  
High prevalence of food insecurity among HIV-infected individuals receiving HAART in a resource-rich setting.  
AIDS Care Psychol Socio-Med Asp AIDS HIV. 2011;23(2):221-30.
- Abioye A.I., S., Isanaka, E., Liu, R.S., Mwiru, R.A., Noor, D., Spiegelman, et al.  
Gender differences in diet and nutrition among adults initiating antiretroviral therapy in Dar es Salaam, Tanzania.  
AIDS Care Psychol Socio-Med Asp AIDS HIV. 2015;27(6):706-15.
- Ghadaki B., N., Kronfli, T., Vanniyasingam, S., Haider.  
Chronic obstructive pulmonary disease and HIV: are we appropriately screening?  
AIDS Care Psychol Socio-Med Asp AIDS HIV. 2016;28(10):1338-43.
- Marando F., G., Gualberti, A.M., Costanzo, U., Di Luzio Paparatti, M., Franzetti, A., Ammassari, et al.  
Discrepancies between physician's perception of depression in HIV patients and self-reported CES-D-20 assessment: The DHIVA study.  
AIDS Care Psychol Socio-Med Asp AIDS HIV. 2016;28(2):147-59.
- Monnig M.A., C.W., Kahler, H., Lee, D.W., Pantalone, K.H., Mayer, R.A., Cohen, et al.  
Effects of smoking and alcohol use on neurocognitive functioning in heavy drinking, HIV-positive men who have sex with men.

AIDS Care Psychol Socio-Med Asp AIDS HIV. 2016;28(3):300-5.

Nguyen N.T.P., B.X., Tran, L.Y., Hwang, C.M., Markham, M.D., Swartz, J.I., Vidrine, et al.  
Effects of cigarette smoking and nicotine dependence on adherence to antiretroviral therapy among HIV-positive patients in Vietnam.  
AIDS Care Psychol Socio-Med Asp AIDS HIV. 2016;28(3):359-64.

Nolan S., A.Y., Walley, T.C., Heeren, G.J., Patts, A.S., Ventura, M.M., Sullivan, et al.  
HIV-infected individuals who use alcohol and other drugs, and virologic suppression.  
AIDS Care Psychol Socio-Med Asp AIDS HIV. 2017;29(9):1129-36.

Muyanja D., C., Muzoora, A., Muyingo, W., Muyindike, M.J., Siedner.  
High Prevalence of Metabolic Syndrome and Cardiovascular Disease Risk among People with HIV on Stable ART in Southwestern Uganda.  
AIDS Patient Care STDs. 2016;30(1):4-10.

Shirley D.K., R.K., Kesari, M.J., Glesby.  
Factors associated with smoking in HIV-infected patients and potential barriers to cessation.  
AIDS Patient Care STDs. 2013;27(11):604-12.

Leung J.M., J.C., Liu, A., Mtambo, D., Ngan, N., Nashta, S., Guillemi, et al.  
The determinants of poor respiratory health status in adults living with human immunodeficiency virus infection.  
AIDS Patient Care STDs. 2014;28(5):240-7.

Krsak M., D.M., Kent, N., Terrin, C., Holcroft, S.C., Skinner, C., Wanke.  
Myocardial Infarction, Stroke, and Mortality in cART-Treated HIV Patients on Statins.  
AIDS Patient Care STDs. 2015;29(6):307-13.

Reid M.J.A., Y., Ma, I., Golovaty, S., Okello, R., Sentongo, M., Feng, et al.  
Association of Gut Intestinal Integrity and Inflammation with Insulin Resistance in Adults Living with HIV in Uganda.  
AIDS Patient Care STDs. 2019;33(7):299-307.

Donald K.A.M., A., Fernandez, K., Claborn, C., Kuo, N., Koen, H., Zar, et al.  
The developmental effects of HIV and alcohol: a comparison of gestational outcomes among babies from South African communities with high prevalence of HIV and alcohol use.  
AIDS Res Ther. 2017;14(1):28.

Camargo C.C., N.R.V., Cavassan, K.I., Tasca, S., Meneguín, H.A., Miot, L.R., Souza.  
Depression and Coping Are Associated with Failure of Adherence to Antiretroviral Therapy Among People Living with HIV/AIDS.  
AIDS Res Hum Retroviruses. 2019.

Hileman C.O., D.A., Wohl, D.J., Tisch, S.M., Debanne, G.A., McComsey.  
Short communication: Initiation of an abacavir-containing regimen in HIV-infected adults is associated with a smaller decrease in inflammation and endothelial activation markers compared to non-abacavir-containing regimens.  
AIDS Res Hum Retroviruses. 2012;28(12):1561-4.

Hileman C.O., G.A., McComsey.  
Short Communication: The Effect of Rosuvastatin on Vascular Disease Differs by Smoking Status in Treated HIV Infection.  
AIDS Res Hum Retroviruses. 2018;34(3):282-5.

Morell E.B., J.S., Cabeza, A., Muñoz, I., Marín, M., Masiá, F., Gutiérrez, et al.  
The CD4/CD8 Ratio is Inversely Associated with Carotid Intima-Media Thickness Progression in Human Immunodeficiency Virus-Infected Patients on Antiretroviral Treatment.  
AIDS Res Hum Retroviruses. 2016;32(7):648-53.

Grome H.N., L., Barnett, C.C., Hagar, D.G., Harrison, S.A., Kalams, J.R., Koethe.

- Association of T Cell and Macrophage Activation with Arterial Vascular Health in HIV.  
AIDS Res Hum Retroviruses. 2017;33(2):181-6.
- Koethe J.R., K., Dee, A., Bian, A., Shintani, M., Turner, S., Bebawy, et al.  
Circulating interleukin-6, soluble CD14, and other inflammation biomarker levels differ between obese and nonobese HIV-infected adults on antiretroviral therapy.  
AIDS Res Hum Retroviruses. 2013;29(7):1019-25.
- Levy M.E., A.E., Greenberg, M., Magnus, N., Younes, A., Castel.  
Immunosuppression and HIV Viremia Associated with More Atherogenic Lipid Profile in Older People with HIV.  
AIDS Res Hum Retroviruses. 2019;35(1):81-91.
- Hoffman R.M., J.E., Lake, H.M., Wilhalme, C.-H., Tseng, J.S., Currier.  
Vitamin D levels and markers of inflammation and metabolism in HIV-infected individuals on suppressive antiretroviral therapy.  
AIDS Res Hum Retroviruses. 2016;32(3):247-54.
- Seang S., T., Kelesidis, D., Huynh, S., Park, A.A., Moe, J.S., Currier, et al.  
Low Levels of Endothelial Progenitor Cells and Their Association with Systemic Inflammation and Monocyte Activation in Older HIV-Infected Men.  
AIDS Res Hum Retroviruses. 2018;34(1):39-45.
- Syed S.S., R.S., Balluz, E.K., Kabagambe, W.A., Meyer, S., Lukas, C.M., Wilson, et al.  
Assessment of biomarkers of cardiovascular risk among HIV type 1-infected adolescents: Role of soluble vascular cell adhesion molecule as an early indicator of endothelial inflammation.  
AIDS Res Hum Retroviruses. 2013;29(3):493-500.
- Carballo D., C., Delhumeau, S., Carballo, C., Bähler, D., Radovanovic, B., Hirschel, et al.  
Increased mortality after a first myocardial infarction in human immunodeficiency virus-infected patients; a nested cohort study.  
AIDS Res Ther. 2015;12(1).
- Mashinya F., M., Alberts, J.-P., Van geertruyden, R., Colebunders.  
Assessment of cardiovascular risk factors in people with HIV infection treated with ART in rural South Africa: A cross sectional study.  
AIDS Res Ther. 2015;12(1).
- Hidalgo-Tenorio C., S.E., de Jesus, J., Esquivias, J., Pasquau.  
High prevalence and incidence of HPV-related anal cancer precursor lesions in HIV-positive women in the late HAART era.  
Alta prevalencia e incidencia de lesiones precursoras de cáncer anal asociada a la infección por VPH en mujeres VIH positivas en la era tardía del TAR. 2018;36(9):555-62.
- Okafor C.N., Z., Zhou, L.E., Burrell, N.E., Kelso, N.E., Whitehead, J.S., Harman, et al.  
Marijuana use and viral suppression in persons receiving medical care for HIV-infection.  
Am J Drug Alcohol Abuse. 2017;43(1):103-10.
- Bertisch B., S., Franceschi, M., Lise, P., Vernazza, O., Keiser, F., Schöni-Affolter, et al.  
Risk factors for anal cancer in persons infected with HIV: a nested case-control study in the Swiss HIV Cohort Study.  
Am J Epidemiol. 2013;178(6):877-84.
- Iyer J.R., A., Van Rie, S.A., Haberlen, M., Mudavanhu, L., Mutunga, J., Bassett, et al.  
Subfertility among HIV-affected couples in a safer conception cohort in South Africa.  
Am J Obstet Gynecol. 2019;221(1):48.e1-.e18.
- Haeri S., M., Shauer, M., Dale, J., Leslie, A.M., Baker, S., Saddlemire, et al.  
Obstetric and newborn infant outcomes in human immunodeficiency virus-infected women who receive highly active antiretroviral therapy.  
Am J Obstet Gynecol. 2009;201(3):315.e1-.e5.

- Iqbal S.N., J., Kriebs, C., Harman, L., Alger, J., Kopelman, O., Turan, et al.  
Predictors of fetal growth in maternal HIV disease.  
*Am J Perinatol.* 2010;27(7):517-23.
- Mercié P., R., Thiébaud, V., Lavignolle, J.-L., Pellegrin, M.-C., Yvorra-Vives, P., Morlat, et al.  
Evaluation of cardiovascular risk factors in HIV-1 infected patients using carotid intima-media thickness measurement.  
*Ann Med.* 2002;34(1):55-63.
- Morillo-Verdugo R., M.D.L.A., Robustillo-Cortés, M.T., Martín-Conde, G., Callejón-Callejón, P., Cid-Silva, C., Moriel-Sánchez, et al.  
Effect of a Structured Pharmaceutical Care Intervention Versus Usual Care on Cardiovascular Risk in HIV Patients on Antiretroviral Therapy: INFAMERICA Study.  
*Ann Pharmacother.* 2018;52(11):1098-108.
- Bijker R., N., Kumarasamy, S., Kiertiburanakul, S., Pujari, W., Lam, R., Chaiwarith, et al.  
Cardiovascular disease incidence projections in the TREAT Asia HIV Observational Database (TAHOD).  
*Antivir Ther (Lond).* 2019.
- Protopopescu C., F., Raffi, C., Brunet-François, D., Salmon, R., Verdon, P., Reboud, et al.  
Incidence, medical and socio-behavioural predictors of psychiatric events in an 11-year follow-up of HIV-infected patients on antiretroviral therapy.  
*Antiviral Ther.* 2012;17(6):1079-83.
- Zannou D.M., L., Denoed, K., Lacombe, D., Amoussou-Guenou, J., Bashi, J., Akakpo, et al.  
Incidence of lipodystrophy and metabolic disorders in patients starting non-nucleoside reverse transcriptase inhibitors in Benin.  
*Antiviral Ther.* 2009;14(3):371-80.
- Buchacz K., R.K., Baker, F.J., Palella Jr., L., Shaw, P., Patel, K.A., Lichtenstein, et al.  
Disparities in prevalence of key chronic diseases by gender and race/ethnicity among antiretroviral-treated HIV-infected adults in the US.  
*Antiviral Ther.* 2013;18(1):65-75.
- Dubé M.P., J.W., Wu, J.A., Aberg, M.A., Deeg, B.L., Alston-Smith, M.E., McGovern, et al.  
Safety and efficacy of extended-release niacin for the treatment of dyslipidaemia in patients with HIV infection: AIDS Clinical Trials Group Study A5148.  
*Antiviral Ther.* 2006;11(8):1081-9.
- Boger M.S., A., Bian, A., Shintani, G.L., Milne, J.D., Morrow, H., Erdem, et al.  
Sex differences in urinary biomarkers of vascular and endothelial function in HIV-infected persons receiving antiretroviral therapy.  
*Antiviral Ther.* 2012;17(3):485-93.
- Park M.S., C.O., Hileman, A., Sattar, R., Gilkeson, G.A., McComsey.  
Incidental findings on chest computed tomography are common and linked to inflammation in HIV-infected adults.  
*Antiviral Ther.* 2017;22(2):127-33.
- Llop M., W.A., Sifuentes, S., Bañón, C., Macia-Villa, M.J., Perez-Elías, M., Rosillo, et al.  
Increased prevalence of asymptomatic vertebral fractures in HIV-infected patients over 50 years of age.  
*Arch Osteoporosis.* 2018;13(1).
- Monteiro V.S., H.R., Lacerda, M., Uellendahl, T.M., Chang, V.M., de Albuquerque, J.C., Zirpoli, et al.  
Calcium score in the evaluation of atherosclerosis in patients with HIV/Aids.  
*Arq Bras Cardiol.* 2011;97(5):427-33.
- Arbune M., I.-M., Dumitru, M., Cretu-Stuparu.  
Characteristics of sleep disorders in Romanian adults infected with human immunodeficiency virus.  
*ARS Medica Tomitana.* 2017;23(3):126-31.

- Batista J.L., M.F.P.M., de Albuquerque, M.L., Santos, D.B., Miranda-Filho, H.R., Lacerda, M., Maruza, et al. Association between smoking, crack cocaine abuse and the discontinuation of combination antiretroviral therapy in Recife, Pernambuco, Brazil. *Associação entre tabagismo e o uso de crack com a descontinuidade da terapia antirretroviral combinada em Recife, Pernambuco, Brasil.* 2014;56(2):127-32.
- Lima E.M.O., D.M., Gualandro, P.C., Yu, I.d.C.B., Giuliano, A.C., Marques, D., Calderaro, et al. Cardiovascular prevention in HIV patients: Results from a successful intervention program. *Atherosclerosis.* 2009;204(1):229-32.
- Acevedo M., D.L., Sprecher, L., Calabrese, G.L., Pearce, D.L., Coyner, S.S., Halliburton, et al. Pilot study of coronary atherosclerotic risk and plaque burden in HIV patients: 'A call for cardiovascular prevention'. *Atherosclerosis.* 2002;163(2):349-54.
- Parikh N.I., M., Gerschenson, K., Bennett, L.M.M., Gangcuangco, M.S., Lopez, N.N., Mehta, et al. Lipoprotein concentration, particle number, size and cholesterol efflux capacity are associated with mitochondrial oxidative stress and function in an HIV positive cohort. *Atherosclerosis.* 2015;239(1):50-4.
- Pinzone M.R., M., Ceccarelli, E.V., Rullo, M., Maresca, R., Bruno, F., Condorelli, et al. Circulating angiopoietin-like protein 2 levels are associated with decreased renal function in HIV+ subjects on cART: A potential marker of kidney disease. *Biomed Rep.* 2019;10(2):140-4.
- Misra R., P., Chandra, S.E., Riechman, D.M., Long, S., Shinde, H.J., Pownall, et al. Relationship of ethnicity and CD4 Count with glucose metabolism among HIV patients on Highly-Active Antiretroviral Therapy (HAART). *BMC Endocr Disord.* 2013;13.
- PrayGod G., J., Changelucha, S., Kapiga, R., Peck, J., Todd, S., Filteau. Dysglycemia associations with adipose tissue among HIV-infected patients after 2 years of antiretroviral therapy in Mwanza: A follow-up cross-sectional study. *BMC Infect Dis.* 2017;17(1).
- Siemieniuk R.A.C., D.B., Gregson, M.J., Gill. The persisting burden of invasive pneumococcal disease in HIV patients: An observational cohort study. *BMC Infect Dis.* 2011;11.
- George S., N., McGrath, T., Oni. The association between a detectable HIV viral load and non-communicable diseases comorbidity in HIV positive adults on antiretroviral therapy in Western Cape, South Africa. *BMC Infect Dis.* 2019;19(1).
- Ansemant T., S., Mahy, C., Piroth, P., Ornetti, S., Ewing, J.-C., Guiland, et al. Severe hypovitaminosis D correlates with increased inflammatory markers in HIV infected patients. *BMC Infect Dis.* 2013;13(1).
- Bekolo C.E., M.B., Nguena, L., Ewane, P.S., Bekoule, B., Kollo. The lipid profile of HIV-infected patients receiving antiretroviral therapy in a rural Cameroonian population. *BMC Public Health.* 2014;14:236.
- Bailey H., C., Thorne, R., Malyuta, C.L., Townsend, I., Semenenko, M., Cortina-Borja. Adherence to antiretroviral therapy during pregnancy and the first year postpartum among HIV-positive women in Ukraine. *BMC Public Health.* 2014;14:993.
- Carrieri M.P., C., Protopopescu, V., Le Moing, P., Reboud, F., Raffi, S., Mahy, et al. Impact of immunodepression and moderate alcohol consumption on coronary and other arterial disease events in

an 11-year cohort of HIV-infected patients on antiretroviral therapy.  
BMJ Open. 2012;2(6).

Alemu Y.M., W., Awoke, A., Wilder-Smith.  
Determinants for tuberculosis in HIV-infected adults in Northwest Ethiopia:multicentre case-control Study.  
BMJ Open. 2016;6(4).

Cahn P., O., Leite, A., Rosales, R., Cabello, C.A., Alvarez, C., Seas, et al.  
Metabolic profile and cardiovascular risk factors among Latin American HIV-infected patients receiving HAART.  
Braz J Infect Dis. 2010;14(2):158-66.

De Fátima Bonolo P., C.J., Machado, C.C., César, M., Das Graças Braga Ceccato, M.D.C., Guimarães.  
Vulnerability and non-adherence to antiretroviral therapy among HIV patients, Minas Gerais State, Brazil.  
Cad Saude Publica. 2008;24(11):2603-13.

Bolland M.J., A.M., Horne, S.E., Briggs, M.G., Thomas, I.R., Reid, G.D., Gamble, et al.  
Long-Term Stable Bone Mineral Density in HIV-Infected Men Without Risk Factors for Osteoporosis Treated with Antiretroviral Therapy.  
Calcif Tissue Int. 2019;105(4):423-9.

Bonnet F., C., Lewden, T., May, L., Heripret, E., Jouglu, S., Bevilacqua, et al.  
Malignancy-related causes of death in human immunodeficiency virus-infected patients in the era of highly active antiretroviral therapy.  
Cancer. 2004;101(2):317-24.

Costiniuk C.T., Z., Saneei, S., Salahuddin, J., Cox, J.-P., Routy, S., Rueda, et al.  
Cannabis Consumption in People Living with HIV: Reasons for Use, Secondary Effects, and Opportunities for Health Education.  
Cannabis and Cannabinoid Res. 2019;4(3):204-13.

Rezaei-Soufi L., P., Davoodi, H.R., Abdolsamadi, M., Jazaeri, H., Malekzadeh.  
Dental caries prevalence in Human Immunodeficiency Virus infected patients receiving highly active anti-retroviral therapy in Kermanshah, Iran.  
Cell J. 2014;16(1):73-8.

Kesselring A., L., Gras, C., Smit, G., Van Twillert, A., Verbon, F., De Wolf, et al.  
Immunodeficiency as a risk factor for non-AIDS-defining malignancies in HIV-1-infected patients receiving combination antiretroviral therapy.  
Clin Infect Dis. 2011;52(12):1458-65.

Kerchberger A.M., A.N., Sheth, C.D., Angert, C.C., Mehta, N.A., Summers, I., Ofotokun, et al.  
Weight Gain Associated with Integrase Stand Transfer Inhibitor Use in Women.  
Clin Infect Dis. 2019.

Lorenz D.R., A., Dutta, S.S., Mukerji, A., Holman, H., Uno, D., Gabuzda.  
Marijuana Use Impacts Midlife Cardiovascular Events in HIV-Infected Men.  
Clin Infect Dis. 2017;65(4):626-35.

Cole J.H., M.W.A., Caan, J., Underwood, D., De Francesco, R.A., Van Zoest, F.W.N.M., Wit, et al.  
No Evidence for Accelerated Aging-Related Brain Pathology in Treated Human Immunodeficiency Virus: Longitudinal Neuroimaging Results from the Comorbidity in Relation to AIDS (COBRA) Project.  
Clin Infect Dis. 2018;66(12):1899-909.

Smit M., R.A., van Zoest, B.E., Nichols, I., Vaartjes, C., Smit, M., van der Valk, et al.  
Cardiovascular disease prevention policy in human immunodeficiency virus: Recommendations from a modeling study.  
Clin Infect Dis. 2018;66(5):743-50.

Johns N.A., K., Wu, K., Tassiopoulos, S.L., Koletar, R.C., Kalayjian, R.J., Ellis, et al.  
Disability among Middle-Aged and Older Persons with Human Immunodeficiency Virus Infection.



Clin Infect Dis. 2017;65(1):83-91.

van Zoest R.A., F.W., Wit, K.W., Kooij, M., van der Valk, J., Schouten, N.A., Kootstra, et al.  
Higher Prevalence of Hypertension in HIV-1-Infected Patients on Combination Antiretroviral Therapy Is Associated With Changes in Body Composition and Prior Stavudine Exposure.  
Clin Infect Dis. 2016;63(2):205-13.

Bonolo P.F., M.G.B., Ceccato, G.M., Rocha, F.A., Acúrcio, L.N., Campos, M.D., Crosland Guimarães.  
Gender differences in non-adherence among Brazilian patients initiating antiretroviral therapy.  
Clinics. 2013;68(5):612-20.

Vernon L.T., C.A., Demko, C.C., Whalen, M.M., Lederman, Z., Toossi, M., Wu, et al.  
Characterizing traditionally defined periodontal disease in HIV+ adults.  
Community Dent Oral Epidemiol. 2009;37(5):427-37.

Begovac J., G., Dragović, K., Višković, J., Kušić, M.P., Mihanović, D., Lukas, et al.  
Comparison of four international cardiovascular disease prediction models and the prevalence of eligibility for lipid lowering therapy in HIV infected patients on antiretroviral therapy.  
Croat Med J. 2015;56(1):14-23.

Sutton S.S., J., Magagnoli, T.H., Cummings, J.W., Hardin, B., Edun, A., Beaubrun.  
Chronic kidney disease, cardiovascular disease, and osteoporotic fractures in patients with and without HIV in the US Veteran's Affairs Administration System.  
Curr Med Res Opin. 2019;35(1):117-25.

Bednasz C., A.E., Luque, B.S., Zingman, M.A., Fischl, B.M., Gripshover, C.S., Venuto, et al.  
Lipid-lowering therapy in HIV-infected patients: Relationship with antiretroviral agents and impact of substance-related disorders.  
Curr Vasc Pharmacol. 2016;14(3):280-7.

Worm S.W., C.A., Sabin, P., Reiss, W., El-Sadr, A.D., Monforte, C., Pradier, et al.  
Presence of the metabolic syndrome is not a better predictor of cardiovascular disease than the sum of its components in HIV-infected individuals.  
Diabetes Care. 2009;32(3):474-80.

Kobayashi T., K., Sigel, T., Kalir, I.J., MacLeod, Y., Liu, M., Gaisa.  
Anal cancer precursor lesions in HIV-infected persons: Tissue human papillomavirus type distribution and impact on treatment response.  
Dis Colon Rectum. 2019;62(5):579-85.

Socías M.E., E., Wood, W., Small, H., Dong, J., Shoveller, T., Kerr, et al.  
Methadone maintenance therapy and viral suppression among HIV-infected opioid users: The impacts of crack and injection cocaine use.  
Drug Alcohol Depend. 2016;168:211-8.

Marcellin F., C., Lions, E., Rosenthal, P., Roux, P., Sogni, L., Wittkop, et al.  
No significant effect of cannabis use on the count and percentage of circulating CD4 T-cells in HIV-HCV co-infected patients (ANRS CO13-HEPAVIH French cohort).  
Drug Alcohol Rev. 2017;36(2):227-38.

North C.M., L., Valeri, P.W., Hunt, A.R., Mocello, J.N., Martin, Y., Boum, et al.  
Cooking fuel and respiratory symptoms among people living with HIV in rural Uganda.  
ERJ Open Res. 2017;3(2).

Friis-Møller N., R., Thiébaud, P., Reiss, R., Weber, A.D., Monforte, S., De Wit, et al.  
Predicting the risk of cardiovascular disease in HIV-infected patients: The Data collection on Adverse Effects of Anti-HIV Drugs Study.  
Eur J Cardiovasc Prev Rehabil. 2010;17(5):491-501.

León R., S., Reus, N., López, I., Portilla, J., Sánchez-Payá, L., Giner, et al.

Subclinical atherosclerosis in low Framingham risk HIV patients.  
Eur J Clin Invest. 2017;47(8):591-9.

Bergersen B.M., L., Sandvik, J.N., Bruun, S., Tonstad.  
Elevated Framingham risk in HIV-positive on highly active antiretroviral therapy: Results from a Norwegian study of 721 subjects.  
Eur J Clin Microbiol Infect Dis. 2004;23(8):625-30.

Berg T., D., Zdunek, J., Stalke, S., Dupke, A., Baumgarten, A., Carganico, et al.  
N-terminal pro-B-type natriuretic peptide (NT-proBNP) in HIV-1 infected individuals on HAART.  
Eur J Med Res. 2007;12(4):152-60.

Neumann T., T., Woiwod, A., Neumann, B., Ross, C., Von Birgelen, L., Volbracht, et al.  
Cardiovascular risk factors and probability for cardiovascular events in HIV-infected patients. Part II: gender differences.  
Eur J Med Res. 2004;9(2):55-60.

Fricke U., W., Geurtsen, I., Staufenbiel, A., Rahman.  
Periodontal status of HIV-infected patients undergoing antiretroviral therapy compared to HIV-therapy naive patients: a case control study.  
Eur J Med Res. 2012;17:2.

Galán R.J., I.M.M., Escalante, R.M., Verdugo.  
Influence of pharmacotherapy complexity on compliance with the therapeutic objectives for HIV+ patients on antiretroviral treatment concomitant with therapy for dyslipidemia. INCOFAR Project.  
Farm Hosp. 2016;40(2):90-101.

Brites-Alves C., E., Luz, E.M., Netto, T., Ferreira, R.S., Diaz, C., Pedroso, et al.  
Immune activation, proinflammatory cytokines, and conventional risks for cardiovascular disease in HIV patients: A case-control study in Bahia, Brazil.  
Front Immunol. 2018;9.

Zachry III W.M., J.M., Griffith, C.M., Wegzyn, R., D'Amico, W.C., Woodward, Q.X., Qian.  
Cardiovascular risk among HIV-positive subjects preceding exposure to HAART: A retrospective claims analysis.  
Future Virol. 2013;8(9):849-60.

Chițu-Tișu C.-E., E.-C., Barbu, M., Lazăr, D.A., Ion, I.A., Bădărău.  
Low bone mineral density and associated risk factors in HIV-infected patients.  
GERMS. 2016;6(2):50-9.

Daglan E., D., Yamin, B., Manu, A., Streinu-Cercel.  
Cardiac involvement in HIV-positive patients.  
GERMS. 2013;3(1):8-13.

Nkuize M., S., De Wit, V., Muls, R., Ntounda, M., Gomez-Galdon, M., Buset.  
Comparison of Demographic Characteristics and Upper Gastrointestinal Endoscopy Findings in HIV-Positive, Antiretroviral-Treated Patients With and Without Helicobacter pylori Coinfection.  
Helicobacter. 2012;17(2):153-9.

Jackiewicz A., M., Czarnecki, A., Przeliorz-Pyszczyk, B., Knysz.  
Effect of fatty acid content in the diet on lipid profile in HIV-infected patients treated with antiretroviral drugs.  
HIV AIDS Rev. 2019;18(1):25-32.

Dentone C., A., Di Biagio, A., Cozzi Lepri, D., Fenoglio, G., Filaci, M., Lichtner, et al.  
Inflammatory effects of atazanavir/ritonavir versus darunavir/ritonavir in treatment naïve, HIV-1-infected patients.  
HIV Clin Trials. 2018;19(4):158-62.

Quirico M., R., Valeria, M., Lorenza, P., Umberto, M., Laura, P.M., Cristina, et al.  
Bone mass preservation with high-dose cholecalciferol and dietary calcium in HIV patients following antiretroviral therapy. Is it possible?

HIV Clin Trials. 2018.

Önen N., E., Overton, W., Seyfried, E., Stumm, M., Snell, K., Mondy, et al.  
Aging and HIV infection: A comparison between older HIV-infected persons and the general population.  
HIV Clin Trials. 2010;11(2):100-9.

Carr A., B., Grund, J., Neuhaus, A., Schwartz, J., Bernardino, D., White, et al.  
Prevalence of and risk factors for low bone mineral density in untreated HIV infection: A substudy of the INSIGHT Strategic Timing of AntiRetroviral Treatment (START) trial.  
HIV Med. 2015;16:137-46.

Lifson A., G., Grandits, E., Gardner, M., Wolff, P., Pulik, I., Williams, et al.  
Quality of life assessment among HIV-positive persons entering the INSIGHT Strategic Timing of AntiRetroviral Treatment (START) trial.  
HIV Med. 2015;16:88-96.

Niewoehner D., G., Collins, D., Nixon, E., Tedaldi, C., Akolo, C., Kityo, et al.  
Pulmonary function in an international sample of HIV-positive, treatment-naïve adults with CD4 counts >500 cells/ $\mu$ L: A substudy of the INSIGHT Strategic Timing of AntiRetroviral Treatment (START) trial.  
HIV Med. 2015;16:119-28.

Soliman E., S., Sharma, K., Arastéh, D., Wohl, A., Achhra, G., Tambussi, et al.  
Baseline cardiovascular risk in the INSIGHT Strategic Timing of AntiRetroviral Treatment (START) trial.  
HIV Med. 2015;16:46-54.

Pool E.R.M., A., Winston, E., Bagkeris, J.H., Vera, P.W.G., Mallon, M., Sachikonye, et al.  
High-risk behaviours, and their associations with mental health, adherence to antiretroviral therapy and HIV parameters, in HIV-positive men who have sex with men.  
HIV Med. 2019;20(2):131-6.

Besutti G., P., Raggi, S., Zona, R., Scaglioni, A., Santoro, G., Orlando, et al.  
Independent association of subclinical coronary artery disease and emphysema in HIV-infected patients.  
HIV Med. 2016;17(3):178-87.

Sampérez G., D., Guerrero, M., López, J., Valera, A., Iglesias, A., Ríos, et al.  
Prevalence of and risk factors for pulmonary abnormalities in HIV-infected patients treated with antiretroviral therapy.  
HIV Med. 2014;15(6):321-9.

Krentz H.B., G., Kliwer, M.J., Gill.  
Changing mortality rates and causes of death for HIV-infected individuals living in Southern Alberta, Canada from 1984 to 2003.  
HIV Med. 2005;6(2):99-106.

Brown J., J.A., McGowan, H., Chouial, S., Capocci, C., Smith, D., Ivens, et al.  
Respiratory health status is impaired in UK HIV-positive adults with virologically suppressed HIV infection.  
HIV Med. 2017;18(8):604-12.

Mccombe J., P., Vivithanaporn, M., Gill, C., Power.  
Predictors of symptomatic HIV-associated neurocognitive disorders in universal health care.  
HIV Med. 2013;14(2):99-107.

Petoumenos K., S., Worm, P., Reiss, S., de Wit, A., d'Arminio Monforte, C., Sabin, et al.  
Rates of cardiovascular disease following smoking cessation in patients with HIV infection: Results from the D:A:D study.  
HIV Med. 2011;12(7):412-21.

Rasmussen L.H., A., Knudsen, T.L., Katzenstein, J., Gerstoft, N., Obel, N.R., Jørgensen, et al.  
Soluble urokinase plasminogen activator receptor (suPAR) is a novel, independent predictive marker of myocardial infarction in HIV-1-infected patients: A nested case-control study.

HIV Med. 2016;17(5):350-7.

Fabbiani M., N., Ciccarelli, M., Tana, S., Farina, E., Baldonero, V., Di Cristo, et al.  
Cardiovascular risk factors and carotid intima-media thickness are associated with lower cognitive performance in HIV-infected patients.  
HIV Med. 2013;14(3):136-44.

Palacios Muñoz R., J., Santos, A., García, E., Castells, M., González, J., Ruiz, et al.  
Impact of highly active antiretroviral therapy on blood pressure in HIV-infected patients. A prospective study in a cohort of naive patients.  
HIV Med. 2006;7(1):10-5.

Thudium R.F., J., Lundgren, T., Benfield, B.G., Nordestgaard, Á.H., Borges, J., Gerstoft, et al.  
HIV infection is independently associated with a higher concentration of alpha-1 antitrypsin.  
HIV Med. 2018;19(10):745-50.

Serrano-Villar S., S., Moreno, M., Fuentes-Ferrer, C., Sánchez-Marcos, M., Ávila, T., Sainz, et al.  
The CD4: CD8 ratio is associated with markers of age-associated disease in virally suppressed HIV-infected patients with immunological recovery.  
HIV Med. 2014;15(1):40-9.

Do T.C., D., Boettiger, M., Law, S., Pujari, F., Zhang, R., Chaiwarith, et al.  
Smoking and projected cardiovascular risk in an HIV-positive Asian regional cohort.  
HIV Med. 2016;17(7):542-9.

Glass T.R., C., Ungsedhapand, M., Wolbers, R., Weber, P.L., Vernazza, M., Rickenbach, et al.  
Prevalence of risk factors for cardiovascular disease in HIV-infected patients over time: The Swiss HIV Cohort Study.  
HIV Med. 2006;7(6):404-10.

Iloeje U.H., Y., Yuan, G., L'Italien, J., Mauskopf, S.D., Holmberg, A.C., Moorman, et al.  
Protease inhibitor exposure and increased risk of cardiovascular disease in HIV-infected patients.  
HIV Med. 2005;6(1):37-44.

Yuan Y., G., L'Italien, J., Mukherjee, U.H., Iloeje.  
Determinants of discontinuation of initial highly active antiretroviral therapy regimens in a US HIV-infected patient cohort.  
HIV Med. 2006;7(3):156-62.

Horizon A.A., R.J., Joseph, Q., Liao, S.T., Ross, G.E., Pakes.  
Characteristics of foot fractures in HIV-infected patients previously treated with tenofovir versus non-tenofovir-containing highly active antiretroviral therapy.  
HIV/AIDS - Res Palliative Care. 2011;3:53-9.

Ketut Agus Somia I., T.P., Merati, I., Made Bakta, I.B.P., Manuaba, W.P.S., Yasa, I., Dewa Made Sukrama, et al.  
High levels of serum IL-6 and serum hepcidin and low CD4 cell count were risk factors of anemia of chronic disease in HIV patients on the combination of antiretroviral therapy.  
HIV/AIDS - Res Palliative Care. 2019;11:133-9.

Ayalew M.B., D., Kumilachew, A., Belay, S., Getu, D., Teju, D., Endale, et al.  
First-line antiretroviral treatment failure and associated factors in HIV patients at the university of Gondar teaching hospital, Gondar, Northwest Ethiopia.  
HIV/AIDS - Res Palliative Care. 2016;8:141-6.

Troy S.B., A.E.B., Rossheim, J., Siik, T.D., Cunningham, J.A., Kerry.  
Association of CMV, HBV, or HCV co-infection with vaccine response in adults with well-controlled HIV infection.  
Hum Vaccines Immunother. 2016;12(5):1295-9.

Rocha-Brischiliari S.C., F., Gimenes, A.L.P., De Abreu, M.M.T., Irie, R.P., Souza, R.G., Santana, et al.

- Risk factors for cervical HPV infection and genotypes distribution in HIV-infected South Brazilian women.  
*Infect Agents Cancer*. 2014;9(1).
- Knudsen A., C.A.E., Malmberg, A., Kjær, A.-M., Lebech.  
 Low prevalence of peripheral arterial disease in a cross-sectional study of Danish HIV-infected patients.  
*Infect Dis*. 2015;47(11):776-82.
- Aaron E., A., Bonacquisti, L., Mathew, G., Alleyne, L.P., Bamford, J.F., Culhane.  
 Small-for-gestational-age births in pregnant women with HIV, due to severity of HIV disease, not antiretroviral therapy.  
*Infect Dis Obstet Gynecol*. 2012;2012.
- Nduka C.U., O.A., Uthman, P.K., Kimani, A.O., Malu, S., Stranges.  
 Impact of body fat changes in mediating the effects of antiretroviral therapy on blood pressure in HIV-infected persons in a sub-Saharan African setting.  
*Infect Dis Pover*. 2016;5(1).
- Badie S.M., M., Rasoulinejad, M.R., Salehi, H.E., Kochak, S.A.S., Alinaghi, S.A.D., Manshadi, et al.  
 Evaluation of echocardiographic abnormalities in HIV positive patients treated with antiretroviral medications.  
*Infect Disord Drug Targets*. 2017;17(1):43-51.
- Madeddu G., A.G., Fois, G.M., Calia, S., Babudieri, V., Soddu, F., Becciu, et al.  
 Chronic obstructive pulmonary disease: An emerging comorbidity in HIV-infected patients in the HAART era?  
*Infection*. 2013;41(2):347-53.
- Madeddu G., E.M., Porqueddu, F., Cambosu, F., Saba, A.G., Fois, P., Pirina, et al.  
 Bacterial community acquired pneumonia in HIV-infected inpatients in the highly active antiretroviral therapy era.  
*Infection*. 2008;36(3):231-6.
- Aboud M., A., Elgalib, L., Pomeroy, G., Panayiotakopoulos, E., Skopelitis, R., Kulasegaram, et al.  
 Cardiovascular risk evaluation and antiretroviral therapy effects in an HIV cohort: Implications for clinical management: The CREATE 1 study.  
*Int J Clin Pract*. 2010;64(9):1252-9.
- May M., J.A.C., Sterne, M., Shipley, E., Brunner, R., D'Agostino, P., Whincup, et al.  
 A coronary heart disease risk model for predicting the effect of potent antiretroviral therapy in HIV-1 infected men.  
*Int J Epidemiol*. 2007;36(6):1309-18.
- Ndonga M.M., B., Longo-Mbenza, R., Wumba, B.T., Umba, B., Buassa-bu-Tsumbu, M.M., Mambimbi, et al.  
 Nadir CD4+, religion, antiretroviral therapy, incidence of type 2 diabetes mellitus, and increasing rates of obesity among black Africans with HIV disease.  
*Int J Gen Med*. 2012;5:983-90.
- Florindo A.A., M.D.R.D.D.O., Latorre, P.C., Jaime, A.A.C., Segurado.  
 Leisure time physical activity prevents accumulation of central fat in HIV/AIDS subjects on highly active antiretroviral therapy.  
*Int J STD AIDS*. 2007;18(10):692-6.
- Short C.-E.S., S.G., Shaw, M.J., Fisher, K., Walker-Bone, Y.C., Gilleece.  
 Prevalence of and risk factors for osteoporosis and fracture among a male HIV-infected population in the UK.  
*Int J STD AIDS*. 2014;25(2):113-21.
- Veld D.H., S., Pengpid, R., Colebunders, L., Skaal, K., Peltzer.  
 High-risk alcohol use and associated socio-demographic, health and psychosocial factors in patients with HIV infection in three primary health care clinics in South Africa.  
*Int J STD AIDS*. 2017;28(7):651-9.
- Quiros-Roldan E., C., Torti, C., Tinelli, F., Moretti, B., Zanini, V., Tirelli, et al.  
 Risk factors for myocardial infarction in HIV-positive patients.

Int J STD AIDS. 2005;16(1):14-8.

Li J., H., Lai, S., Chen, S., Lai.

Impact of cocaine use on protease inhibitor-associated dyslipidemia in HIV-infected adults.

Int J STD AIDS. 2018;29(8):781-9.

Jordan M.R., Y., Obeng-Aduasare, H., Sheehan, S.Y., Hong, N., Terrin, D.V., Duong, et al.

Correlates of non-adherence to antiretroviral therapy in a cohort of HIV-positive drug users receiving antiretroviral therapy in Hanoi, Vietnam.

Int J STD AIDS. 2014;25(9):662-8.

Shin S.S., C.L., Carpenter, M.L., Ekstrand, Q., Wang, S., Grover, N.M., Zetola, et al.

Cervical cancer awareness and presence of abnormal cytology among HIV-infected women on antiretroviral therapy in rural Andhra Pradesh, India.

Int J STD AIDS. 2019;30(6):586-95.

Deshwal R., S., Arora.

High Prevalence of Vitamin D Deficiency in HIV Infected on Antiretroviral Therapy in a Cohort of Indian Patients.

J Assoc Physicians India. 2019;67(3):42-5.

Balasundaram A., S., Sarkar, A., Hamide, S., Lakshminarayanan.

Socioepidemiologic profile and treatment-seeking behaviour of HIV/AIDS patients in a tertiary-care hospital in south India.

J Health Popul Nutr. 2014;32(4):587-94.

Morojele N.K., S., Nkosi, C.T., Kekwaletswe, P.A., Shuper, S.O., Manda, B., Myers, et al.

Utility of Brief Versions of the Alcohol Use Disorders Identification Test (AUDIT) to Identify Excessive Drinking Among Patients in HIV Care in South Africa.

J Stud Alcohol Drugs. 2017;78(1):88-96.

Muiru A.N., P., Bibangambah, L., Hemphill, R., Sentongo, J.-H., Kim, V.A., Triant, et al.

Distribution and Performance of Cardiovascular Risk Scores in a Mixed Population of HIV-Infected and Community-Based HIV-Uninfected Individuals in Uganda.

J Acquir Immune Defic Syndr. 2018;78(4):458-64.

Farhadian S., E., Jalbert, Y., Deng, M.B., Goetz, L.S., Park, A.C., Justice, et al.

HIV and Age Do Not Synergistically Affect Age-Related T-Cell Markers.

J Acquir Immune Defic Syndr. 2018;77(3):337-44.

Mussini C., L., Galli, A.C., Lepri, A., De Luca, A., Antinori, R., Libertone, et al.

Incidence, timing, and determinants of bacterial pneumonia among HIV-infected patients: Data from the ICONA foundation cohort.

J Acquired Immune Defic Syndr. 2013;63(3):339-45.

Jacobson D.L., D., Spiegelman, T.K., Knox, I.B., Wilson.

Evolution and predictors of change in total bone mineral density over time in HIV-infected men and women in the nutrition for healthy living study.

J Acquired Immune Defic Syndr. 2008;49(3):298-308.

MacDonald D.M., A.C., Melzer, G., Collins, A., Avihingsanon, K., Crothers, N.E., Ingraham, et al.

Smoking and accelerated lung function decline in HIV-positive individuals: A secondary analysis of the START pulmonary substudy.

J Acquired Immune Defic Syndr. 2018;79(3):E85-E92.

Drozd D.R., M.M., Kitahata, K.N., Althoff, J., Zhang, S.J., Gange, S., Napravnik, et al.

Increased Risk of Myocardial Infarction in HIV-Infected Individuals in North America Compared with the General Population.

J Acquired Immune Defic Syndr. 2017;75(5):568-76.

Volpe G.E., A.M., Tang, J.F., Polak, A., Mangili, S.C., Skinner, C.A., Wanke.

- Progression of carotid intima-media thickness and coronary artery calcium over 6 years in an HIV-infected cohort.  
*J Acquired Immune Defic Syndr.* 2013;64(1):51-7.
- Haskelberg H., P.W.G., Mallon, J., Hoy, J., Amin, C., Moore, P., Phanuphak, et al.  
 Bone mineral density over 96 weeks in adults failing first-line therapy randomized to raltegravir/lopinavir/ritonavir compared with standard second-line therapy.  
*J Acquired Immune Defic Syndr.* 2014;67(2):161-8.
- Bucher H.C., W., Richter, T.R., Glass, L., Magenta, Q., Wang, M., Cavassini, et al.  
 Small dense lipoproteins, apolipoprotein B, and risk of coronary events in HIV-infected patients on antiretroviral therapy: The Swiss HIV Cohort Study.  
*J Acquired Immune Defic Syndr.* 2012;60(2):135-42.
- Leader J.K., K., Crothers, L., Huang, M.A., King, A., Morris, B.W., Thompson, et al.  
 Risk factors associated with quantitative evidence of lung emphysema and fibrosis in an HIV-infected cohort.  
*J Acquired Immune Defic Syndr.* 2016;71(4):420-7.
- Anastos K., M.F., Schneider, S.J., Gange, H., Minkoff, R.M., Greenblatt, J., Feldman, et al.  
 The association of race, sociodemographic, and behavioral characteristics with response to highly active antiretroviral therapy in women.  
*J Acquired Immune Defic Syndr.* 2005;39(5):537-44.
- Erlandson K.M., A.A., Allshouse, C.M., Jankowski, S., Duong, S., Mawhinney, W.M., Kohrt, et al.  
 Risk factors for falls in HIV-infected persons.  
*J Acquired Immune Defic Syndr.* 2012;61(4):484-9.
- Cockerham L., R., Scherzer, A., Zolopa, D., Rimland, C.E., Lewis, P., Bacchetti, et al.  
 Association of HIV infection, demographic and cardiovascular risk factors with all-cause mortality in the recent haart Era.  
*J Acquired Immune Defic Syndr.* 2010;53(1):102-6.
- Reid M.J.A., S.M., Baxi, L.A., Sheira, A.L., Landay, E.A., Frongillo, A., Adedimeji, et al.  
 Higher Body Mass Index Is Associated with Greater Proportions of Effector CD8+ T Cells Expressing CD57 in Women Living with HIV.  
*J Acquired Immune Defic Syndr.* 2017;75(5):e132-e41.
- Echeverría P., A., Bonjoch, J., Moltó, A., Jou, J., Puig, A., Ornelas, et al.  
 Pulse wave velocity as index of arterial stiffness in hiv-infected patients compared with a healthy population.  
*J Acquired Immune Defic Syndr.* 2014;65(1):50-6.
- Allavena C., C., Delpierre, L., Cuzin, D., Rey, N., Viget, J., Bernard, et al.  
 High frequency of vitamin D deficiency in HIV-infected patients: Effects of HIV-related factors and antiretroviral drugs.  
*J Antimicrob Chemother.* 2012;67(9):2222-30.
- Yanagisawa N., M., Ando, K., Tsuchiya, K., Nitta.  
 HIV-infected men with an elevated level of serum cystatin C have a high likelihood of developing cancers.  
*J Antivirals Antiretrovirals.* 2012;4(2):0038-42.
- Salyer J., D.E., Lyon, J., Settle, R.K., Elswick, D., Rackley.  
 Coronary heart disease risks and lifestyle behaviors in persons with HIV infection.  
*J Assoc Nurses AIDS Care.* 2006;17(3):3-17.
- Mandas A., E.L., Iorio, M.G., Congiu, C., Balestrieri, A., Mereu, D., Cau, et al.  
 Oxidative imbalance in HIV-1 infected patients treated with antiretroviral therapy.  
*J Biomed Biotechnol.* 2009;2009.
- Sarfo F.S., M., Nichols, A., Singh, Y., Hardy, B., Norman, G., Mensah, et al.  
 Characteristics of hypertension among people living with HIV in Ghana: Impact of new hypertension guideline.  
*J Clin Hypertens.* 2019;21(6):838-50.

- Freitas P., D., Carvalho, A.C., Santos, A.J., Madureira, S., Xerinda, E., Martinez, et al.  
Central/peripheral fat mass ratio is associated with increased risk of hypertension in hiv-infected patients.  
*J Clin Hypertens.* 2012;14(9):593-600.
- Payam A., B., Shiramizu, C., Shikuma, C., Milne, K., Terada, E., Kajioka, et al.  
Hiv-associated anal dysplasia: Experience from a multiethnic-HIV clinic in Hawaii.  
*J Health Care Poor Underserved.* 2011;22(4):16-22.
- Pastori D., A., Esposito, R., Carnevale, S., Bartimoccia, M., Novo, A., Fantauzzi, et al.  
HIV-1 induces invivo platelet activation by enhancing platelet NOX2 activity.  
*J Infect.* 2015;70(6):651-8.
- Guzmán-Fulgencio M., J., Medrano, N., Rallón, A., Echeverria-Urabayen, J., Miguel Benito, C., Restrepo, et al.  
Soluble markers of inflammation are associated with Framingham scores in HIV-infected patients on suppressive antiretroviral therapy.  
*J Infect.* 2011;63(5):382-90.
- Nakamura H., M., Tateyama, D., Tasato, S., Haranaga, T., Ishimine, F., Higa, et al.  
The prevalence of airway obstruction among Japanese HIV-positive male patients compared with general population; A case-control study of single center analysis.  
*J Infect Chemother.* 2014;20(6):361-4.
- Ronit A., S., Sharma, J.V., Baker, R., Mngqibisa, T., Delory, L., Caldeira, et al.  
Serum Albumin as a Prognostic Marker for Serious Non-AIDS Endpoints in the Strategic Timing of Antiretroviral Treatment (START) Study.  
*J Infect Dis.* 2018;217(3):405-12.
- Parrinello C.M., E., Sinclair, A.L., Landay, N., Lurain, A.R., Sharrett, S.J., Gange, et al.  
Cytomegalovirus immunoglobulin G antibody is associated with subclinical carotid artery disease among HIV-infected women.  
*J Infect Dis.* 2012;205(12):1788-96.
- Siedner M.J., J.-H., Kim, R.S., Nakku, P., Bibangambah, L., Hemphill, V.A., Triant, et al.  
Persistent immune activation and carotid atherosclerosis in HIV-infected ugandans receiving antiretroviral therapy.  
*J Infect Dis.* 2016;213(3):370-8.
- Haberer J.E., B.M., Bwana, C., Orrell, S., Asiimwe, G., Amanyire, N., Musinguzi, et al.  
ART adherence and viral suppression are high among most non-pregnant individuals with early-stage, asymptomatic HIV infection: an observational study from Uganda and South Africa.  
*J Int AIDS Soc.* 2019;22(2).
- Nouaman M.N., M., Vinikoor, M., Seydi, D.K., Ekouevi, P.A., Coffie, L., Mulenga, et al.  
High prevalence of binge drinking among people living with HIV in four African countries.  
*J Int AIDS Soc.* 2018;21(12).
- Helou E., S., Sheno, T., Kyriakides, M.-L., Landry, M., Kozal, L.A., Barakat.  
Characterizing Patients with Very-Low-Level HIV Viremia: A Community-Based Study.  
*J Int Assoc Providers AIDS Care.* 2017;16(3):261-6.
- Poudel K.C., P.H., Palmer, M., Jimba, T., Mizoue, J., Kobayashi, K., Poudel-Tandukar.  
Coinfection with hepatitis C virus among HIV-positive people in the Kathmandu Valley, Nepal.  
*J Int Assoc Providers AIDS Care.* 2014;13(3):277-83.
- Aderemi-Williams R.I., F., Tayo, A., Sagoe, M.P., Zachariah.  
Effect of 2 Models of Care and Factors Predicting Patients' Adherence to Doctor's Appointment Attendance in Lagos State University Teaching Hospital, Ikeja, Lagos, Nigeria.  
*J Int Assoc Providers AIDS Care.* 2017;16(3):296-302.



- Wu P.-Y., M.-Y., Chen, W.-H., Sheng, S.-M., Hsieh, Y.-C., Chuang, A., Cheng, et al.  
Estimated risk of cardiovascular disease among the HIV-positive patients aged 40 years or older in Taiwan.  
*J Microbiol Immunol Infect.* 2019;52(4):549-55.
- Heaps-Woodruff J.M., P.W., Wright, B.M., Ances, D., Clifford, R.H., Paul.  
The impact of human immune deficiency virus and hepatitis C coinfection on white matter microstructural integrity.  
*J Neurovirol.* 2016;22(3):389-99.
- Kaio D.J., P.H.C., Rondó, J.M.P., Souza, A.V., Firmino, L.A., Luzia, A.A., Segurado.  
Vitamin A and beta-carotene concentrations in adults with HIV/AIDS on highly active antiretroviral therapy.  
*J Nutr Sci Vitaminol.* 2013;59(6):496-502.
- Jerome C.S., M., Agonnoudé, G.E., Sopoh, A.I., Bah-Chabi, A., de Souza, M., Bachabi, et al.  
Sociodemographic, lifestyle and therapeutic predictors of 2-year survival in HIV-infected persons receiving antiretroviral therapy in Benin.  
*J Public Health Afr.* 2017;8(1):60-4.
- Guaraldi G., M., Beggi, S., Zona, K., Luzi, G., Orlando, F., Carli, et al.  
Erectile Dysfunction Is Not a Mirror of Endothelial Dysfunction in HIV-Infected Patients.  
*J Sex Med.* 2012;9(4):1114-21.
- Makinson A., J.-C., Tenon, S., Eymard-Duvernay, J.-L., Pujol, C., Allavena, L., Cuzin, et al.  
Human immunodeficiency virus infection and non-small cell lung cancer: Survival and toxicity of antineoplastic chemotherapy in a cohort study.  
*J Thorac Oncol.* 2011;6(6):1022-9.
- Muramatsu T., K., Amano, Y., Chikasawa, M., Bingo, M., Yotsumoto, M., Otaki, et al.  
Chronic kidney disease is related to femoral neck bone loss among HIV-1-infected patients: A retrospective study.  
*J Tokyo Med Univ.* 2019;77(1):11-22.
- Baranoski A.S., A., Harris, D., Michaels, R., Miciek, T., Storer, P., Sebastiani, et al.  
Relationship between poor physical function, inflammatory markers, and Comorbidities in HIV-infected women on antiretroviral therapy.  
*J Women's Health.* 2014;23(1):69-76.
- Sharma S., P., Khadga, G.P., Dhungana, U., Chitrakar.  
Medication adherence to antiretroviral therapy among patients visiting antiretroviral therapy center at Tribhuvan university teaching hospital, Kathmandu, Nepal.  
*Kathmandu Univ Med J.* 2013;11(41):50-3.
- Sabin C.A., S.W., Worm, R., Weber, P., Reiss, W., El-Sadr, F., Dabis, et al.  
Use of nucleoside reverse transcriptase inhibitors and risk of myocardial infarction in HIV-infected patients enrolled in the D:A:D study: A multi-cohort collaboration.  
*Lancet.* 2008;371(9622):1417-26.
- Ryom L., J.D., Lundgren, W., El-Sadr, P., Reiss, O., Kirk, M., Law, et al.  
Cardiovascular disease and use of contemporary protease inhibitors: the D:A:D international prospective multicohort study.  
*Lancet HIV.* 2018;5(6):e291-e300.
- North C.M., J.G., Allen, S., Okello, R., Sentongo, B., Kakuhikire, E.T., Ryan, et al.  
HIV Infection, Pulmonary Tuberculosis, and COPD in Rural Uganda: A Cross-Sectional Study.  
*Lung.* 2018;196(1):49-57.
- Hulgan T., M.S., Boger, D.H., Liao, G.A., McComsey, C.A., Wanke, A., Mangili, et al.  
Urinary eicosanoid metabolites in HIV-infected women with central obesity switching to raltegravir: An analysis from the women, integrase, and fat accumulation trial.  
*Mediators Inflamm.* 2014;2014.

- Makhubele T.G., H.C., Steel, R., Anderson, G., Van Dyk, A.J., Theron, T.M., Rossouw.  
Systemic Immune Activation Profiles of HIV-1 Subtype C-Infected Children and Their Mothers.  
*Mediators Inflamm.* 2016;2016.
- Knudsen A., T.E., Christensen, A.A., Ghotbi, P., Hasbak, A.-M., Lebech, A., Kjær, et al.  
Normal myocardial flow reserve in HIV-infected patients on stable antiretroviral therapy: A cross-sectional study using rubidium-82 PET/CT.  
*Medicine.* 2015;94(43).
- Obry-Roguet V., S., Brégeon, C.E., Cano, C., Lions, O., Zaegel-Faucher, H., Laroche, et al.  
Risk factors associated with overweight and obesity in HIV-infected people: Aging, behavioral factors but not cART in a cross-sectional study.  
*Medicine.* 2018;97(23).
- Looby S.E., C., Psaros, G., Raggio, C., Rivard, L., Smeaton, J., Shifren, et al.  
Association between HIV status and psychological symptoms in perimenopausal women.  
*Menopause.* 2018;25(6):648-56.
- Gonçalves R.M.C., R.A., Mendoza-Sassi, M.S., Graudenz.  
Changes to the prevalence of cervical squamous intraepithelial lesions and risk factors among HIV/AIDS patients attended at a specialized service in southern Brazil from 1995 to 1999 and 2006 to 2007.  
Modificações na prevalência das lesões intra-epiteliais escamosas cervicais e dos fatores de risco em pacientes HIV/AIDS atendidas em serviço especializado no sul do Brasil nos períodos 1995-1999 e 2006-2007.  
*2009;42(1):33-8.*
- Kakar S., D., Drak, T., Amin, J., Cheung, C.C., O'Connor, D.M., Gracey.  
Screening and management practices for renal disease in the HIV-positive patient population of an inner metropolitan sexual health service.  
*Nephrology.* 2017;22(2):174-8.
- Shuter J., S., Bernstein.  
Cigarette smoking is an independent predictor of nonadherence in HIV-infected individuals receiving highly active antiretroviral therapy.  
*Nicotine Tob Res.* 2008;10(4):731-6.
- Edward A.O., A.A., Oladayo, A.S., Omolola, A.A., Adetiloye, P.A., Adedayo.  
Prevalence of traditional cardiovascular risk factors and evaluation of cardiovascular risk using three risk equations in Nigerians living with human immunodeficiency virus.  
*North Am J Med Sci.* 2013;5(12):680-8.
- Krishnan S., J.T., Schouten, D.L., Jacobson, C.A., Benson, A.C., Collier, S.L., Koletar, et al.  
Incidence of Non-AIDS-defining cancer in antiretroviral treatment-naïve subjects after antiretroviral treatment initiation: An ACTG longitudinal linked randomized trials analysis.  
*Oncology (Switzerland).* 2011;80(1):42-9.
- Melaku T., G., Mamo, L., Chelkeba, T., Chanie.  
Immunologic restoration of people living with human immunodeficiency virus on highly active anti-retroviral therapy in Ethiopia: The focus of chronic non-communicable disease co-morbidities.  
*Open AIDS J.* 2019;13(1):36-48.
- Lake J.E., R.M., Hoffman, C.-H., Tseng, H.M., Wilhalme, J.S., Adams, J.S., Currier.  
Success of standard dose vitamin D supplementation in treated human immunodeficiency virus infection.  
*Open Forum Infect Dis.* 2015;2(2).
- Baker J.V., K.H., Hullsiek, N.W., Engen, R., Nelson, P., Chetchotisakd, J., Gerstoft, et al.  
Early antiretroviral therapy at high CD4 counts does not improve arterial elasticity: A substudy of the strategic timing of antiretroviral treatment (START) trial.  
*Open Forum Infect Dis.* 2016;3(4).
- Kulkarni M., E., Bowman, J., Gabriel, T., Amburgy, E., Mayne, D.A., Zidar, et al.

Altered monocyte and endothelial cell adhesion molecule expression is linked to vascular inflammation in human immunodeficiency virus infection.  
Open Forum Infect Dis. 2016;3(4).

Dirajlal-Fargo S., M., Kulkarni, E., Bowman, L., Shan, A., Sattar, N., Funderburg, et al.  
Serum albumin is associated with higher inflammation and carotid atherosclerosis in treated human immunodeficiency virus infection.  
Open Forum Infect Dis. 2018;5(11).

Alencherry B., G., Erem, G., Mirembe, I., Ssinabulya, C.-H., Yun, C.-L., Hung, et al.  
Coronary artery calcium, HIV and inflammation in Uganda compared with the USA.  
Open Heart. 2019;6(1).

Mama M., A., Manilal, H., Tesfa, H., Mohammed, E., Erbo.  
Prevalence of pulmonary tuberculosis and associated factors among HIV positive patients attending antiretroviral therapy clinic at Arba minch general hospital, southern Ethiopia.  
Open Microbiol J. 2018;12:163-71.

Nittayananta W., K., Amornthatree, M., Kemapunmanus, S., Talungchit, H., Sriplung.  
Expression of oral cytokines in HIV-infected subjects with long-term use of antiretroviral therapy.  
Oral Dis. 2014;20(3):e57-e64.

Engeland C.G., P., Jang, M., Alves, P.T., Marucha, J., Califano.  
HIV infection and tooth loss.  
Oral Surg Oral Med Oral Pathol Oral Radiol Endod. 2008;105(3):321-6.

Kazooba P., I., Kasamba, B.N., Mayanja, J., Lutaakome, I., Namakoola, T., Salome, et al.  
Cardiometabolic risk among HIV-positive Ugandan adults: Prevalence, predictors and effect of long-term antiretroviral therapy.  
Pan Afr Med J. 2017;27.

Mai H.T., G.M., Le, B.X., Tran, H.N., Do, C.A., Latkin, L.T., Nguyen, et al.  
Adherence to antiretroviral therapy among HIV/ AIDS patients in the context of early treatment initiation in Vietnam.  
Patient Preference Adherence. 2018;12:2131-7.

Da Silva É.F.R., K.C., Bassichetto, D.S., Lewi.  
Lipid profile, cardiovascular risk factors and metabolic syndrome in a group of AIDS patients.  
Perfil lipídico, fatores de risco cardiovascular e síndrome metabólica em um grupo de pacientes com AIDS.  
2009;93(2):113-8.

Nguyen S.T., S.A., Eaton, A.M., Bain, A.P., Rahman, K.D., Payne, R., Bedimo, et al.  
Lipid-lowering efficacy and safety after switching to atazanavir-ritonavir- based highly active antiretroviral therapy in patients with human immunodeficiency virus.  
Pharmacotherapy. 2008;28(3):323-30.

Amberbir A., V., Banda, V., Singano, A., Matengeni, C., Pfaff, Z., Ismail, et al.  
Effect of cardio-metabolic risk factors on all-cause mortality among HIV patients on antiretroviral therapy in Malawi: A prospective cohort study.  
PLoS ONE. 2019;14(1).

Castley A., L., Williams, I., James, G., Guelfi, C., Berry, D., Nolan.  
Plasma CXCL10, sCD163 and sCD14 levels have distinct associations with antiretroviral treatment and cardiovascular disease risk factors.  
PLoS ONE. 2016;11(6).

Cournil A., S., Eymard-Duvernay, A., Diouf, C., Moquet, J., Coutherut, N.F.N., Gueye, et al.  
Reduced quantitative ultrasound bone mineral density in HIV-infected patients on antiretroviral therapy in Senegal.  
PLoS ONE. 2012;7(2).

- Martin A., C.L., Moore, P.W., Mallon, J.F., Hoy, S., Emery, W.H., Bellosso, et al.  
HIV lipodystrophy in participants randomised to lopinavir/ritonavir (LPV/r) +2-3 nucleoside/nucleotide reverse transcriptase inhibitors (N(t)RTI) or LPV/r + raltegravir as second-line antiretroviral therapy.  
PLoS ONE. 2013;8(10).
- Petraglia A., J.K., Leader, M., Gingo, M., Fitzpatrick, J., Ries, C., Kessinger, et al.  
Emphysema is associated with thoracic vertebral bone attenuation on chest CT scan in HIV-infected individuals.  
PLoS ONE. 2017;12(4).
- Winston A., A., Arenas-Pinto, W., Stöhr, M., Fisher, C.M., Orkin, K., Aderogba, et al.  
Neurocognitive Function in HIV Infected Patients on Antiretroviral Therapy.  
PLoS ONE. 2013;8(4).
- Hatcher A.M., A.C., Tsai, E., Kumbakumba, S.L., Dworkin, P.W., Hunt, J.N., Martin, et al.  
Sexual Relationship Power and Depression among HIV-Infected Women in Rural Uganda.  
PLoS ONE. 2012;7(12).
- Ghehi C., D., Gabillard, R., Moh, A., Badje, G.M., Kouamé, E., Oouttara, et al.  
High correlation between Framingham equations with BMI and with lipids to estimate cardiovascular risks score at baseline in HIV-infected adults in the Temprano trial, ANRS 12136 in Côte d'Ivoire.  
PLoS ONE. 2017;12(6).
- Dimala C.A., J., Atashili, J.C., Mbuagbaw, A., Wilfred, G.L., Monekosso.  
A comparison of the diabetes risk score in HIV/AIDS patients on Highly Active Antiretroviral Therapy (HAART) and HAART-naïve patients at the Limbe Regional Hospital, Cameroon.  
PLoS ONE. 2016;11(5).
- Miller C.J., J.V., Baker, A.M., Bormann, K.M., Erlandson, K.H., Hullsiek, A.C., Justice, et al.  
Adjudicated morbidity and mortality outcomes by age among individuals with HIV infection on suppressive antiretroviral therapy.  
PLoS ONE. 2014;9(4).
- Guaraldi G., G., Besutti, R., Scaglioni, A., Santoro, S., Zona, L., Guido, et al.  
The Burden of image based emphysema and bronchiolitis in HIV-infected individuals on antiretroviral therapy.  
PLoS ONE. 2014;9(10).
- Bultum J.A., N., Yigzaw, W., Demeke, M., Alemayehu.  
Alcohol use disorder and associated factors among human immunodeficiency virus infected patients attending antiretroviral therapy clinic at Bishoftu General Hospital, Oromiya region, Ethiopia.  
PLoS ONE. 2018;13(3).
- Liu J.C.Y., J.M., Leung, D.A., Ngan, N.F., Nashta, S., Guillemi, M., Harris, et al.  
Absolute leukocyte telomere length in HIV-infected and uninfected individuals: Evidence of accelerated cell senescence in HIV-associated chronic obstructive pulmonary disease.  
PLoS ONE. 2015;10(4).
- Lake J.E., C.-H., Tseng, J.S., Currier.  
A Pilot Study of Telmisartan for Visceral Adiposity in HIV Infection: The Metabolic Abnormalities, Telmisartan, and HIV Infection (MATH) Trial.  
PLoS ONE. 2013;8(3).
- Baker J.V., K., Huppler Hullsiek, R., Prosser, D., Duprez, R., Grimm, R.P., Tracy, et al.  
Angiotensin Converting Enzyme Inhibitor and HMG-CoA Reductase Inhibitor as Adjunct Treatment for Persons with HIV Infection: A Feasibility Randomized Trial.  
PLoS ONE. 2012;7(10).
- Barska K., W., Kwiatkowska, B., Knysz, K., Arczyńska, M., Karczewski, W., Witkiewicz.  
The role of the tissue factor and its inhibitor in the development of subclinical atherosclerosis in people living with HIV.

PLoS ONE. 2017;12(7).

Rollet-Kurhajec K.C., E.E.M., Moodie, S., Walmsley, C., Cooper, N., Pick, M.B., Klein.  
Hepatic fibrosis progression in HIV-hepatitis C virus co-infection - The effect of sex on risk of significant fibrosis measured by aspartate-to-platelet ratio index.  
PLoS ONE. 2015;10(6).

Furuya-Kanamori L., M.D., Kelly, S.J., McKenzie.  
Co-Morbidity, Ageing and Predicted Mortality in Antiretroviral Treated Australian Men: A Quantitative Analysis.  
PLoS ONE. 2013;8(10).

Rabkin M., A., Mutiti, C., Chung, Y., Zhang, Y., Wei, W.M., El-Sadr.  
Missed opportunities to address cardiovascular disease risk factors amongst adults attending an urban HIV clinic in South Africa.  
PLoS ONE. 2015;10(10).

George M.P., M., Kannass, L., Huang, F.C., Sciruba, A., Morris.  
Respiratory symptoms and airway obstruction in HIV-infected subjects in the HAART era.  
PLoS ONE. 2009;4(7).

Gingo M.R., Y., Zhang, K.B., Ghebrehawariat, J.-H., Jeong, Y., Chu, Q., Yang, et al.  
Elevated NT-pro-brain natriuretic peptide level is independently associated with all-cause mortality in HIV-infected women in the early and recent HAART eras in the women's interagency HIV study cohort.  
PLoS ONE. 2015;10(3).

Weldehaweria N.B., E.H., Abreha, M.G., Weldu, K.H., Misgina.  
Psychosocial correlates of nutritional status among people living with HIV on antiretroviral therapy: A matched case-control study in Central zone of Tigray, Northern Ethiopia.  
PLoS ONE. 2017;12(3).

Kristoffersen U.S., A.-M., Lebech, N., Wiinberg, C.L., Petersen, P., Hasbak, H., Gutte, et al.  
Silent Ischemic Heart Disease and Pericardial Fat Volume in HIV-Infected Patients: A Case-Control Myocardial Perfusion Scintigraphy Study.  
PLoS ONE. 2013;8(8).

Szymanek-Pasternak A., A., Szymczak, M., Zalewska, K., Małyszczak, B., Knysz.  
Risk factors for chronic kidney disease do not influence the serum levels of asymmetric dimethylarginine in HIV-1-infected patients without significant renal disease.  
Pol Arch Med Wewn. 2016;126(9):672-80.

Fontela C., J., Castilla, R., Juanbeltz, I., Martínez-Baz, M., Rivero, A., O'Leary, et al.  
Comorbidities and cardiovascular risk factors in an aged cohort of HIV-infected patients on antiretroviral treatment in a Spanish hospital in 2016.  
Postgrad Med. 2018;130(3):317-24.

Turčinov D., J., Begovac.  
Predicted coronary heart disease risk in Croatian HIV infected patients treated with combination antiretroviral therapy.  
Predvidjanje rizika koronarne bolesti srca u sudionika zaraženih HIV-om iz Hrvatske liječenih cart-om.  
2011;35(1):115-21.

Knobel H., P., Domingo, I., Suarez-Lozano, F., Gutierrez, V., Estrada, R., Palacios, et al.  
Rate of cardiovascular, renal and bone disease and their major risks factors in HIV-infected individuals on antiretroviral therapy in Spain.  
Prevalencia de enfermedad cardiovascular, renal y ósea, y sus principales factores de riesgo en personas infectadas por el VIH que reciben tratamiento antirretroviral en España. 2019;37(6):373-9.

Siyahhan Julnes P., S., Auh, R., Krakora, K., Withers, D., Nora, L., Matthews, et al.  
The Association Between Post-traumatic Stress Disorder and Markers of Inflammation and Immune Activation in HIV-Infected Individuals With Controlled Viremia.

Psychosomatics. 2016;57(4):423-30.

Willig A.L., P.A., Kramer, B.K., Chacko, V.M., Darley-USmar, S.L., Heath, E.T., Overton.  
Monocyte bioenergetic function is associated with body composition in virologically suppressed HIV-infected women.  
Redox Biol. 2017;12:648-56.

Passos A.I.M., E.R., Couto, S.M., de Rezende, M.L., Moretti.  
Evaluation of functional respiratory parameters in AIDS patients assisted in the infectious diseases ambulatory care clinic of a tertiary care university hospital in Brazil.  
Respir Care. 2012;57(4):544-9.

Almeida S.E., M., Borges, M., Fiegenbaum, C.C., Nunes, M.L., Rossetti.  
Metabolic changes associated with antiretroviral therapy in HIV-positive patients.  
Rev Saude Publica. 2009;43(2):283-90.

Jaime P.C., A.A., Florindo, O., Latorre M. do R.D. de, A.A.C., Segurado.  
Central obesity and dietary intake in HIV/AIDS patients.  
Rev Saude Publica. 2006;40(4):634-40.

Sansores C.C., A.S., Rivero, A.G., Flores, R.R., Sánchez, R.A., Góngora Biachi, E.B., Caldelas, et al.  
Cardiovascular risk in HIV patients.  
Riesgo cardiovascular en pacientes con VIH. 2008;24(4):284-8.

Waweru P., R., Anderson, H., Steel, W.D.F., Venter, D., Murdoch, C., Feldman.  
The prevalence of smoking and the knowledge of smoking hazards and smoking cessation strategies among HIV-positive patients in Johannesburg, South Africa.  
S Afr Med J. 2013;103(11):858-60.

Biraguma J., E., Mutimura, J.M., Frantz.  
Health-related quality of life and associated factors in adults living with HIV in Rwanda.  
SAHARA J. 2018;15(1):110-20.

Missailidis C., J., Höijer, M., Johansson, L., Ekström, G., Bratt, B., Hejdeman, et al.  
Vitamin D status in Well-Controlled Caucasian HIV Patients in Relation to Inflammatory and Metabolic Markers - A Cross-Sectional Cohort Study in Sweden.  
Scand J Immunol. 2015;82(1):55-62.

Colón-López V., D., González-Barríos, S.M., De León, G., Girona-Lozada, M., Machin, E., Charneco, et al.  
Population-Based Study of Tobacco Use Among People Living With HIV in Puerto Rico.  
Subst Use Misuse. 2018;53(3):420-5.

Ma Q., B.S., Zingman, A.E., Luque, M.A., Fischl, B.M., Gripshover, C.S., Venuto, et al.  
Therapeutic drug monitoring of protease inhibitors and efavirenz in HIV-infected individuals with active substance-related disorders.  
Ther Drug Monit. 2011;33(3):309-14.

D'Ascenzo F., E., Cerrato, D., Appleton, C., Moretti, A., Calcagno, N., Abouzaki, et al.  
Prognostic indicators for recurrent thrombotic events in HIV-infected patients with acute coronary syndromes: Use of registry data from 12 sites in Europe, South Africa and the United States.  
Thromb Res. 2014;134(3):558-64.

Bhatta D.N., A., Subedi, N., Sharma.  
Tobacco smoking and alcohol drinking among HIV infected people using antiretroviral therapy.  
Tob Induced Dis. 2018;16.

Adefolalu A.O., Z.Z., Nkosi, S.A.S., Olorunju.  
Patterns of adherence to scheduling and dietary instructions among patients on antiretroviral therapy in Pretoria, South Africa.  
Trans R Soc Trop Med Hyg. 2014;108(9):582-8.

- Adefolalu A.O., Z.Z., Nkosi, S.A.S., Olorunju.  
Patterns of adherence to scheduling and dietary instructions among patients on antiretroviral therapy in Pretoria, South Africa.  
*Trans R Soc Trop Med Hyg.* 2014;108(9):582-8.
- Katoto P.D.M.C., F., Thienemann, A.N.H., Bulabula, T.M., Esterhuizen, A.B., Murhula, P.P.M., Lunjwire, et al.  
Prevalence and risk factors of metabolic syndrome in HIV-infected adults at three urban clinics in a post-conflict setting, eastern Democratic Republic of the Congo.  
*Trop Med Int Health.* 2018;23(7):795-805.
- Fuster F., J.I., Vargas, D., Jensen, V., Sarmiento, P., Acuña, F., Peirano, et al.  
CD4/CD8 ratio as a predictor of the response to HBV vaccination in HIV-positive patients: A prospective cohort study.  
*Vaccine.* 2016;34(16):1889-95.
- García-Lázaro M., A.R., Román, Á.C., Espejo, I., Pérez-Camacho, C.N., Kindelán, J.J.C., Osorio, et al.  
Variability in coronary risk assessment in HIV-infected patients.  
Variabilidad en la valoración del riesgo coronario en pacientes infectados por el virus de la inmunodeficiencia humana. 2007;129(14):521-4.
- Hinojosa C.A., A.E., Nunez-Salgado, J.E., Anaya-Ayala, H., Laparra-Escareno, L.J., Ortiz-Lopez, J.O., Herrera-Caceres, et al.  
Prevalence and variables associated with an abnormal ankle-brachial index among patients with human immunodeficiency virus/acquired immunodeficiency syndrome.  
*Vascular.* 2018;26(5):540-6.
- Tomažič J., K., Ul, G., Volčanšek, S., Gorenšek, M., Pfeifer, P., Karner, et al.  
Prevalence and risk factors for osteopenia/osteoporosis in an HIV-infected male population.  
*Wien Klin Wochenschr.* 2007;119(21):639-46.

*Supplementary References 2. Articles included in the meta-of the association between active smoking and adherence to antiretroviral therapy in people living with HIV*

Cigarette smoking is an independent predictor of nonadherence in HIV-infected individuals receiving highly active antiretroviral therapy

Shuter J., Bernstein S.

*Nicotine and Tobacco Research* (2008) 10:4 (731-736).

Determinants of adherence in a cohort of Belgian HIV patients: A pilot study

Degroote S., Vogelaers D., Vermeir P., Mariman A., De Rick A., Van Der Gucht B., Pelgrom J., Van Wanzele F., Verhofstede C., Vancauwenberghe J., Vandijck D.

*Acta Clinica Belgica* (2014) 69:2 (111-115).

Factors associated with non-adherence to antiretroviral therapy in adults with AIDS in the first six months of treatment in Salvador, Bahia State, Brazil

Silva J.A., Dourado I., Brito A.M., Silva C.A.

*Cadernos de saúde pública* (2015) 31:6 (1188-1198).

Rate and predictors of self-chosen drug discontinuations in highly active antiretroviral therapy-treated HIV-positive individuals

Murri R., Guaraldi G., Lupoli P., Crisafulli R., Marcotullio S., Von Schloesser F., Wu A.W.

*AIDS Patient Care and STDs* (2009) 23:1 (35-39).

Compliance of antiviral therapy and influencing factors in people living with HIV/AIDS in Nanjing

Wei H., Li M., Zhang X., Bu K., Feng Y., Liu X., Shi L., Chen Y., Bai C., Fu G., Huan X., Wang L.

*Chinese Journal of Endemiology* (2015) 36:7 (672-676).

Medication adherence in HIV-infected smokers: The mediating role of depressive symptoms

Webb M.S., Vanable P.A., Carey M.P., Blair D.C.

*AIDS Education and Prevention* (2009) 21:SUPPL. 3 (94-105).

Effects of cigarette smoking and nicotine dependence on adherence to antiretroviral therapy among HIV-positive patients in Vietnam

Nguyen N.T.P., Tran B.X., Hwang L.Y., Markham C.M., Swartz M.D., Vidrine J.I., Phan H.T.T., Latkin C.A., Vidrine D.J.

*AIDS Care - Psychological and Socio-Medical Aspects of AIDS/HIV* (2016) 28:3 (359-364).

Factors associated with optimal pharmacy refill adherence for antiretroviral medications and plasma HIV RNA non-detectability among HIV-positive crack cocaine users: A prospective cohort study

Hayashi K., Wood E., Kerr T., Dong H., Nguyen P., Puskas C.M., Guillemi S., Montaner J.S.G., Milloy M.-J.

*BMC Infectious Diseases* (2016) 16:1 Article Number: 455.

Cumulative exposure to stimulants and immune function outcomes among HIV-positive and HIV-negative men in the Multicenter AIDS Cohort Study

Shoptaw S., Stall R., Bordon J., Kao U., Cox C., Li X., Ostrow D.G., Plankey M.W.

*International Journal of STD and AIDS* (2012) 23:8 (576-580).

Medication adherence to antiretroviral therapy among patients visiting antiretroviral therapy center at Tribhuvan university teaching hospital, Kathmandu, Nepal

Sharma S., Khadga P., Dhungana G.P., Chitrakar U.

*Kathmandu University Medical Journal* (2013) 11:41 (50-53).

Drug use patterns and adherence to treatment among HIV-positive patients: evidence from a large sample of French outpatients (ANRS-EN12-VESPA 2003)

Peretti-Watel P., Spire B., Lert F., Obadia Y.

*Drug and Alcohol Dependence* (2006) 82:SUPPL. 1 (S71-S79).

The association of race, sociodemographic, and behavioral characteristics with response to highly active antiretroviral therapy in women

Anastos K., Schneider M.F., Gange S.J., Minkoff H., Greenblatt R.M., Feldman J., Levine A., Delapenha R.,



Cohen M.

*Journal of Acquired Immune Deficiency Syndromes* (2005) 39:5 (537-544).

Adherence to highly active antiretroviral therapies (HAART) in HIV-infected patients: From a predictive to a dynamic approach

Spire B., Duran S., Souville M., Leport C., Raffi F., Moatti J.-P.

*Social Science and Medicine* (2002) 54:10 (1481-1496).

The Modalities of Nonadherence to Highly Active Antiretroviral Therapy and the Associated Factors Related to Patients' Sociodemographic Characteristics and Their Caregiving Perceptions in Ouagadougou (Burkina Faso)

Guira O., Kaboré D.S.R., Dao G., Zagré N., Zohoncon T.M., Pietra V., Drabo J.Y., Simporé J.

*Journal of the International Association of Providers of AIDS Care* (2013) 15:3 (256-260).

The relationship between ART adherence and smoking status among HIV+ individuals

Moreno J.L., Catley D., Lee H.S., Goggin K.

*AIDS and behavior* (2015) 19:4 (619-625).

Predictors of Antiretroviral Adherence Self-efficacy among People Living with HIV/AIDS in a Canadian Setting

Lee W.K., Milloy M.J.S., Nosova E., Walsh J., Kerr T.

*Journal of Acquired Immune Deficiency Syndromes* (2019) 80:1 (103-109).

Patterns of adherence to scheduling and dietary instructions among patients on antiretroviral therapy in Pretoria, South Africa

Adefolalu A.O., Nkosi Z.Z., Olorunju S.A.S.

*Transactions of the Royal Society of Tropical Medicine and Hygiene* (2014) 108:9 (582-588) Article Number: tr116.

Factors associated with nonadherence to antiretroviral therapy in HIV-positive smokers

Marks King R., Vidrine D.J., Danysh H.E., Fletcher F.E., McCurdy S., Arduino R.C., Gritz E.R.

*AIDS Patient Care and STDs* (2012) 26:8 (479-485).

Adherence to anti-retroviral therapy and its associated factors among patients with HIV/AIDS in central Java Indonesia

Febriyanti E.K.A., Choliso Z., Wikantyasning E.R., Sagotra G., Anggoro I.H.M., Devientasari C., Nuraeni E.

*International Journal of Pharmaceutical Research* (2019) 11 Supplemtery 1 (1073-1080).

The association between cigarette smoking, virologic suppression, and CD4+ lymphocyte count in HIV-Infected Russian women

Brown J.L., Winhusen T., DiClemente R.J., Sales J.M., Rose E.S., Safonova P., Levina O., Belyakov N.,

Rassokhin V.V.

*AIDS Care - Psychological and Socio-Medical Aspects of AIDS/HIV* (2017) 29:9 (1102-1106).

Adherence to antiretroviral therapy among people living with HIV/AIDS in Northeastern Brazil: A cross-sectional study

Soares R.C.A., de Brito A.M., Lima K., Lapa T.M.

*Sao Paulo Medical Journal* (2019) 137:6 (479-485).

Depression and coping are associated with failure of adherence to antiretroviral therapy among people living with HIV/aids

Camargo C.C., Cavassan N.R.V., Tasca K.I., Meneguim S., Miot H.A., Souza L.R.

*AIDS Research and Human Retroviruses* (2019) 35:11-12 (1181-1188).

Evaluation of adherence to antiretroviral treatment. Analysis of related factors

Valoración de la adherencia al tratamiento antirretroviral. Análisis de factores relacionados

Real J.M., Navarro H., Lapresta C., Rabanaque M.J., Soler E., Abad M.R.

*Atencion Farmaceutica* (2011) 13:4 (215-221).

Cigarette Smoking and Antiretroviral Therapy (ART) Adherence in a Sample of Heavy Drinking HIV-Infected Men Who Have Sex with Men (MSM)

Cioe P.A., Gamarel K.E., Pantalone D.W., Monti P.M., Mayer K.H., Kahler C.W.  
*AIDS and behavior* (2017) 21:7 (1956-1963).

Association between smoking, crack cocaine abuse and the discontinuation of combination antiretroviral therapy in Recife, Pernambuco, Brazil

Associação entre tabagismo e o uso de crack com a descontinuidade da terapia antirretroviral combinada em Recife, Pernambuco, Brasil

Batista J.L., de Albuquerque M.F.P.M., Santos M.L., Miranda-Filho D.B., Lacerda H.R., Maruza M., Moura L.V., Coimbra I., Ximenes R.A.A.

*Revista do Instituto de Medicina Tropical de Sao Paulo* (2014) 56:2 (127-132).

HIV treatment adherence and unprotected sex practices in people receiving antiretroviral therapy

Kalichman S.C., Rompa D.

*Sexually Transmitted Infections* (2003) 79:1 (59-61).

Vitamin A and beta-carotene concentrations in adults with HIV/AIDS on highly active antiretroviral therapy

Kaio D.J., Rondó P.H.C., Souza J.M.P., Firmino A.V., Luzia L.A., Segurado A.A.

*Journal of Nutritional Science and Vitaminology* (2013) 59:6 (496-502).

The Impact of Substance Use on Adherence to Antiretroviral Therapy Among HIV-Infected Women in the United States

Zhang Y., Wilson T.E., Adedimeji A., Merenstein D., Milam J., Cohen J., Cohen M., Golub E.T.

*AIDS and behavior* (2018) 22:3 (896-908).

Determinants of discontinuation of initial highly active antiretroviral therapy regimens in a US HIV-infected patient cohort

Yuan Y., L'Italien G., Mukherjee J., Iloeje U.H.

*HIV Medicine* (2006) 7:3 (156-162).

Substance Use, Violence, and Antiretroviral Adherence: A Latent Class Analysis of Women Living with HIV in Canada

Carter A., Roth E.A., Ding E., Milloy M.-J., Kestler M., Jabbari S., Webster K., de Pokomandy A., Loutfy M., Kaida A.

*AIDS and behavior* (2018) 22:3 (971-985).

HIV-infected individuals who use alcohol and other drugs, and virologic suppression

Nolan S., Walley A.Y., Heeren T.C., Patts G.J., Ventura A.S., Sullivan M.M., Samet J.H., Saitz R.

*AIDS Care - Psychological and Socio-Medical Aspects of AIDS/HIV* (2017) 29:9 (1129-1136).

High-intensity cannabis use and adherence to antiretroviral therapy among people who use illicit drugs in a Canadian setting

Slawson G., Milloy M.-J., Balneaves L., Simo A., Guillemi S., Hogg R., Montaner J., Wood E., Kerr T.

*AIDS and behavior* (2015) 19:1 (120-127).

Gender differences in non-adherence among Brazilian patients initiating antiretroviral therapy

Bonolo P.F., Ceccato M.G.B., Rocha G.M., Acúrcio F.A., Campos L.N., Crosland Guimarães M.D.

*Clinics* (2013) 68:5 (612-620).

Patterns and predictors of antiretroviral therapy use among alcohol drinkers at HIV clinics in Tshwane, South Africa

Kekwaletswe C.T., Morojele N.K.

*AIDS Care - Psychological and Socio-Medical Aspects of AIDS/HIV* (2014) 26 Supplement 1 (S78-S82).

Patterns and predictors of antiretroviral therapy use among alcohol drinkers at HIV clinics in Tshwane, South Africa

Kekwaletswe C.T., Morojele N.K.

*AIDS Care - Psychological and Socio-Medical Aspects of AIDS/HIV* (2014) 26:SUPPL. 1 (78-82).

Vulnerability and non-adherence to antiretroviral therapy among HIV patients, Minas Gerais State, Brazil  
De Fátima Bonolo P., Machado C.J., César C.C., Das Graças Braga Ceccato M., Guimarães M.D.C.  
*Cadernos de Saude Publica* (2008) 24:11 (2603-2613).

Relationship between Single Tablet Antiretroviral Regimen and Adherence to Antiretroviral and Non-Antiretroviral Medications among Veterans' Affairs Patients with Human Immunodeficiency Virus  
Yager J., Faragon J., McGuey L., Hoye-Simek A., Hecox Z., Sullivan S., Neubert S., Patel N.  
*AIDS Patient Care and STDs* (2017) 31:9 (370-376).

Adherence to antiretroviral therapy, stigma and behavioral risk factors in HIV-infected adolescents in Asia  
Prasitsuebsai W., Sethaputra C., Lumbiganon P., Hansudewechakul R., Chokephaibulkit K., Truong K.H., Nguyen L.V., Mohd Razali K.A., Nik Yusoff N.K., Fong M.S., Teeraananchai S., Ananworanich J., Durier N.  
*AIDS Care - Psychological and Socio-Medical Aspects of AIDS/HIV* (2018) 30:6 (727-733).

Tobacco smoking and alcohol drinking among HIV infected people using antiretroviral therapy  
Bhatta D.N., Subedi A., Sharma N.  
*Tobacco Induced Diseases* (2018) 16:April.

Correlates of non-adherence to antiretroviral therapy in a cohort of HIV-positive drug users receiving antiretroviral therapy in Hanoi, Vietnam  
Jordan M.R., Obeng-Aduasare Y., Sheehan H., Hong S.Y., Terrin N., Duong D.V., Trung N.V., Wanke C., Kinh N.V., Tang A.M.  
*International Journal of STD and AIDS* (2014) 25:9 (662-668).

Baseline Cigarette Smoking Status as a Predictor of Virologic Suppression and CD4 Cell Count During One-Year Follow-Up in Substance Users with Uncontrolled HIV Infection  
Winhusen T., Feaster D.J., Duan R., Brown J.L., Daar E.S., Mandler R., Metsch L.R.  
*AIDS and behavior* (2018) 22:6 (2026-2032).

Substance Use Stigma and Antiretroviral Therapy Adherence among a Drug-Using Population Living with HIV  
Stringer K.L., Marotta P., Baker E., Turan B., Kempf M.-C., Drentea P., Stepanikova I., Turan J.M.  
*AIDS Patient Care and STDs* (2019) 33:6 (282-293).

Factors associated with adherence amongst 5295 people receiving antiretroviral therapy as part of an international trial  
O'Connor J.L., Gardner E.M., Mannheimer S.B., Lifson A.R., Esser S., Telzak E.E., Phillips A.N.  
*Journal of Infectious Diseases* (2013) 208:1 (40-49).

A Longitudinal Study of Behavioral Risk, Adherence, and Virologic Control in Adolescents Living with HIV in Asia  
Ross J.L., Teeraananchai S., Lumbiganon P., Hansudewechakul R., Chokephaibulkit K., Khanh T.H., Van Nguyen L., Mohamed T.A.J., Yusoff N.K.N., Fong M.S., Prasitsuebsai W., Sohn A.H., Kerr S.J.  
*Journal of Acquired Immune Deficiency Syndromes* (2019) 81:2 (e28-e38).

HIV-infected adolescents have low adherence to antiretroviral therapy: A cross-sectional study in Addis Ababa, Ethiopia  
Firdu N., Enquesselassie F., Jerene D.  
*Pan African Medical Journal* (2017) 27 Article Number: 80.

Characteristics of adolescents living with HIV receiving care and treatment services in antiretroviral therapy clinics in Cambodia: descriptive findings from a cross-sectional study  
Yi S., Tuot S., Pal K., Khol V., Sok S., Chhoun P., Ferguson L., Mburu G.  
*BMC health services research* (2018) 18:1 (781).

Non-adherence to anti-retroviral therapy among HIV infected adults in Mon State of Myanmar  
Aye W.L., Puckpinyo A., Peltzer K.  
*BMC public health* (2017) 17:1 (391).

High-risk behaviours, and their associations with mental health, adherence to antiretroviral therapy and HIV parameters, in HIV-positive men who have sex with men

Pool E.R.M., Winston A., Bagkeris E., Vera J.H., Mallon P.W.G., Sachikonye M., Post F.A., Pozniak A., Boffito M., Anderson J., Williams I., Johnson M., Burgess L., Sabin C.A., Babalis D., Garvey L., Campbell L., Yurdakul S., Okumu S., Pollard L., Suárez B.S., Otiko D., Phillips L., Laverick R., Beynon M., Salz A.-L., Severn A., Fisher M., Clarke A., Richardson C., Kirk S., Gleig R., Macken A., Ghavani-Kia B., Maher J., Byrne M., Flaherty A., Babu S., Mguni S., Clark R., Nevin-Dolan R., Pelluri S., Ngwu N., Hemat N., Carroll A., Kinloch S., Youle M., Madge S., Whitehouse A., Babalis D., Garvey L., Underwood J., Tembo L., Stott M., McDonald L., Dransfield F., Bracchi M., Pagani N., Cerrone M., Bradshaw D., Ferretti F., Higgs C., Seah E., Fletcher S., Anthonipillai M., Moyes A., Deats K., Syed I., Matthews C., Fernando P., Chiwome C., Hardwick S., De Francesco D.  
*HIV Medicine (2019) 20:2 (131-136).*

Alcohol consumption among HIV-infected women: Impact on time to antiretroviral therapy and survival  
Neblett R.C., Hutton H.E., Lau B., McCaul M.E., Moore R.D., Chander G.  
*Journal of Women's Health (2011) 20:2 (279-286).*

Adherence to antiretroviral therapy among HIV/ AIDS patients in the context of early treatment initiation in Vietnam  
Mai H.T., Le G.M., Tran B.X., Do H.N., Latkin C.A., Nguyen L.T., Thai T.P.T., Le H.T., Ngo A.T., Nguyen C.T., Ho C.S.H., Ho R.C.M.  
*Patient Preference and Adherence (2018) 12 (2131-2137).*

Prevalence and correlates of substance use among youth living with HIV in clinical settings  
Gamarel K.E., Brown L., Kahler C.W., Fernandez M.I., Bruce D., Nichols S.  
*Drug and Alcohol Dependence (2016) 169 (11-18).*

Cigarette Smokers are Less Likely to Have Undetectable Viral Loads: Results from Four HIV Clinics  
Cropsey K.L., Willig J.H., Mugavero M.J., Crane H.M., McCullumsmith C., Lawrence S., Raper J.L., Christopher Mathews W., Boswell S., Kitahata M.M., Schumacher J.E., Saag M.S.  
*Journal of Addiction Medicine (2016) 10:1 (13-19).*
